# Supplementary material for: Correlation between the Antimicrobial Activity and Metabolic Profiles of Cell Free Supernatants and Membrane Vesicles Produced by Lactobacillus reuteri DSM 17938
Source: PubMed Central journal article supplement (PMC7692313; doi:10.3390/microorganisms8111653), 2020-10-24
Supplement: microorganisms-08-01653-s001.pdf [file microorganisms-08-01653-s001.pdf]

## Supplementary Material

**p2 Figure S1.** Representative ESI(+) FT-ICR mass spectra obtained from biofilm and planktonic vesicles extracts (bMVs and pMVs, respectively) and SurE 10K and SurM 10K supernatants.

**p3 Figure S2.** Representative ESI(-) FT-ICR mass spectra obtained for biofilm and planktonic vesicles extracts (bMVs and pMVs, respectively) and SurE 10K and SurM 10K supernatants.

**p4 Figure S3.** ESI(-) CID experiment conducted on peak  $m/z$  299 allowed the identification of hydroxy stearic acid.

**p5 Figure S4.** Cytotoxic effect in human epithelial H69 cholangiocytes after 24 and 48 h exposure compared the control. MRSB, bacterial medium. RPMI, cell culture medium. SurP, total planktonic supernatant, pMVs included. SurM 10K, just vesicles (>10K). SurE 10K, fractionated planktonic supernatant (<10K). SurE 3K, fractionated planktonic supernatant (<3K). Data are expressed as mean  $\pm$  SE (standard error) of at least two experiments in which each treatment was tested at least in triplicate ( $n = 6$ ). Data are expressed as mean  $\pm$  SE (standard error) of at least two experiments in which each treatment was tested at least in triplicate ( $n = 6$ ). \*  $p < 0.05$ , \*\*  $p < 0.01$ , \*\*\*  $p < 0.001$  (ANOVA + Multiple Dunnett's Comparison Post-test), significantly lower than the control after the same time exposure. §  $p < 0.001$  (t-Student test), significantly lower than 24 h.

**p6 Figure S5.** Cytotoxic effect in human bronchial epithelial BEAS-2B cells after 24 and 48 h exposure compared the control. MRSB, bacterial medium. RPMI, cell culture medium. SurP, total planktonic supernatant, pMVs included. SurM 10K, just vesicles (>10K). SurE 10K, fractionated planktonic supernatant (<10K). SurE 3K, fractionated planktonic supernatant (<3K). Data are expressed as mean  $\pm$  SE (standard error) of at least two experiments in which each treatment was tested at least in triplicate ( $n = 6$ ). \*\*\*  $p < 0.001$  (ANOVA + Multiple Dunnett's Comparison Post-test), significantly lower than the control after the same time exposure. §  $p < 0.001$  (t-Student test), significantly lower than 24 h.

**p7 Figure S6.** Time-schedules of the long-term exposures of 24 and 48 h.

**p8 Figure S7.** Histograms of the relative frequency of CH, CHN, CHNO, CHNOP, CHNOS, CHO, CHOP, and CHOS compounds.

**p9 Figure S8.** The number of common and uncommon features in pMVs and bMVs (upper panel) and SurE 10K and SurM 10K (lower panel) are summarized in Venn diagrams.

**p10 Table S1.** ESI FT-ICR MS comprehensive list of metabolites detected in bMVs extract.

**p19 Table S2.** ESI FT-ICR MS comprehensive list of metabolites detected in pMVs extract.

**p26 Table S3.** ESI FT-ICR MS comprehensive list of metabolites detected in SurE 10K.

**p40 Table S4.** ESI FT-ICR MS comprehensive list of metabolites detected in SurM 10K.

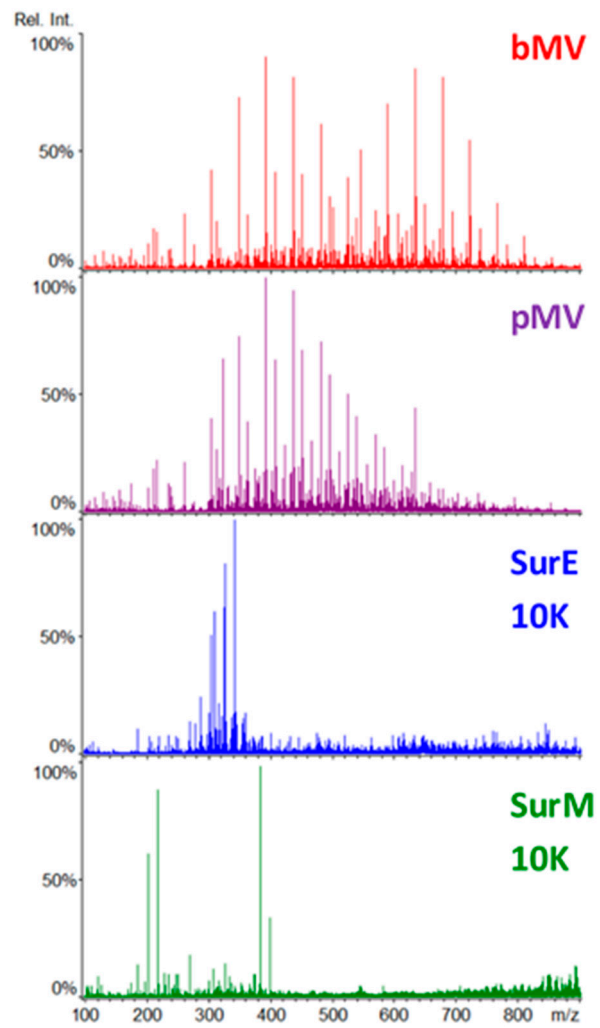

**Figure S1.** Representative ESI(+) FT-ICR mass spectra obtained for biofilm and planktonic vesicles extracts (bMVs and pMVs, respectively) and SurE 10K and SurM 10K supernatants.

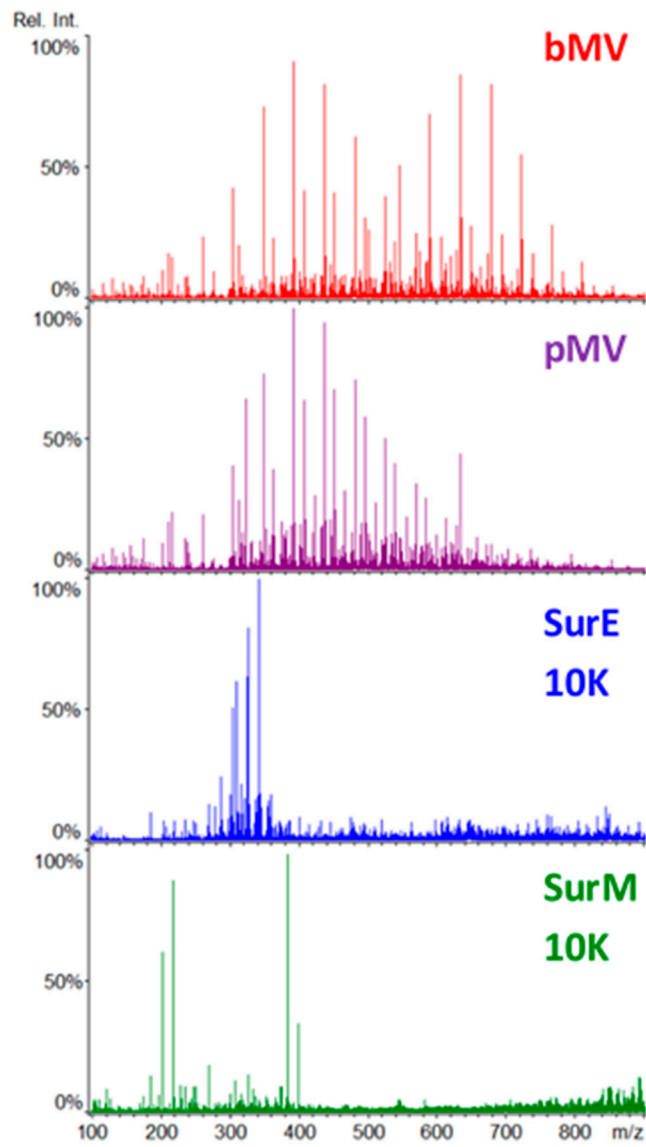

**Figure S2.** Representative ESI(-) FT-ICR mass spectra obtained for biofilm and planktonic vesicles extracts (bMVs and pMVs, respectively) and SurE 10K and SurM 10K supernatants.

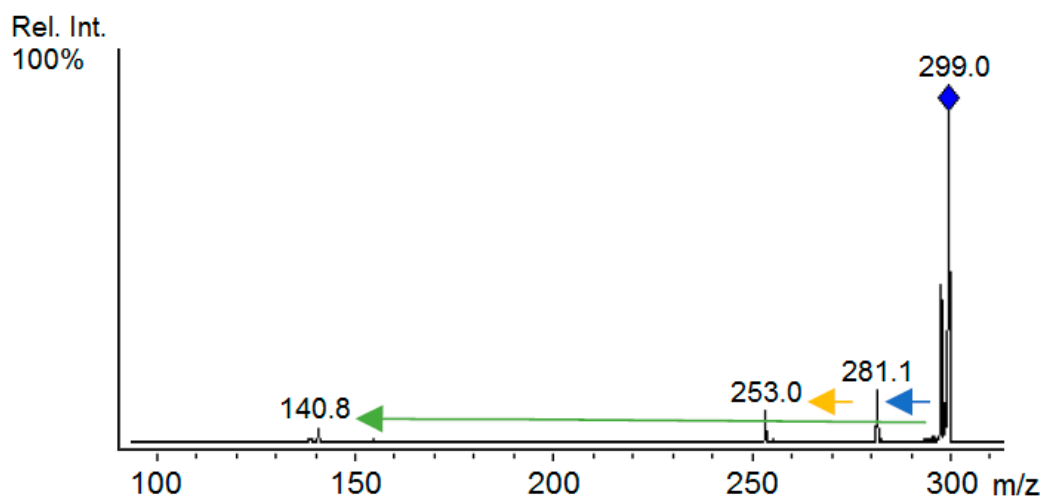

**Figure S3.** ESI(-) CID experiment conducted on peak  $m/z$  299 allowed the identification of hydroxy stearic acid.

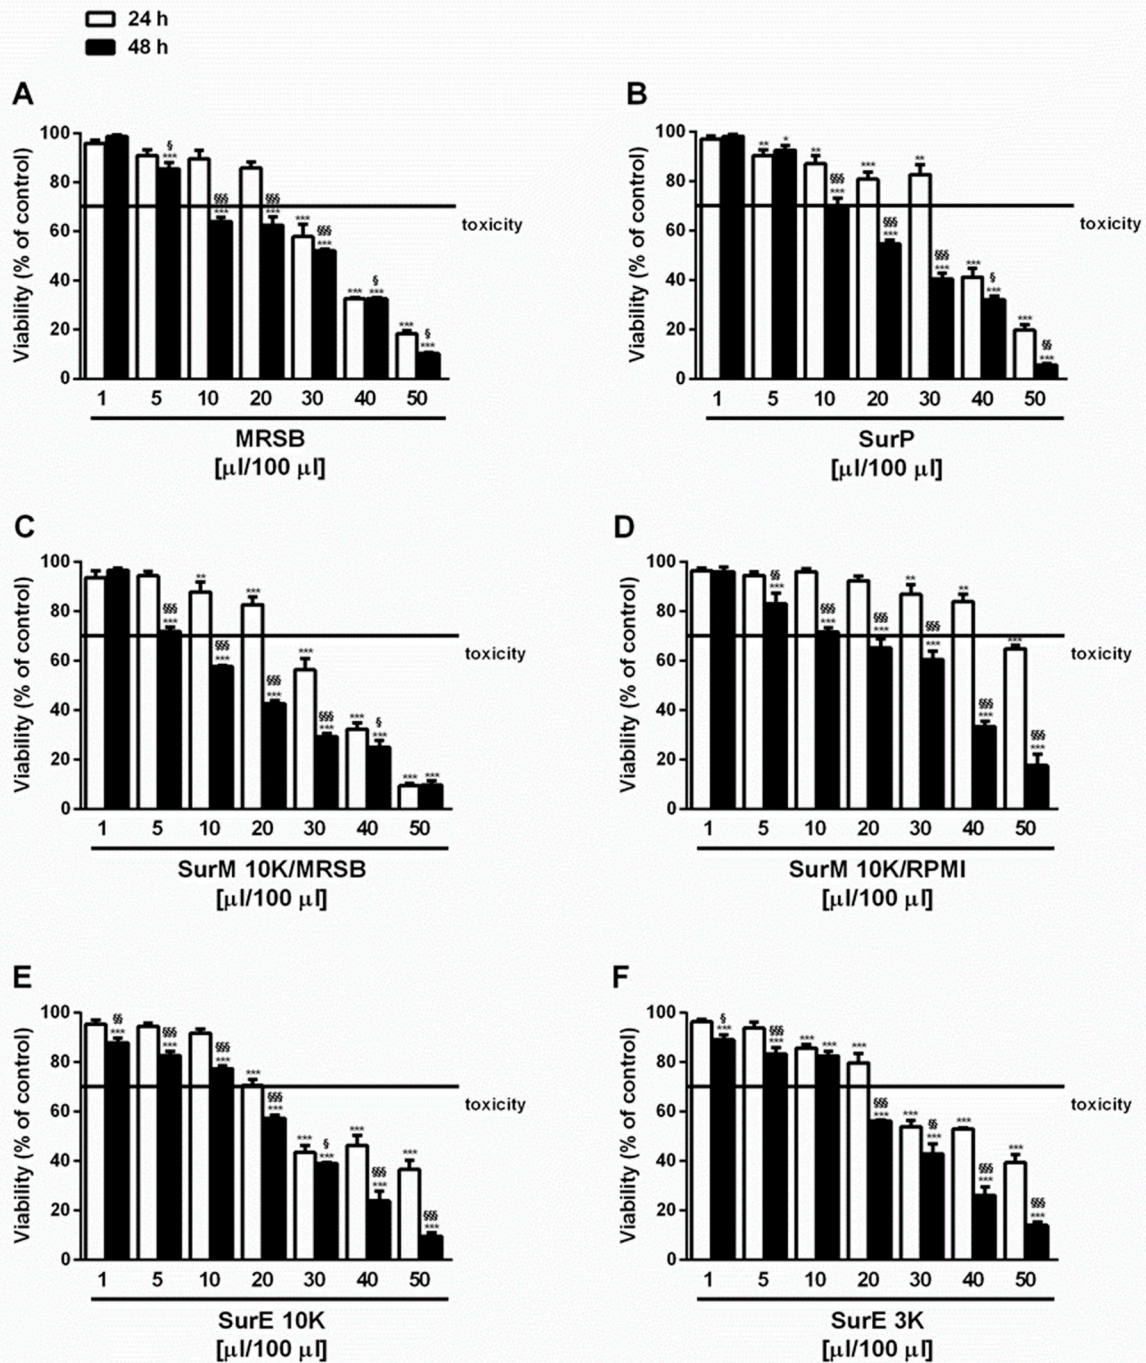

**Figure S4.** Cytotoxic effect in human epithelial H69 cholangiocytes after 24 and 48 h exposure compared the control. MRSB, bacterial medium. RPMI, cell culture medium. SurP, total planktonic supernatant, pMVs included. SurM 10K, just vesicles ( $>10\text{K}$ ). SurE 10K, fractionated planktonic supernatant ( $<10\text{K}$ ). SurE 3K, fractionated planktonic supernatant ( $<3\text{K}$ ). Data are expressed as mean  $\pm$  SE (standard error) of at least two experiments in which each treatment was tested at least in triplicate ( $n = 6$ ). Data are expressed as mean  $\pm$  SE (standard error) of at least two experiments in which each treatment was tested at least in triplicate ( $n = 6$ ). \*  $p < 0.05$ , \*\*  $p < 0.01$ , \*\*\*  $p < 0.001$  (ANOVA + Multiple Dunnett's Comparison Post-test), significantly lower than the control after the same time exposure. §  $p < 0.001$  (t-Student test), significantly lower than 24 h.

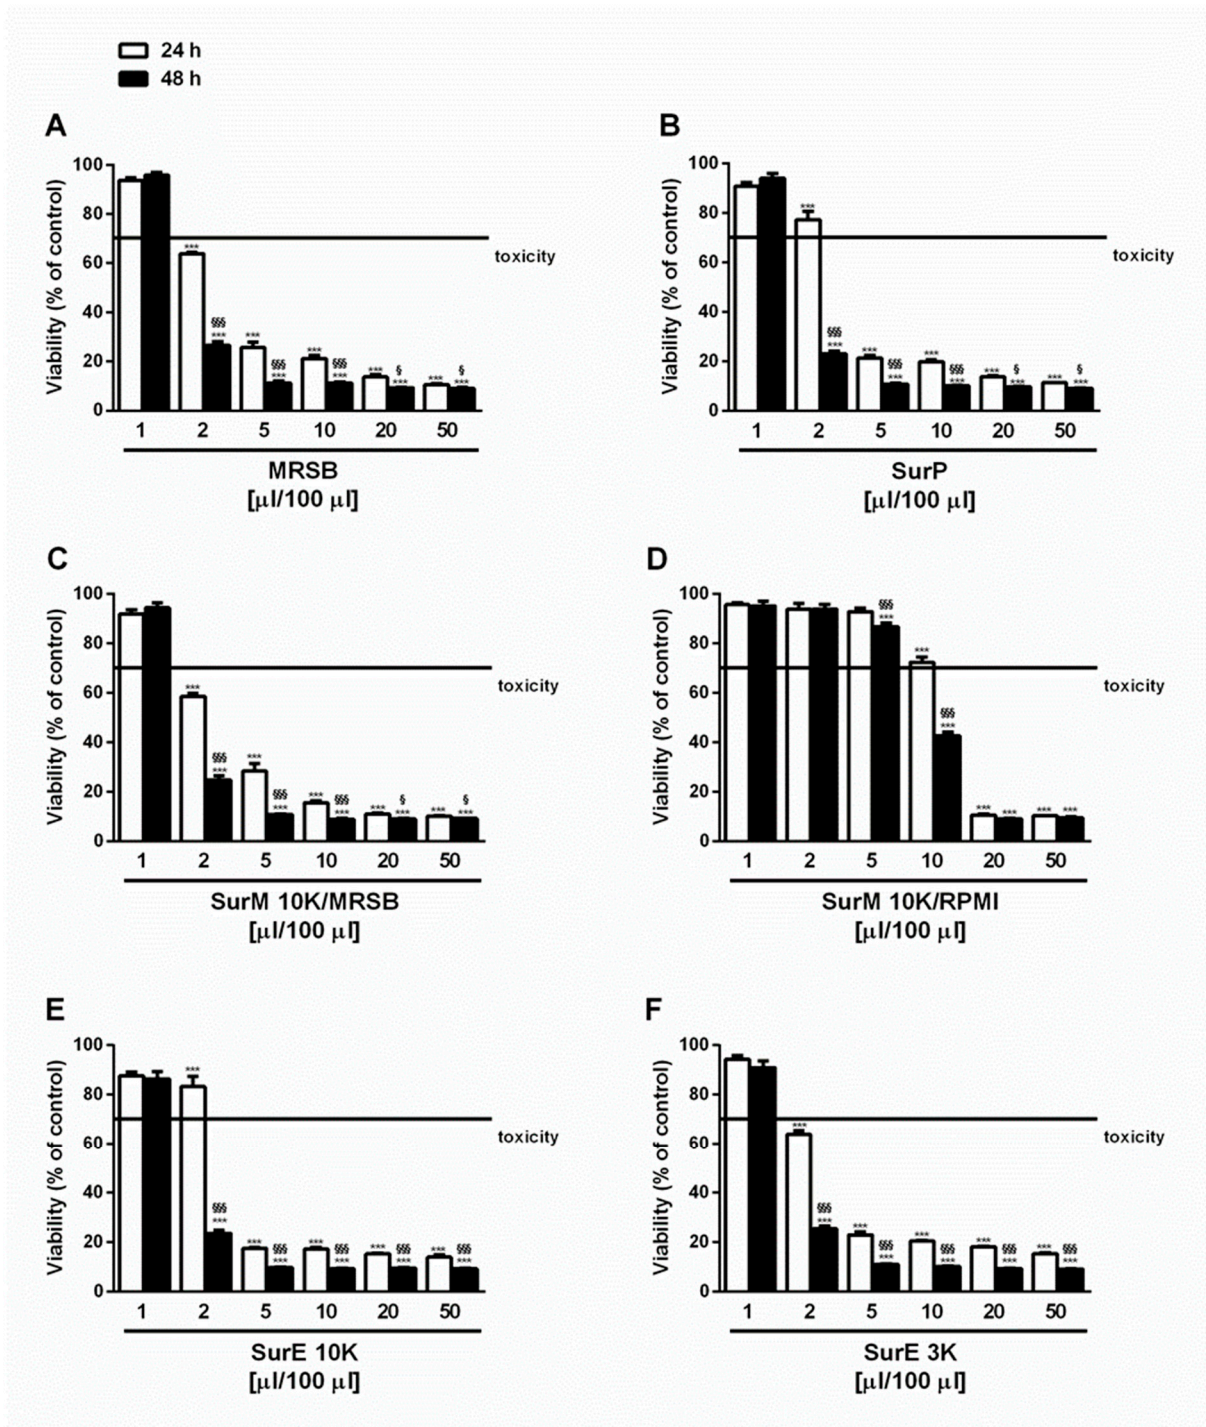

**Figure S5.** Cytotoxic effect in human bronchial epithelial BEAS-2B cells after 24 and 48 h exposure compared the control. MRSB, bacterial medium. RPMI, cell culture medium. SurP, total planktonic supernatant, pMVs included. SurM 10K, just vesicles (>10K). SurE 10K, fractionated planktonic supernatant (<10K). SurE 3K, fractionated planktonic supernatant (<3K). Data are expressed as mean  $\pm$  SE (standard error) of at least two experiments in which each treatment was tested at least in triplicate (n = 6). \*\*\*p < 0.001 (ANOVA + Multiple Dunnett's Comparison Post-test), significantly lower than the control after the same time exposure. §p < 0.001 (t-Student test), significantly lower than 24 h.

**Single treatment – 24 h exposure**

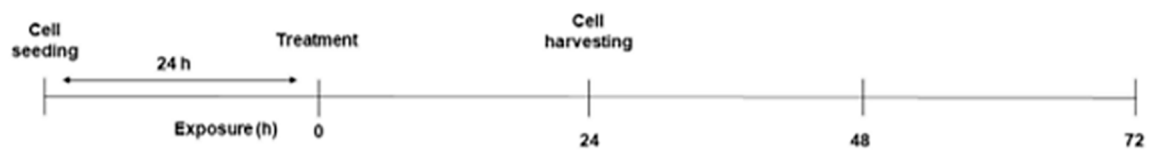

**Single treatment – 48 h exposure**

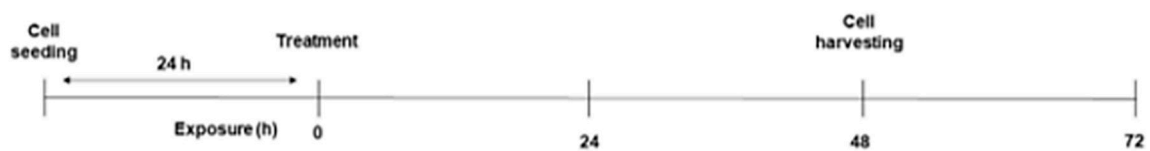

**Figure S6.** Time-schedules of the long-term exposures of 24 and 48 h.

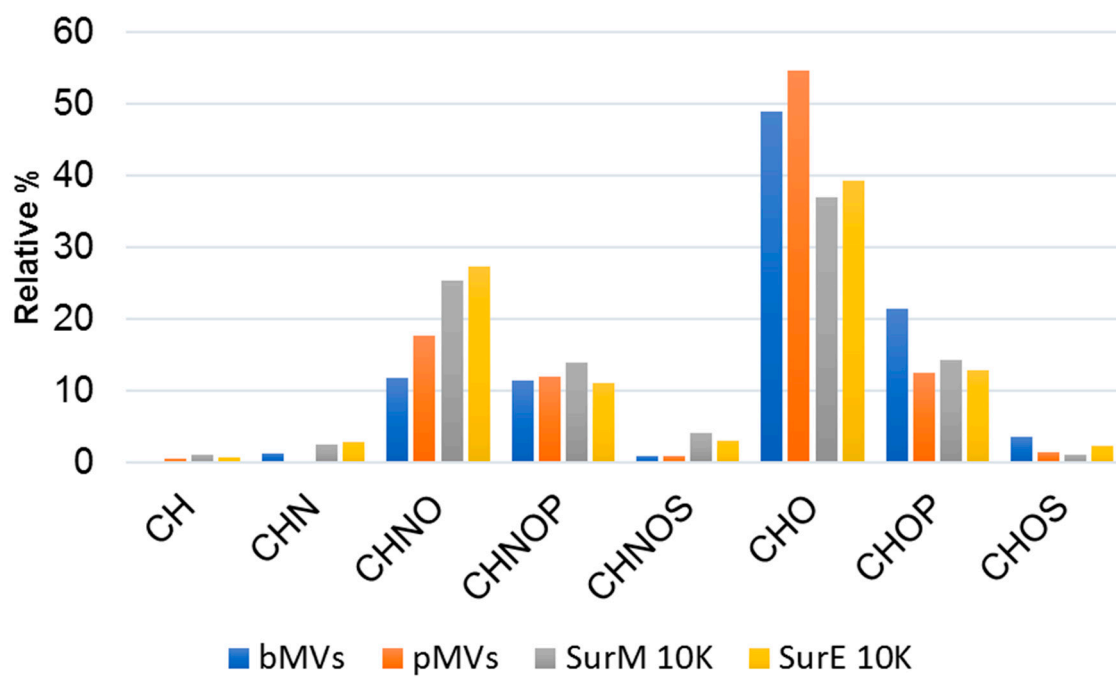

**Figure S7.** Histograms of the relative frequency of CH, CHN, CHNO, CHNOP, CHNOS, CHO, CHOP, and CHOS compounds.



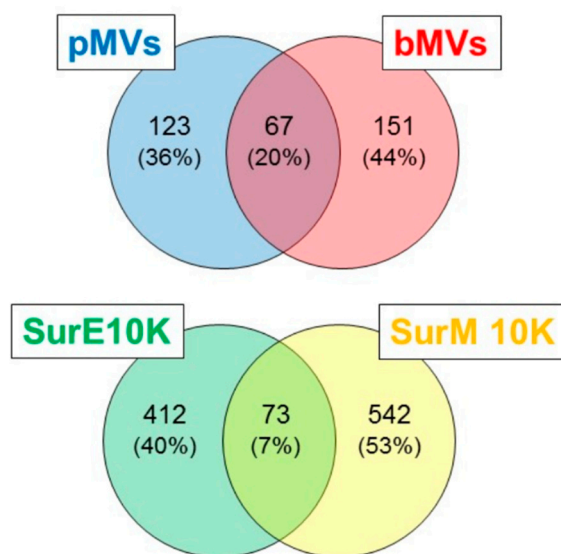

**Figure S8.** The number of common and uncommon features in pMVs and bMVs (upper panel) and SurE 10K and SurM 10K (lower panel) are summarized in Venn diagrams.

**Table S2.** ESI FT-ICR MS comprehensive list of metabolites detected in bMVs extract.

| #  | Putative Annotation (M) <sup>a</sup> | Ion     | Formula   | Theor. $m/z$ <sup>b</sup> | Exp. $m/z$ <sup>c</sup> | ppm <sup>d</sup> | Peak_Height |
|----|--------------------------------------|---------|-----------|---------------------------|-------------------------|------------------|-------------|
| 1  | Lactic acid                          | [M-H]-  | C3H6O3    | 89.02442                  | 89.02438                | -0.4             | 2.3E+06     |
| 2  | Acetyl-imidazole                     | [M+Cl]- | C5H6N2O   | 145.01741                 | 145.01746               | 0.3              | 2.3E+06     |
| 3  | Adipic acid                          | [M-H]-  | C6H10O4   | 145.05063                 | 145.05071               | 0.5              | 3.4E+05     |
| 4  | Glutamic acid                        | [M-H]-  | C5H9NO4   | 146.04588                 | 146.04589               | 0.1              | 9.3E+06     |
| 5  | Diethylphosphate                     | [M-H]-  | C4H11O4P  | 153.03222                 | 153.03226               | 0.3              | 7.3E+05     |
| 6  | 3-hydroxy valeric acid               | [M+Cl]- | C5H10O3   | 153.03240                 | 153.03226               | -0.9             | 7.3E+05     |
| 7  | Nonanoic acid                        | [M-H]-  | C9H18O2   | 157.12340                 | 157.12320               | -1.3             | 4.5E+05     |
| 8  | D-Glutamate                          | [M+Na]+ | C5H9NO4   | 170.04238                 | 170.04189               | -2.9             | 7.2E+05     |
| 9  | 9-Oxononanoic acid                   | [M-H]-  | C9H16O3   | 171.10267                 | 171.10276               | 0.5              | 3.1E+05     |
| 10 | Triethanolamine                      | [M+Na]+ | C6H15NO3  | 172.09441                 | 172.09398               | -2.5             | 6.9E+05     |
| 11 | Arginine                             | [M+H]+  | C6H14N4O2 | 175.11895                 | 175.11893               | -0.1             | 1.8E+06     |
| 12 | Aldohexose                           | [M-H]-  | C6H12O6   | 179.05611                 | 179.05605               | -0.3             | 7.3E+05     |
| 13 | Dicyclohexylamine                    | [M+H]+  | C12H23N   | 182.19033                 | 182.18998               | -1.9             | 1.0E+06     |
| 14 | Oxodecenoic acid                     | [M-H]-  | C10H16O3  | 183.10267                 | 183.10267               | 0.0              | 5.3E+05     |
| 15 | Azelaic acid                         | [M-H]-  | C9H16O4   | 187.09758                 | 187.09752               | -0.3             | 1.0E+06     |
| 16 | Quinic acid                          | [M-H]-  | C7H12O6   | 191.05611                 | 191.05615               | 0.2              | 6.2E+05     |
| 17 | L-Tyrosine methyl ester              | [M-H]-  | C10H13NO3 | 194.08227                 | 194.08239               | 0.6              | 3.4E+05     |
| 18 | D-Arginine                           | [M+Na]+ | C6H14N4O2 | 197.10090                 | 197.10036               | -2.7             | 5.4E+05     |
| 19 | Dodecanoic acid                      | [M-H]-  | C12H24O2  | 199.17035                 | 199.17069               | 1.7              | 1.6E+06     |
| 20 | 11-amino-undecanoic acid             | [M+H]+  | C11H23NO2 | 202.18016                 | 202.17962               | -2.6             | 8.1E+05     |
| 21 | Aldohexose                           | [M+Na]+ | C6H12O6   | 203.05261                 | 203.05234               | -1.3             | 1.7E+07     |
| 22 | D-Sorbitol                           | [M+Na]+ | C6H14O6   | 205.06826                 | 205.06846               | 1.0              | 5.2E+05     |
| 23 | 5-oxo-7E-decenoic acid               | [M+Na]+ | C10H16O3  | 207.09917                 | 207.09865               | -2.5             | 8.7E+05     |
| 24 | cis-2-Carboxycyclohexyl-acetic acid  | [M+Na]+ | C9H14O4   | 209.07843                 | 209.07814               | -1.4             | 5.5E+05     |
| 25 | 2-hydroxy pelargonic acid            | [M+Cl]- | C9H18O3   | 209.09500                 | 209.09553               | 2.6              | 8.5E+05     |
| 26 | D-Glucose                            | [M+Cl]- | C6H12O6   | 215.03279                 | 215.03297               | 0.8              | 5.0E+06     |
| 27 | Aldohexose                           | [M+K]+  | C6H12O6   | 219.02655                 | 219.02676               | 1.0              | 6.6E+05     |
| 28 | 4- <i>n</i> -Nonylphenol             | [M-H]-  | C15H24O   | 219.17544                 | 219.17582               | 1.7              | 6.5E+05     |
| 29 | 2E-Decenedioic acid                  | [M+Na]+ | C10H16O4  | 223.09408                 | 223.09403               | -0.2             | 7.7E+05     |

| #  | Putative Annotation (M) <sup>a</sup>        | Ion     | Formula    | Theor. <i>m/z</i> <sup>b</sup> | Exp. <i>m/z</i> <sup>c</sup> | ppm <sup>d</sup> | Peak_Height |
|----|---------------------------------------------|---------|------------|--------------------------------|------------------------------|------------------|-------------|
| 30 | 5-Acetylamino-6-formylamino-3-methyluracil  | [M-H]-  | C8H10N4O4  | 225.06293                      | 225.06253                    | -1.8             | 5.0E+06     |
| 31 | 10-hydroxy-undecanoic acid                  | [M+Na]+ | C11H22O3   | 225.14612                      | 225.14556                    | -2.5             | 7.3E+05     |
| 32 | 4-(Dimethylamino)azobenzene                 | [M+H]+  | C14H15N3   | 226.13387                      | 226.13362                    | -1.1             | 1.4E+06     |
| 33 | Myristic acid                               | [M-H]-  | C14H28O2   | 227.20165                      | 227.20175                    | 0.4              | 8.5E+05     |
| 34 | Sinapyl alcohol                             | [M+Na]+ | C11H14O4   | 233.07843                      | 233.07853                    | 0.4              | 6.6E+05     |
| 35 | Guanethidine                                | [M+Cl]- | C10H22N4   | 233.15385                      | 233.15419                    | 1.5              | 6.4E+05     |
| 36 | alpha-Cyperone                              | [M-H]-  | C15H22O2   | 233.15470                      | 233.15419                    | -2.2             | 6.4E+05     |
| 37 | 10-hydroxy-undecanoic acid                  | [M+Cl]- | C11H22O3   | 237.12630                      | 237.12649                    | 0.8              | 4.5E+05     |
| 38 | 10-hydroxy-11-dodecenoic acid               | [M+Na]+ | C12H22O3   | 237.14612                      | 237.14673                    | 2.6              | 5.5E+05     |
| 39 | ( <i>R</i> )-3-Hydroxydodecanoic acid       | [M+Na]+ | C12H24O3   | 239.16177                      | 239.16196                    | 0.8              | 4.6E+05     |
| 40 | Pentadecanoic acid                          | [M-H]-  | C15H30O2   | 241.21730                      | 241.21742                    | 0.5              | 7.3E+05     |
| 41 | Apiole                                      | [M+Na]+ | C12H14O4   | 245.07843                      | 245.07781                    | -2.5             | 8.3E+05     |
| 42 | Myristoleic acid                            | [M+Na]+ | C14H26O2   | 249.18250                      | 249.18204                    | -1.8             | 5.4E+05     |
| 43 | Myristic acid                               | [M+Na]+ | C14H28O2   | 251.19815                      | 251.19832                    | 0.7              | 1.3E+06     |
| 44 | Palmitoleic acid                            | [M-H]-  | C16H30O2   | 253.21730                      | 255.21768                    | 1.4              | 9.3E+05     |
| 45 | Enecalinal                                  | [M+Na]+ | C14H16O3   | 255.09917                      | 255.09903                    | -0.5             | 1.8E+06     |
| 46 | Palmitic acid                               | [M-H]-  | C16H32O2   | 255.23295                      | 267.23295                    | 0.2              | 5.9E+06     |
| 47 | Macrophyllic acid A                         | [M+Na]+ | C15H22O2   | 257.15120                      | 257.15088                    | -1.2             | 6.1E+05     |
| 48 | 3-Dimethylallyl-4-hydroxymandelic acid      | [M+Na]+ | C13H16O4   | 259.09408                      | 259.09364                    | -1.7             | 5.6E+05     |
| 49 | (+)-12-methyl myristic acid                 | [M+Na]+ | C15H30O2   | 265.21380                      | 265.21384                    | 0.1              | 1.2E+06     |
| 50 | Heptadecenoic acid                          | [M-H]-  | C17H32O2   | 267.23295                      | 269.08903                    | 0.0              | 1.8E+06     |
| 51 | 6-Hydroxyl-1,6-dihydropurine ribonucleoside | [M-H]-  | C10H14N4O5 | 269.08914                      | 269.24885                    | -0.4             | 1.8E+06     |
| 52 | Methyl palmitate                            | [M-H]-  | C17H34O2   | 269.24860                      | 279.23338                    | 0.9              | 5.7E+05     |
| 53 | 3,6,4'-Trihydroxyflavone                    | [M+H]+  | C15H10O5   | 271.06010                      | 271.05932                    | -2.9             | 5.6E+05     |
| 54 | Podocarpic acid                             | [M+H]+  | C17H22O3   | 275.16417                      | 275.16342                    | -2.7             | 1.4E+06     |
| 55 | Glu-Glu                                     | [M+H]+  | C10H16N2O7 | 277.10303                      | 277.10259                    | -1.6             | 2.2E+06     |
| 56 | Palmitoleic acid                            | [M+Na]+ | C16H30O2   | 277.21380                      | 277.21420                    | 1.4              | 1.5E+06     |
| 57 | Palmitic acid                               | [M+Na]+ | C16H32O2   | 279.22945                      | 279.22972                    | 1.0              | 1.5E+06     |
| 58 | Linoleic Acid                               | [M-H]-  | C18H32O    | 279.23295                      | 281.24865                    | 1.5              | 3.8E+06     |
| 59 | Oleic acid                                  | [M-H]-  | C18H34O2   | 281.24860                      | 283.26466                    | 0.2              | 7.0E+06     |

| #  | Putative Annotation (M) <sup>a</sup>                               | Ion     | Formula      | Theor. <i>m/z</i> <sup>b</sup> | Exp. <i>m/z</i> <sup>c</sup> | ppm <sup>d</sup> | Peak_Height |
|----|--------------------------------------------------------------------|---------|--------------|--------------------------------|------------------------------|------------------|-------------|
| 60 | Stearic acid                                                       | [M-H]-  | C18H36O2     | 283.26425                      | 287.22309                    | 1.4              | 6.6E+06     |
| 61 | Dihydroxy-palmitic acid                                            | [M-H]-  | C16H32O4     | 287.22278                      | 291.21045                    | 1.1              | 7.3E+05     |
| 62 | C17 Sphinganine                                                    | [M+H]+  | C17H37NO2    | 288.28971                      | 288.28902                    | -2.4             | 7.0E+05     |
| 63 | (1 <i>R</i> ,2 <i>R</i> )-3-oxo-2-pentyl-cyclopentanehexanoic acid | [M+Na]+ | C16H28O3     | 291.19307                      | 291.19286                    | -0.7             | 6.4E+05     |
| 64 | Palmitic acid                                                      | [M+Cl]- | C16H32O2     | 291.20963                      | 293.21226                    | 2.8              | 7.8E+05     |
| 65 | 4'-Hydroxy-7-methoxy-8-methylflavan                                | [M+Na]+ | C17H18O3     | 293.11482                      | 293.11478                    | -0.1             | 1.2E+06     |
| 66 | 17-Hydroxylinolenic acid                                           | [M-H]-  | C18H30O3     | 293.21222                      | 295.22818                    | 0.1              | 5.1E+05     |
| 67 | 12 <i>R</i> -hydroxy-9 <i>Z</i> ,15 <i>Z</i> -octadecadienoic acid | [M-H]-  | C18H32O3     | 295.22787                      | 298.15718                    | 1.1              | 1.5E+06     |
| 68 | Annofoline                                                         | [M+Cl]- | C16H25NO2    | 298.15793                      | 299.25950                    | -2.5             | 7.7E+05     |
| 69 | ( <i>R</i> )-2-Hydroxystearate                                     | [M-H]-  | C18H36O3     | 299.25917                      | 301.23844                    | 1.1              | 5.9E+06     |
| 70 | Alpha-Linolenic acid                                               | [M+Na]+ | C18H30O2     | 301.21380                      | 301.21439                    | 2.0              | 7.3E+05     |
| 71 | MG(0:0/14:0/0:0)                                                   | [M-H]-  | C17H34O4     | 301.23843                      | 312.17227                    | 0.0              | 3.9E+06     |
| 72 | Phaseic acid                                                       | [M+Na]+ | C15H20O5     | 303.12029                      | 303.11964                    | -2.2             | 1.7E+06     |
| 73 | Linoleic acid                                                      | [M+Na]+ | C18H32O2     | 303.22945                      | 303.22966                    | 0.7              | 5.1E+06     |
| 74 | 4-Oxo-13- <i>cis</i> -retinoate                                    | [M-H]-  | C20H25O3     | 312.17309                      | 315.20907                    | -2.6             | 3.6E+06     |
| 75 | Linoleic acid                                                      | [M+Cl]- | C18H32O2     | 315.20963                      | 327.25485                    | -1.8             | 5.7E+05     |
| 76 | 12 <i>R</i> -hydroxy-9 <i>E</i> -octadecenoic acid                 | [M+Na]+ | C18H34O3     | 321.24002                      | 321.24011                    | 0.3              | 1.1E+06     |
| 77 | 5,7,4'-Trimethoxyflavan                                            | [M+Na]+ | C18H20O4     | 323.12538                      | 323.12504                    | -1.1             | 7.1E+05     |
| 78 | ( <i>R</i> )-10-hydroxystearic acid                                | [M+Na]+ | C18H36O3     | 323.25567                      | 323.25537                    | -0.9             | 6.8E+06     |
| 79 | Tributylin                                                         | [M+Na]+ | C15H26O6     | 325.16216                      | 325.16228                    | 0.4              | 2.3E+06     |
| 80 | 4,7,10,13-Docosatetraynoic acid                                    | [M+H]+  | C22H28O2     | 325.21621                      | 325.21539                    | -2.5             | 7.8E+05     |
| 81 | MG(0:0/16:1(9 <i>Z</i> )/0:0)                                      | [M-H]-  | C19H36O4     | 327.25408                      | 329.27050                    | 2.3              | 2.4E+06     |
| 82 | 10-nitro-9 <i>E</i> -octadecenoic acid                             | [M+H]+  | C18H33NO4    | 328.24824                      | 328.24883                    | 1.8              | 1.0E+06     |
| 83 | ( <i>Z</i> )-11beta,21-Dihydroxypregna-1,4,17(20)-trien-3-one      | [M+H]+  | C21H28O3     | 329.21112                      | 329.21053                    | -1.8             | 1.3E+06     |
| 84 | MG(0:0/16:0/0:0)                                                   | [M-H]-  | C19H38O4     | 329.26973                      | 340.20549                    | 2.3              | 2.8E+06     |
| 85 | Lipoyllysine                                                       | [M+H]+  | C14H26N2O3S2 | 335.14576                      | 335.14676                    | 3.0              | 1.0E+06     |
| 86 | (9 <i>Z</i> )-(7 <i>S</i> ,8 <i>S</i> )-Dihydroxyoctadecenoic acid | [M+Na]+ | C18H34O4     | 337.23493                      | 337.23497                    | 0.1              | 4.6E+06     |
| 87 | 17beta-Nitro-5alpha-androstane                                     | [M+Cl]- | C19H31NO2    | 340.20488                      | 353.08776                    | 1.8              | 2.7E+06     |
| 88 | 2-hydroxy-icosanoic acid                                           | [M+Na]+ | C20H40O3     | 351.28697                      | 351.28790                    | 2.7              | 8.1E+05     |
| 89 | Chlorogenic acid                                                   | [M-H]-  | C16H18O9     | 353.08781                      | 367.25003                    | -0.1             | 9.0E+06     |

| #   | Putative Annotation (M) <sup>a</sup>                                      | Ion                 | Formula      | Theor. <i>m/z</i> <sup>b</sup> | Exp. <i>m/z</i> <sup>c</sup> | ppm <sup>d</sup> | Peak_Height |
|-----|---------------------------------------------------------------------------|---------------------|--------------|--------------------------------|------------------------------|------------------|-------------|
| 90  | MG(0:0/16:0/0:0)                                                          | [M+Na] <sup>+</sup> | C19H38O4     | 353.26623                      | 353.26651                    | 0.8              | 1.4E+07     |
| 91  | 18-hydroxy-9 <i>S</i> ,10 <i>R</i> -dihydroxy-stearic acid                | [M+Na] <sup>+</sup> | C18H36O5     | 355.24549                      | 355.24492                    | -1.6             | 1.4E+06     |
| 92  | MG(0:0/18:2(9 <i>Z</i> ,12 <i>Z</i> )/0:0)                                | [M+H] <sup>+</sup>  | C21H38O4     | 355.28429                      | 355.28323                    | -3.0             | 9.8E+05     |
| 93  | 2- $\alpha$ -D-Glucosyl-D-glucose                                         | [M+Na] <sup>+</sup> | C12H22O11    | 365.10543                      | 365.10434                    | -3.0             | 4.4E+06     |
| 94  | 16,17-epoxy-DHA                                                           | [M+Na] <sup>+</sup> | C22H30O3     | 365.20872                      | 365.20815                    | -1.5             | 1.3E+06     |
| 95  | Cortol                                                                    | [M-H] <sup>-</sup>  | C21H36O5     | 367.24900                      | 387.11735                    | 2.8              | 6.6E+05     |
| 96  | (3 <i>S</i> ,4 <i>S</i> )-3-Hydroxytetradecane-1,3,4-tricarboxylate       | [M+Na] <sup>+</sup> | C17H30O7     | 369.18837                      | 369.18805                    | -0.9             | 3.4E+06     |
| 97  | (20 <i>S</i> )-3 $\beta$ -Hydroxychola-5,16-dien-24-oic Acid              | [M+H] <sup>+</sup>  | C24H36O3     | 373.27372                      | 373.27317                    | -1.5             | 1.5E+06     |
| 98  | 6,7-dihydro-5-oxo-12-epi-LTB4                                             | [M+K] <sup>+</sup>  | C20H31O4     | 374.18539                      | 374.18569                    | 0.8              | 1.5E+06     |
| 99  | Trimethylolpropane trimethacrylate                                        | [M+K] <sup>+</sup>  | C18H26O6     | 377.13610                      | 377.13715                    | 2.8              | 1.3E+06     |
| 100 | 1 $\alpha$ ,5 $\alpha$ -Dimercaptoandrostane-3 $\alpha$ ,17 $\beta$ -diol | [M+Na] <sup>+</sup> | C19H32O2S2   | 379.17359                      | 379.17330                    | -0.8             | 7.5E+06     |
| 101 | 2,3-Dinor-6-keto-prostaglandin F1 a                                       | [M+K] <sup>+</sup>  | C18H30O6     | 381.16740                      | 381.16738                    | 0.0              | 9.1E+05     |
| 102 | MG(0:0/18:0/0:0)                                                          | [M+Na] <sup>+</sup> | C21H42O4     | 381.29753                      | 381.29757                    | 0.1              | 1.4E+07     |
| 103 | Fructoselysine 6-phosphate                                                | [M-H] <sup>-</sup>  | C12H25N2O10P | 387.11741                      | 393.27707                    | -0.1             | 6.3E+05     |
| 104 | Fulvinervin B                                                             | [M+H] <sup>+</sup>  | C25H22O4     | 387.15909                      | 387.15924                    | 0.4              | 9.3E+05     |
| 105 | Rehmaionoside A                                                           | [M+H] <sup>+</sup>  | C19H34O8     | 391.23264                      | 391.23177                    | -2.2             | 3.5E+06     |
| 106 | MG(18:0/0:0/0:0)                                                          | [M+Cl] <sup>-</sup> | C21H42O4     | 393.27771                      | 546.13727                    | -1.6             | 1.7E+06     |
| 107 | 9'-carboxy- $\gamma$ -tocotrienol                                         | [M+Na] <sup>+</sup> | C23H31O4     | 394.21146                      | 394.21252                    | 2.7              | 2.4E+07     |
| 108 | 2,4,2'-Trihydroxy-6'',6''-dimethyl-3'-prenylpyrano[2'',3'':4',5']chalcone | [M+H] <sup>+</sup>  | C25H26O5     | 407.18530                      | 407.18515                    | -0.4             | 1.4E+07     |
| 109 | 9'-Carboxy- $\alpha$ -tocotrienol                                         | [M+Na] <sup>+</sup> | C24H33O4     | 408.22711                      | 408.22807                    | 2.4              | 1.2E+07     |
| 110 | 9'-carboxy- $\gamma$ -tocotrienol                                         | [M+K] <sup>+</sup>  | C23H31O4     | 410.18539                      | 410.18578                    | 0.9              | 2.8E+06     |
| 111 | Prebarbigerone                                                            | [M+H] <sup>+</sup>  | C24H26O6     | 411.18022                      | 411.18029                    | 0.2              | 1.4E+06     |
| 112 | Rehmaionoside B                                                           | [M+Na] <sup>+</sup> | C19H34O8     | 413.21459                      | 413.21427                    | -0.8             | 5.5E+06     |
| 113 | Diisooctyl phthalate                                                      | [M+Na] <sup>+</sup> | C24H38O4     | 413.26623                      | 413.26721                    | 2.4              | 2.9E+06     |
| 114 | 9'-Carboxy- $\gamma$ -chromanol                                           | [M+K] <sup>+</sup>  | C23H35O4     | 414.21669                      | 414.21674                    | 0.1              | 1.0E+06     |
| 115 | Distigmine                                                                | [M+H] <sup>+</sup>  | C22H32N4O4   | 417.24963                      | 417.24879                    | -2.0             | 1.9E+06     |
| 116 | Sphingosine 1-phosphate                                                   | [M+K] <sup>+</sup>  | C18H38NO5P   | 418.21192                      | 418.21243                    | 1.2              | 2.2E+06     |
| 117 | Gangetinin                                                                | [M+H] <sup>+</sup>  | C26H26O5     | 419.18530                      | 419.18457                    | -1.7             | 1.2E+06     |
| 118 | (10 <i>E</i> )-19-methylvitamin D3                                        | [M+Na] <sup>+</sup> | C28H46O      | 421.34409                      | 421.34337                    | -1.7             | 1.1E+06     |
| 119 | 9'-Carboxy- $\alpha$ -tocotrienol                                         | [M+K] <sup>+</sup>  | C24H33O4     | 424.20104                      | 424.20191                    | 2.0              | 3.4E+06     |

| #   | Putative Annotation (M) <sup>a</sup>                                   | Ion                 | Formula     | Theor. <i>m/z</i> <sup>b</sup> | Exp. <i>m/z</i> <sup>c</sup> | ppm <sup>d</sup> | Peak_Height |
|-----|------------------------------------------------------------------------|---------------------|-------------|--------------------------------|------------------------------|------------------|-------------|
| 120 | (22E)-3alpha,6beta,7beta-Trihydroxy-5beta-chole-22-en-24-oic Acid      | [M+K] <sup>+</sup>  | C24H38O5    | 445.23508                      | 445.23641                    | 3.0              | 4.1E+06     |
| 121 | 3',4',6'-Trihydroxy-2'-oxo-3',5'-diprenyldihydrochalcone               | [M+K] <sup>+</sup>  | C25H30O5    | 449.17248                      | 449.17321                    | 1.6              | 1.6E+06     |
| 122 | LysoPC(10:0)                                                           | [M+K] <sup>+</sup>  | C18H39NO7P  | 451.20957                      | 451.21000                    | 0.9              | 1.4E+07     |
| 123 | 17-phenyl-trinor-PGF2alpha isopropyl ester                             | [M+Na] <sup>+</sup> | C26H38O5    | 453.26115                      | 453.26088                    | -0.6             | 3.5E+06     |
| 124 | 1alpha-hydroxy-24-methylsulfonyl-25,26,27-trinorvitamin D3             | [M+Na] <sup>+</sup> | C25H40O4S   | 459.25395                      | 459.25444                    | 1.1              | 1.4E+06     |
| 125 | Glutathionylspermidine                                                 | [M+K] <sup>+</sup>  | C17H34N6O5S | 473.19430                      | 473.19553                    | 2.6              | 2.9E+06     |
| 126 | C17 sphingosine-1-phosphocholine                                       | [M+Na] <sup>+</sup> | C22H47N2O5P | 473.31148                      | 473.31018                    | -2.7             | 1.3E+06     |
| 127 | Gentamicin X2                                                          | [M+H] <sup>+</sup>  | C19H38N4O10 | 483.26607                      | 483.26678                    | 1.5              | 4.6E+06     |
| 128 | cholesterol sulfate                                                    | [M+Na] <sup>+</sup> | C27H46O4S   | 489.30090                      | 489.30017                    | -1.5             | 3.6E+06     |
| 129 | Gentamicin C1                                                          | [M+Na] <sup>+</sup> | C21H43N5O7  | 500.30547                      | 500.30430                    | -2.3             | 2.1E+06     |
| 130 | 3-Geranyl-4,2',4',6'-tetrahydroxy-5-prenyldihydrochalcone              | [M+Na] <sup>+</sup> | C30H38O5    | 501.26115                      | 501.26258                    | 2.9              | 1.4E+07     |
| 131 | (6R)-1alpha,25-dihydroxyvitamin D3 6,19-sulfur dioxide adduct          | [M+Na] <sup>+</sup> | C27H44O5S   | 503.28017                      | 503.27936                    | -1.6             | 4.7E+06     |
| 132 | N-arachidonoyl tyrosine                                                | [M+K] <sup>+</sup>  | C29H41NO4   | 506.26672                      | 506.26562                    | -2.2             | 3.2E+06     |
| 133 | 29-demethylgeodisterol-O-sulfite                                       | [M+Na] <sup>+</sup> | C27H40O6S   | 515.24378                      | 515.24243                    | -2.6             | 1.7E+06     |
| 134 | 27-nor-campestan-nonol                                                 | [M+H] <sup>+</sup>  | C27H48O9    | 517.33711                      | 517.33569                    | -2.7             | 2.7E+06     |
| 135 | Mycalamide B                                                           | [M+H] <sup>+</sup>  | C25H43NO10  | 518.29597                      | 518.29484                    | -2.2             | 2.2E+06     |
| 136 | LysoPE(0:0/20:3(5Z,8Z,11Z))                                            | [M+Na] <sup>+</sup> | C25H46NO7P  | 526.29041                      | 526.28952                    | -1.7             | 1.6E+07     |
| 137 | geodisterol-O-sulfite                                                  | [M+Na] <sup>+</sup> | C28H42O6S   | 529.25943                      | 529.26016                    | 1.4              | 2.2E+06     |
| 138 | PG(20:4(5Z,8Z,11Z,14Z)/0:0)                                            | [M+H] <sup>+</sup>  | C26H45O9P   | 533.28740                      | 533.28790                    | 0.9              | 4.8E+06     |
| 139 | 11-(3-acetoxy-1-propynyl)-1alpha,25-dihydroxy-9,11-didehydrovitamin D3 | [M+Na] <sup>+</sup> | C32H46O5    | 533.32375                      | 533.32498                    | 2.3              | 4.3E+06     |
| 140 | Dihydromethanophenazine                                                | [M+H] <sup>+</sup>  | C37H52N2O   | 541.41524                      | 541.41468                    | -1.0             | 3.2E+06     |
| 141 | 2-deoxy-20-hydroxyecdysone 22-phosphate                                | [M+H] <sup>+</sup>  | C27H45O9P   | 545.28740                      | 545.28751                    | 0.2              | 2.0E+07     |
| 142 | Hygromycin A                                                           | [M+Cl] <sup>-</sup> | C23H29NO12  | 546.13838                      | 546.25951                    | -2.0             | 1.1E+06     |
| 143 | PS(17:0/0:0)                                                           | [M+Cl] <sup>-</sup> | C23H46NO9P  | 546.26042                      |                              | -1.7             | 4.9E+05     |
| 144 | Trihydroxy-27-carboxymethyl-5beta-cholestan-26-oic acid                | [M+K] <sup>+</sup>  | C29H48O7    | 547.30316                      | 547.30454                    | 2.5              | 6.2E+06     |
| 145 | DG(14:1(9Z)/14:1(9Z)/0:0)                                              | [M+K] <sup>+</sup>  | C31H56O5    | 547.37593                      | 547.37517                    | -1.4             | 6.1E+06     |
| 146 | (+)-Myristinin A                                                       | [M+H] <sup>+</sup>  | C33H40O7    | 549.28468                      | 549.28590                    | 2.2              | 9.6E+06     |
| 147 | PS(O-18:0/0:0)                                                         | [M+K] <sup>+</sup>  | C24H50NO8P  | 550.29056                      | 550.28924                    | -2.4             | 2.7E+06     |
| 148 | Enkephalin L                                                           | [M+H] <sup>+</sup>  | C28H37N5O7  | 556.27658                      | 556.27758                    | 1.8              | 3.1E+06     |
| 149 | PG(10:0/10:0)                                                          | [M+Na] <sup>+</sup> | C26H51O10P  | 577.31121                      | 577.31234                    | 2.0              | 2.7E+06     |

| #   | Putative Annotation (M) <sup>a</sup>              | Ion                 | Formula    | Theor. <i>m/z</i> <sup>b</sup> | Exp. <i>m/z</i> <sup>c</sup> | ppm <sup>d</sup> | Peak_Height |
|-----|---------------------------------------------------|---------------------|------------|--------------------------------|------------------------------|------------------|-------------|
| 150 | Prednisolone 21-all- <i>cis</i> -farnesylate      | [M+H] <sup>+</sup>  | C36H50O6   | 579.36802                      | 579.36847                    | 0.8              | 6.3E+06     |
| 151 | 2-deoxy-20-hydroxyecdysone 22-phosphate           | [M+K] <sup>+</sup>  | C27H45O9P  | 583.24328                      | 583.24263                    | -1.1             | 5.1E+06     |
| 152 | 5-Oxoavermectin "1a" aglycone                     | [M+H] <sup>+</sup>  | C34H46O8   | 583.32654                      | 583.32731                    | 1.3              | 2.1E+07     |
| 153 | 3-O-acetylcyclosporin 2-phosphate                 | [M+H] <sup>+</sup>  | C29H47O10P | 587.29796                      | 587.29968                    | 2.9              | 2.6E+06     |
| 154 | PC(O-20:0/O-1:0)                                  | [M+K] <sup>+</sup>  | C29H62NO6P | 590.39463                      | 590.39401                    | -1.1             | 3.4E+07     |
| 155 | Triterpenoid                                      | [M+K] <sup>+</sup>  | C30H48O7S  | 591.27523                      | 591.27404                    | -2.0             | 4.1E+06     |
| 156 | PA(12:0/16:1(9Z))                                 | [M+H] <sup>+</sup>  | C31H59O8P  | 591.40203                      | 591.40140                    | -1.1             | 9.3E+06     |
| 157 | Avermectin B1b aglycone                           | [M+K] <sup>+</sup>  | C33H46O8   | 609.28243                      | 609.28175                    | -1.1             | 6.7E+06     |
| 158 | PI(20:4(5Z,8Z,11Z,14Z)/0:0)                       | [M+H] <sup>+</sup>  | C29H49O12P | 621.30344                      | 621.30412                    | 1.1              | 2.9E+06     |
| 159 | 25-Hydroxyvitamin D2 25-(beta-glucuronide)        | [M+K] <sup>+</sup>  | C34H52O8   | 627.32938                      | 627.32987                    | 0.8              | 1.0E+07     |
| 160 | DG(18:4(6Z,9Z,12Z,15Z)/18:4(6Z,9Z,12Z,15Z)/0:0)   | [M+Na] <sup>+</sup> | C39H60O5   | 631.43330                      | 631.43177                    | -2.4             | 2.8E+06     |
| 161 | 4-Keto-4'-hydroxyalloxanthin                      | [M+K] <sup>+</sup>  | C40H50O4   | 633.33407                      | 633.33318                    | -1.4             | 2.0E+07     |
| 162 | PI(19:0/0:0)                                      | [M+Na] <sup>+</sup> | C28H55O12P | 637.33233                      | 637.33374                    | 2.2              | 4.2E+06     |
| 163 | Avermectin B2a aglycone                           | [M+K] <sup>+</sup>  | C34H50O9   | 641.30864                      | 641.30857                    | -0.1             | 4.8E+06     |
| 164 | PI(22:6(4Z,7Z,10Z,13Z,16Z,19Z)/0:0)               | [M+H] <sup>+</sup>  | C31H49O12P | 645.30344                      | 645.30476                    | 2.0              | 2.1E+06     |
| 165 | 6-Hydroxykaempferol 3,6-diglucoside               | [M+Na] <sup>+</sup> | C27H30O17  | 649.13752                      | 649.13846                    | 1.4              | 4.2E+06     |
| 166 | 6-O-(Glc)-5alpha-spirostan-3beta,6alpha,23S-triol | [M+Na] <sup>+</sup> | C34H58O10  | 649.39222                      | 649.39101                    | -1.9             | 5.4E+07     |
| 167 | PG(14:1(9Z)/14:1(9Z))                             | [M+H] <sup>+</sup>  | C34H63O10P | 663.42316                      | 663.42225                    | -1.4             | 1.8E+07     |
| 168 | PG(12:0/16:1(9Z))                                 | [M+H] <sup>+</sup>  | C34H65O10P | 665.43881                      | 665.43831                    | -0.8             | 5.2E+06     |
| 169 | DG(15:0/22:4(7Z,10Z,13Z,16Z)/0:0)                 | [M+K] <sup>+</sup>  | C40H70O5   | 669.48548                      | 669.48727                    | 2.7              | 2.7E+06     |
| 170 | Oleanoic acid 3-O-glucuronide                     | [M+K] <sup>+</sup>  | C36H56O9   | 671.35559                      | 671.35386                    | -2.6             | 1.1E+07     |
| 171 | PI(22:2(13Z,16Z)/0:0)                             | [M+Na] <sup>+</sup> | C31H57O12P | 675.34798                      | 675.34806                    | 0.1              | 3.0E+06     |
| 172 | PG(O-16:0/12:0)                                   | [M+Na] <sup>+</sup> | C34H69O9P  | 675.45714                      | 675.45800                    | 1.3              | 2.4E+06     |
| 173 | PA(12:0/20:5(5Z,8Z,11Z,14Z,17Z))                  | [M+K] <sup>+</sup>  | C35H59O8P  | 677.35791                      | 677.35665                    | -1.9             | 1.8E+07     |
| 174 | PG(12:0/17:2(9Z,12Z))                             | [M+H] <sup>+</sup>  | C35H65O10P | 677.43881                      | 677.43757                    | -1.8             | 1.2E+08     |
| 175 | PS(P-16:0/12:0)                                   | [M+Na] <sup>+</sup> | C34H66NO9P | 686.43674                      | 686.43504                    | -2.5             | 3.3E+06     |
| 176 | PI(22:2(13Z,16Z)/0:0)                             | [M+K] <sup>+</sup>  | C31H57O12P | 691.32192                      | 691.32373                    | 2.6              | 2.4E+06     |
| 177 | PI(22:1(11Z)/0:0)                                 | [M+K] <sup>+</sup>  | C31H59O12P | 693.33757                      | 693.33659                    | -1.4             | 1.3E+07     |
| 178 | PC(O-16:0/12:0)                                   | [M+K] <sup>+</sup>  | C36H74NO7P | 702.48345                      | 702.48509                    | 2.3              | 2.4E+06     |
| 179 | Pepstatin                                         | [M+Na] <sup>+</sup> | C34H63N5O9 | 708.45180                      | 708.45113                    | -0.9             | 3.9E+06     |

| #   | Putative Annotation (M) <sup>a</sup>                                       | Ion                 | Formula     | Theor. <i>m/z</i> <sup>b</sup> | Exp. <i>m/z</i> <sup>c</sup> | ppm <sup>d</sup> | Peak_Height |
|-----|----------------------------------------------------------------------------|---------------------|-------------|--------------------------------|------------------------------|------------------|-------------|
| 180 | DG(20:3(5Z,8Z,11Z)/22:6(4Z,7Z,10Z,13Z,16Z,19Z)/0:0)                        | [M+Na] <sup>+</sup> | C45H70O5    | 713.51155                      | 713.50991                    | -2.3             | 5.8E+06     |
| 181 | PG(12:0/20:2(11Z,14Z))                                                     | [M+H] <sup>+</sup>  | C38H71O10P  | 719.48576                      | 719.48549                    | -0.4             | 2.0E+06     |
| 182 | PG(O-16:0/16:1(9Z))                                                        | [M+Na] <sup>+</sup> | C38H75O9P   | 729.50409                      | 729.50403                    | -0.1             | 3.9E+06     |
| 183 | PC(O-14:0/16:0)                                                            | [M+K] <sup>+</sup>  | C38H78NO7P  | 730.51475                      | 730.51403                    | -1.0             | 2.2E+06     |
| 184 | PG(13:0/20:1(11Z))                                                         | [M+H] <sup>+</sup>  | C39H75O10P  | 735.51706                      | 735.51801                    | 1.3              | 5.1E+06     |
| 185 | PC(14:1(9Z)/P-18:1(11Z))                                                   | [M+Na] <sup>+</sup> | C40H76NO7P  | 736.52516                      | 736.52712                    | 2.7              | 1.8E+06     |
| 186 | PG(12:0/20:4(5Z,8Z,11Z,14Z))                                               | [M+Na] <sup>+</sup> | C38H67O10P  | 737.43641                      | 737.43759                    | 1.6              | 3.5E+07     |
| 187 | PS(13:0/18:2(9Z,12Z))                                                      | [M+Na] <sup>+</sup> | C37H68NO10P | 740.44730                      | 740.44578                    | -2.1             | 2.2E+06     |
| 188 | 1-(ladderane-hexanoyl)-2-(ladderane-octanyl)-sn-glycerophosphoethanolamine | [M+H] <sup>+</sup>  | C43H72NO7P  | 746.51192                      | 746.51190                    | 0.0              | 2.2E+06     |
| 189 | PS(P-16:0/17:2(9Z,12Z))                                                    | [M+Na] <sup>+</sup> | C39H72NO9P  | 752.48369                      | 752.48144                    | -3.0             | 1.9E+06     |
| 190 | Delavaine A                                                                | [M+K] <sup>+</sup>  | C38H54N2O11 | 753.33592                      | 753.33529                    | -0.8             | 1.9E+06     |
| 191 | PS(14:0/20:5(5Z,8Z,11Z,14Z,17Z))                                           | [M+H] <sup>+</sup>  | C40H68NO10P | 754.46536                      | 754.46421                    | -1.5             | 1.8E+06     |
| 192 | Spinolide A                                                                | [M+K] <sup>+</sup>  | C39H56O12   | 755.34034                      | 755.34193                    | 2.1              | 1.8E+06     |
| 193 | 2,3-Bis-O-(geranylgeranyl)glycerol 1-phosphate                             | [M+K] <sup>+</sup>  | C43H73O6P   | 755.47764                      | 755.47793                    | 0.4              | 2.0E+06     |
| 194 | PC(16:0/O-16:0)                                                            | [M+K] <sup>+</sup>  | C40H82NO7P  | 758.54605                      | 758.54577                    | -0.4             | 2.9E+06     |
| 195 | Myxochromide S1                                                            | [M+K] <sup>+</sup>  | C38H54N6O8  | 761.36347                      | 761.36457                    | 1.4              | 5.2E+06     |
| 196 | DG(22:1(13Z)/22:6(4Z,7Z,10Z,13Z,16Z,19Z)/0:0)                              | [M+K] <sup>+</sup>  | C47H78O5    | 761.54809                      | 761.54865                    | 0.7              | 4.3E+06     |
| 197 | 1-Hydroxyvitamin D3 cellobioside                                           | [M+K] <sup>+</sup>  | C39H64O12   | 763.40294                      | 763.40498                    | 2.7              | 2.4E+06     |
| 198 | PG(13:0/20:5(5Z,8Z,11Z,14Z,17Z))                                           | [M+K] <sup>+</sup>  | C39H67O10P  | 765.41034                      | 765.40849                    | -2.4             | 7.2E+06     |
| 199 | Mycolactone                                                                | [M+Na] <sup>+</sup> | C44H70O9    | 765.49120                      | 765.49264                    | 1.9              | 4.4E+07     |
| 200 | MGDG(18:5(3Z,6Z,9Z,12Z,15Z)/18:4(6Z,9Z,12Z,15Z))                           | [M+H] <sup>+</sup>  | C45H68O10   | 769.48852                      | 769.49049                    | 2.6              | 1.6E+06     |
| 201 | PG(14:1(9Z)/22:2(13Z,16Z))                                                 | [M+H] <sup>+</sup>  | C42H77O10P  | 773.53271                      | 773.53138                    | -1.7             | 3.6E+06     |
| 202 | PE(20:3(5Z,8Z,11Z)/P-18:1(11Z))                                            | [M+Na] <sup>+</sup> | C43H78NO7P  | 774.54081                      | 774.54043                    | -0.5             | 2.2E+06     |
| 203 | PI(P-16:0/15:1(9Z))                                                        | [M+H] <sup>+</sup>  | C40H75O12P  | 779.50689                      | 779.50882                    | 2.5              | 1.9E+06     |
| 204 | MGDG-O(16:3(7Z,10Z,13Z))                                                   | [M+Na] <sup>+</sup> | C43H68O11   | 783.46538                      | 783.46357                    | -2.3             | 4.3E+06     |
| 205 | 1-(ladderane-hexanoyl)-2-(ladderane-octanyl)-sn-glycerophosphoethanolamine | [M+K] <sup>+</sup>  | C43H72NO7P  | 784.46780                      | 784.46574                    | -2.6             | 1.6E+06     |
| 206 | PG(O-16:0/22:4(7Z,10Z,13Z,16Z))                                            | [M+H] <sup>+</sup>  | C44H81O9P   | 785.56910                      | 785.56776                    | -1.7             | 3.0E+06     |
| 207 | PG(O-16:0/20:4(5Z,8Z,11Z,14Z))                                             | [M+K] <sup>+</sup>  | C42H77O9P   | 795.49368                      | 795.49303                    | -0.8             | 2.5E+06     |
| 208 | GalCer(d18:0/20:0)                                                         | [M+K] <sup>+</sup>  | C44H87NO8   | 796.60633                      | 796.60572                    | -0.8             | 1.1E+06     |



| #   | Putative Annotation (M) <sup>a</sup>                                         | Ion                 | Formula      | Theor. <i>m/z</i> <sup>b</sup> | Exp. <i>m/z</i> <sup>c</sup> | ppm <sup>d</sup> | Peak_Height |
|-----|------------------------------------------------------------------------------|---------------------|--------------|--------------------------------|------------------------------|------------------|-------------|
| 209 | PG(O-16:0/20:3(8Z,11Z,14Z))                                                  | [M+K] <sup>+</sup>  | C42H79O9P    | 797.50933                      | 797.50929                    | -0.1             | 1.2E+06     |
| 210 | PG(13:0/22:2(13Z,16Z))                                                       | [M+K] <sup>+</sup>  | C41H77O10P   | 799.48859                      | 799.48946                    | 1.1              | 1.4E+06     |
| 211 | PG(17:0/20:4(5Z,8Z,11Z,14Z))                                                 | [M+H] <sup>+</sup>  | C43H80NO10P  | 802.55926                      | 802.56084                    | 2.0              | 3.1E+06     |
| 212 | PG(14:1(9Z)/22:6(4Z,7Z,10Z,13Z,16Z,19Z))                                     | [M+K] <sup>+</sup>  | C42H69O10P   | 803.42599                      | 803.42543                    | -0.7             | 4.6E+06     |
| 213 | PC(16:1(7Z)/22:6(4Z,7Z,10Z,13Z,16Z,19Z))                                     | [M+H] <sup>+</sup>  | C46H78NO8P   | 804.55378                      | 804.55613                    | 2.9              | 5.2E+06     |
| 214 | <i>N</i> -Acetyl-leu-leu-leu-leu-leu-tyr-amide                               | [M+Na] <sup>+</sup> | C41H69N7O8   | 810.50998                      | 810.51210                    | 2.6              | 8.8E+06     |
| 215 | PG(14:0/22:2(13Z,16Z))                                                       | [M+K] <sup>+</sup>  | C42H79O10P   | 813.50424                      | 813.50630                    | 2.5              | 1.2E+06     |
| 216 | 6'-Hydroxysiphonaxanthin dodecenoate                                         | [M+H] <sup>+</sup>  | C53H80O6     | 813.60277                      | 813.60147                    | -1.6             | 1.2E+06     |
| 217 | PC(15:0/22:4(7Z,10Z,13Z,16Z))                                                | [M+Na] <sup>+</sup> | C45H82NO8P   | 818.56703                      | 818.56564                    | -1.7             | 1.7E+06     |
| 218 | PI(13:0/20:1(11Z))                                                           | [M+H] <sup>+</sup>  | C42H79O13P   | 823.53311                      | 823.53554                    | 3.0              | 1.1E+06     |
| 219 | Trihydroxyspirostenyl O-alpha-L-rhamnopyranosyl-(1-2)-beta-D-glucopyranoside | [M+K] <sup>+</sup>  | C40H66O15    | 825.40333                      | 825.40413                    | 1.0              | 3.3E+06     |
| 220 | Oligomycin B                                                                 | [M+Na] <sup>+</sup> | C45H72O12    | 827.49160                      | 827.49246                    | 1.0              | 2.1E+06     |
| 221 | PG(16:0/22:0)                                                                | [M+Na] <sup>+</sup> | C44H87O10P   | 829.59291                      | 829.59346                    | 0.7              | 2.6E+06     |
| 222 | PI(P-18:0/17:2(9Z,12Z))                                                      | [M+H] <sup>+</sup>  | C44H81O12P   | 833.55384                      | 833.55275                    | -1.3             | 2.1E+06     |
| 223 | PA(22:0/22:6(4Z,7Z,10Z,13Z,16Z,19Z))                                         | [M+K] <sup>+</sup>  | C47H81O8P    | 843.53007                      | 843.53109                    | 1.2              | 9.6E+05     |
| 224 | PC(19:1(9Z)/22:6(4Z,7Z,10Z,13Z,16Z,19Z))                                     | [M+H] <sup>+</sup>  | C49H84NO8P   | 846.60073                      | 846.59977                    | -1.1             | 2.1E+06     |
| 225 | PE(20:5(5Z,8Z,11Z,14Z,17Z)/22:6(4Z,7Z,10Z,13Z,16Z,19Z))                      | [M+K] <sup>+</sup>  | C47H72NO8P   | 848.46271                      | 848.46155                    | -1.4             | 1.0E+06     |
| 226 | Thyroxine sulfate                                                            | [M+H] <sup>+</sup>  | C15H11I4NO7S | 857.65079                      | 857.64999                    | -0.9             | 8.7E+05     |
| 227 | PI(P-20:0/17:2(9Z,12Z))                                                      | [M+H] <sup>+</sup>  | C46H85O12P   | 861.58514                      | 861.58685                    | 2.0              | 1.6E+06     |
| 228 | PC(22:2(13Z,16Z)/P-18:1(11Z))                                                | [M+K] <sup>+</sup>  | C48H90NO7P   | 862.60865                      | 862.60788                    | -0.9             | 1.1E+06     |
| 229 | PGP(16:0/18:2(9Z,12Z))                                                       | [M+K] <sup>+</sup>  | C40H76O13P2  | 865.43928                      | 865.43753                    | -2.0             | 1.3E+06     |
| 230 | PG(20:2(11Z,14Z)/22:6(4Z,7Z,10Z,13Z,16Z,19Z))                                | [M+Na] <sup>+</sup> | C48H79O10P   | 869.53031                      | 869.52905                    | -1.4             | 2.6E+06     |
| 231 | PI(15:1(9Z)/22:4(7Z,10Z,13Z,16Z))                                            | [M+H] <sup>+</sup>  | C46H79O13P   | 871.53311                      | 871.53215                    | -1.1             | 1.2E+06     |
| 232 | PG(O-20:0/21:0)                                                              | [M+K] <sup>+</sup>  | C47H95O9P    | 873.63453                      | 873.63346                    | -1.2             | 1.7E+06     |
| 233 | PG(20:1(11Z)/22:4(7Z,10Z,13Z,16Z))                                           | [M+Na] <sup>+</sup> | C48H85O10P   | 875.57726                      | 875.57491                    | -2.7             | 8.8E+05     |
| 234 | PGP(16:1(9Z)/20:4(5Z,8Z,11Z,14Z))                                            | [M+K] <sup>+</sup>  | C42H74O13P2  | 887.42363                      | 887.42363                    | 0.0              | 9.7E+05     |
| 235 | PI(18:4(6Z,9Z,12Z,15Z)/18:4(6Z,9Z,12Z,15Z))                                  | [M+K] <sup>+</sup>  | C45H71O13P   | 889.42639                      | 889.42660                    | 0.2              | 9.6E+05     |
| 236 | PI(15:0/22:6(4Z,7Z,10Z,13Z,16Z,19Z))                                         | [M+Na] <sup>+</sup> | C46H77O13P   | 891.49940                      | 891.49691                    | -2.8             | 1.1E+06     |
| 237 | PGP(18:0/18:1(11Z))                                                          | [M+K] <sup>+</sup>  | C42H82O13P2  | 895.48623                      | 895.48553                    | -0.8             | 1.1E+06     |
| 238 | PS(21:0/22:1(11Z))                                                           | [M+Na] <sup>+</sup> | C49H94NO10P  | 910.65076                      | 910.64966                    | -1.2             | 9.8E+05     |

| #   | Putative Annotation (M) <sup>a</sup>        | Ion                | Formula    | Theor. <i>m/z</i> <sup>b</sup> | Exp. <i>m/z</i> <sup>c</sup> | ppm <sup>d</sup> | Peak_Height |
|-----|---------------------------------------------|--------------------|------------|--------------------------------|------------------------------|------------------|-------------|
| 239 | PI(18:3(6Z,9Z,12Z)/20:5(5Z,8Z,11Z,14Z,17Z)) | [M+K] <sup>+</sup> | C47H75O13P | 917.45769                      | 917.45512                    | -2.8             | 1.4E+06     |
| 240 | PI(19:0/22:2(13Z,16Z))                      | [M+H] <sup>+</sup> | C50H93O13P | 933.64266                      | 933.64068                    | -2.1             | 9.3E+05     |
| 241 | PI(O-20:0/20:3(8Z,11Z,14Z))                 | [M+K] <sup>+</sup> | C49H91O12P | 941.58797                      | 941.58682                    | -1.2             | 1.3E+06     |

<sup>a</sup>Cer: Ceramide; GalCer: Galactosylceramide; GlcCer: Glucosylceramide; Glc-GP: phosphatidylglucose; LacCer: Lactosylceramide; MG: Monoacylglycerol; DAT: Acyltrehaloses; DG: Diacylglycerol; TG: Triacylglycerol; MGDG: Monoacyldiacylglycerol; PA: Phosphatidic acid; PC: Phosphatidylcholine; PE: Phosphatidylethanolamine; PG: Glycerophospholipids; PI: Phosphatidylinositol; PIP2: phosphatidylinositol biphosphate; PS: Phosphatidylserine; SM: Sphingomyelin.

<sup>b</sup>Theor. stands for calculated exact mass to charge ratio.

<sup>c</sup>Exp. stands for experimental *m/z* value.

<sup>d</sup>The error expressed in parts per million (ppm).

**Table S2.** ESI FT-ICR MS comprehensive list of metabolites detected in pMVs extract.

| #  | Putative Annotation (M) <sup>a</sup>        | Ion     | Formula   | Theor. $m/z^b$ | Exp. $m/z^c$ | ppm <sup>d</sup> | Peak_Height |
|----|---------------------------------------------|---------|-----------|----------------|--------------|------------------|-------------|
| 1  | Succinic acid                               | [M-H]-  | C4H6O4    | 117.01933      | 117.01951    | 1.5              | 7.4E+05     |
| 2  | (R)-Malate                                  | [M-H]-  | C4H6O5    | 133.01425      | 133.01426    | 0.1              | 2.9E+05     |
| 3  | (R)-3-Hydroxy-3-methyl-2-oxopentanoate      | [M-H]-  | C6H10O4   | 145.05063      | 145.05051    | -0.8             | 2.3E+05     |
| 4  | D-Glutamate                                 | [M-H]-  | C5H9NO4   | 146.04588      | 146.04588    | 0.0              | 4.3E+06     |
| 5  | (R)-2-Hydroxyglutarate                      | [M-H]-  | C5H8O5    | 147.02990      | 147.02955    | -2.4             | 2.7E+05     |
| 6  | Triethanolamine                             | [M+H]+  | C6H15NO3  | 150.11247      | 150.11243    | -0.3             | 5.4E+05     |
| 7  | Diethylphosphate                            | [M-H]-  | C4H11O4P  | 153.03222      | 153.03198    | -1.6             | 4.8E+05     |
| 8  | 5-Hydroxypentanoate                         | [M+Cl]- | C5H10O3   | 153.03240      | 153.03198    | -2.7             | 4.8E+05     |
| 9  | D-Glutamic acid                             | [M+Na]+ | C5H9NO4   | 170.04238      | 170.04202    | -2.1             | 4.3E+05     |
| 10 | L-Arginine                                  | [M+H]+  | C6H14N4O2 | 175.11895      | 175.11888    | -0.4             | 9.4E+06     |
| 11 | <i>cis</i> -2-Carboxycyclohexyl-acetic acid | [M-H]-  | C9H14O4   | 185.08193      | 185.08150    | -2.3             | 3.0E+05     |
| 12 | Quinic acid                                 | [M-H]-  | C7H12O6   | 191.05611      | 191.05610    | -0.1             | 2.1E+06     |
| 13 | 2-Aminomuconate                             | [M+Cl]- | C6H7NO4   | 192.00691      | 192.00714    | 1.2              | 3.2E+05     |
| 14 | 3-Hydroxy-L-glutamate                       | [M+K]+  | C5H9NO5   | 202.01123      | 202.01183    | 3.0              | 4.5E+05     |
| 15 | Aldohexose                                  | [M+Na]+ | C6H12O6   | 203.05261      | 203.05271    | 0.5              | 6.8E+06     |
| 16 | Mannitol                                    | [M+Na]+ | C6H14O6   | 205.06826      | 205.06859    | 1.6              | 3.7E+05     |
| 17 | (+)-3-hydroxy pelargonic acid               | [M+Cl]- | C9H18O3   | 209.09500      | 209.09442    | -2.8             | 6.4E+05     |
| 18 | Aldohexose                                  | [M+Cl]- | C6H12O6   | 215.03279      | 215.03218    | -2.8             | 8.8E+05     |
| 19 | Myristic acid                               | [M-H]-  | C14H28O2  | 227.20175      | 227.20165    | 0.4              | 8.5E+05     |
| 20 | Sinapyl alcohol                             | [M+Na]+ | C11H14O4  | 233.07843      | 233.07905    | 2.7              | 7.2E+05     |
| 21 | Dimethylenetriurea                          | [M+Cl]- | C5H12N6O3 | 239.06649      | 239.06706    | 2.4              | 3.9E+05     |
| 22 | Glutinosone                                 | [M+Na]+ | C14H20O2  | 243.13555      | 243.13572    | 0.7              | 3.8E+05     |
| 23 | 1-Octylglycerol                             | [M+K]+  | C11H24O3  | 243.13570      | 243.13572    | 0.1              | 3.8E+05     |
| 24 | 1,3,7-Trimethyluric acid                    | [M+Cl]- | C8H10N4O3 | 245.04469      | 245.04514    | 1.8              | 2.6E+05     |
| 25 | Pimpinellin                                 | [M-H]-  | C13H10O5  | 245.04555      | 245.04514    | -1.7             | 2.6E+05     |
| 26 | 2E,4E,8E,10E-Dodecatetraenedioic acid       | [M+Na]+ | C12H14O4  | 245.07843      | 245.07862    | 0.8              | 4.0E+05     |
| 27 | Enecalinal                                  | [M+Na]+ | C14H16O3  | 255.09917      | 255.09924    | 0.3              | 5.6E+05     |
| 28 | Undecanedioic acid                          | [M+K]+  | C11H20O4  | 255.09932      | 255.09997    | 2.6              | 5.4E+05     |
| 29 | Palmitic acid                               | [M-H]-  | C16H32O2  | 255.23295      | 255.23271    | -1.0             | 2.2E+06     |

| #  | Putative Annotation (M) <sup>a</sup>                               | Ion     | Formula      | Theor. <i>m/z</i> <sup>b</sup> | Exp. <i>m/z</i> <sup>c</sup> | ppm <sup>d</sup> | Peak_Height |
|----|--------------------------------------------------------------------|---------|--------------|--------------------------------|------------------------------|------------------|-------------|
| 30 | 6-Hydroxyl-1,6-dihydropurine ribonucleoside                        | [M-H]-  | C10H14N4O5   | 269.08914                      | 269.08850                    | -2.4             | 1.0E+06     |
| 31 | (+)-15S-hydroxy-hexadecanoic acid                                  | [M-H]-  | C16H32O3     | 271.22787                      | 271.22718                    | -2.5             | 2.8E+05     |
| 32 | 11-hydroxy palmitic acid                                           | [M-H]-  | C16H32O3     | 271.22787                      | 271.22718                    | -2.5             | 2.8E+05     |
| 33 | 1,2-Bis(4-nitrophenyl)ethane                                       | [M+H]+  | C14H12N2O4   | 273.08698                      | 273.08770                    | 2.6              | 6.4E+05     |
| 34 | Oleic acid                                                         | [M-H]-  | C18H34O2     | 281.24860                      | 281.24894                    | 1.2              | 4.4E+06     |
| 35 | (11E)-Octadecenoic acid                                            | [M+H]+  | C18H34O2     | 283.26316                      | 283.26290                    | -0.9             | 5.3E+05     |
| 36 | Stearic acid                                                       | [M-H]-  | C18H36O2     | 283.26425                      | 283.26489                    | 2.2              | 2.0E+06     |
| 37 | <i>N</i> -Glycosyl-L-asparagine                                    | [M-H]-  | C10H18N2O8   | 293.09904                      | 293.09827                    | -2.6             | 1.1E+06     |
| 38 | ( <i>R</i> )-10-Hydroxystearate                                    | [M-H]-  | C18H36O3     | 299.25917                      | 299.25922                    | 0.2              | 2.5E+06     |
| 39 | Dibutyl phthalate                                                  | [M+Na]+ | C16H22O4     | 301.14103                      | 301.14078                    | -0.8             | 3.1E+06     |
| 40 | MG(0:0/14:0/0:0)                                                   | [M-H]-  | C17H34O4     | 301.23843                      | 301.23780                    | -2.1             | 6.8E+05     |
| 41 | 3"-Deamino-3"-oxonicotianamine                                     | [M+H]+  | C12H18N2O7   | 303.11868                      | 303.11817                    | -1.7             | 5.9E+05     |
| 42 | Linoleic acid                                                      | [M+Na]+ | C18H32O2     | 303.22945                      | 303.23007                    | 2.0              | 2.0E+06     |
| 43 | alpha-Obscurine                                                    | [M+Cl]- | C17H26N2O    | 309.17392                      | 309.17482                    | 2.9              | 4.5E+05     |
| 44 | 17beta-Hydroxy-3-methoxyestra-1,3,5(10)-triene-17-carbonitrile     | [M-H]-  | C20H25NO2    | 310.18125                      | 310.18053                    | -2.3             | 3.4E+05     |
| 45 | Spiradine A                                                        | [M-H]-  | C20H25NO2    | 310.18125                      | 310.18053                    | -2.3             | 3.4E+05     |
| 46 | Phytosphingosine                                                   | [M+H]+  | C18H39NO3    | 318.30027                      | 318.30049                    | 0.7              | 3.3E+06     |
| 47 | 1-Carbazol-9-yl-3-(3,5-dimethylpyrazol-1-yl)-propan-2-ol           | [M+H]+  | C20H21N3O    | 320.17574                      | 320.17597                    | 0.7              | 1.3E+06     |
| 48 | 16-oxo-octadecanoic acid                                           | [M+Na]+ | C18H34O3     | 321.24002                      | 321.24022                    | 0.6              | 6.8E+06     |
| 49 | ( <i>R</i> )-10-Hydroxystearate                                    | [M+Na]+ | C18H36O3     | 323.25567                      | 323.25537                    | -0.9             | 4.9E+07     |
| 50 | Galactosylhydroxylysine                                            | [M+H]+  | C12H24N2O8   | 325.16054                      | 325.15984                    | -2.2             | 8.3E+05     |
| 51 | Tributyrin                                                         | [M+Na]+ | C15H26O6     | 325.16216                      | 325.16285                    | 2.1              | 8.5E+05     |
| 52 | ( <i>Z</i> )-11beta,21-Dihydroxypregna-1,4,17(20)-trien-3-one      | [M+H]+  | C21H28O3     | 329.21112                      | 329.21040                    | -2.2             | 1.3E+06     |
| 53 | Lipoyllysine                                                       | [M+H]+  | C14H26N2O3S2 | 335.14576                      | 335.14657                    | 2.4              | 1.3E+06     |
| 54 | ( <i>R</i> )-10-Hydroxystearate                                    | [M+Cl]- | C18H36O3     | 335.23585                      | 335.23600                    | 0.5              | 3.3E+05     |
| 55 | (9 <i>Z</i> )-(7 <i>S</i> ,8 <i>S</i> )-Dihydroxyoctadecenoic acid | [M+Na]+ | C18H34O4     | 337.23493                      | 337.23533                    | 1.2              | 3.1E+06     |
| 56 | (20 <i>R</i> )-20-hydroxypregn-4-en-3-one                          | [M+Na]+ | C21H32O2     | 339.22945                      | 339.22926                    | -0.6             | 3.3E+06     |
| 57 | Palustrine                                                         | [M+K]+  | C17H31N3O2   | 348.20479                      | 348.20567                    | 2.5              | 9.0E+05     |
| 58 | 2-hydroxy-eicosanoic acid                                          | [M+Na]+ | C20H40O3     | 351.28697                      | 351.28738                    | 1.2              | 1.2E+06     |
| 59 | Biflorin                                                           | [M-H]-  | C16H18O9     | 353.08781                      | 353.08775                    | -0.2             | 5.6E+07     |

| #  | Putative Annotation (M) <sup>a</sup>                                         | Ion                 | Formula     | Theor. <i>m/z</i> <sup>b</sup> | Exp. <i>m/z</i> <sup>c</sup> | ppm <sup>d</sup> | Peak_Height |
|----|------------------------------------------------------------------------------|---------------------|-------------|--------------------------------|------------------------------|------------------|-------------|
| 60 | MG(0:0/16:0/0:0)                                                             | [M+Na] <sup>+</sup> | C19H38O4    | 353.26623                      | 353.26639                    | 0.5              | 1.1E+07     |
| 61 | 6,7-Dimethyl-8-(1-D-ribose)lumazine                                          | [M+Cl] <sup>-</sup> | C13H18N4O6  | 361.09204                      | 361.09281                    | 2.1              | 4.3E+05     |
| 62 | 5,7,3'-Trihydroxy-6,4',5'-trimethoxyflavanone                                | [M-H] <sup>-</sup>  | C18H18O8    | 361.09289                      | 361.09281                    | -0.2             | 4.3E+05     |
| 63 | 5-Hydroxy-3',4'-methylenedioxy-6'',6''-dimethylpyrano[2'',3'':7,8]isoflavone | [M+H] <sup>+</sup>  | C21H16O6    | 365.10196                      | 365.10164                    | -0.9             | 1.7E+06     |
| 64 | (+)-18-methyl-eicosanoic acid                                                | [M+K] <sup>+</sup>  | C21H42O2    | 365.28164                      | 365.28119                    | -1.2             | 8.2E+05     |
| 65 | (2S)-5,7-Dimethoxy-3',4'-methylenedioxyflavanone                             | [M+K] <sup>+</sup>  | C18H16O6    | 367.05785                      | 367.05864                    | 2.2              | 1.6E+06     |
| 66 | 3,4-Dimethoxyonchocarpin                                                     | [M+H] <sup>+</sup>  | C22H22O5    | 367.15400                      | 367.15379                    | -0.6             | 8.6E+05     |
| 67 | (3S,4S)-3-Hydroxytetradecane-1,3,4-tricarboxylate                            | [M+Na] <sup>+</sup> | C17H30O7    | 369.18837                      | 369.18749                    | -2.4             | 1.2E+06     |
| 68 | 3-Oxochola-1,4,6-trien-24-oic Acid                                           | [M+H] <sup>+</sup>  | C24H32O3    | 369.24242                      | 369.24198                    | -1.2             | 9.1E+05     |
| 69 | Sativic acid                                                                 | [M+Na] <sup>+</sup> | C18H36O6    | 371.24041                      | 371.24059                    | 0.5              | 8.3E+05     |
| 70 | 17beta-(Acetylthio)estra-1,3,5(10)-trien-3-ol acetate                        | [M+H] <sup>+</sup>  | C22H28O3S   | 373.18319                      | 373.18209                    | -3.0             | 2.5E+06     |
| 71 | 2,3-di-O-hexanoyl-alpha-glucopyranose                                        | [M+H] <sup>+</sup>  | C18H32O8    | 377.21699                      | 377.21615                    | -2.2             | 8.7E+05     |
| 72 | 1alpha,5alpha-Dimercaptoandrostane-3alpha,17beta-diol                        | [M+Na] <sup>+</sup> | C19H32O2S2  | 379.17359                      | 379.17312                    | -1.2             | 1.0E+07     |
| 73 | 9,10-Dihydrokadsurenone                                                      | [M+Na] <sup>+</sup> | C21H26O5    | 381.16724                      | 381.16735                    | 0.3              | 7.8E+05     |
| 74 | 2,3-Dinor-6-keto-prostaglandin F1 a                                          | [M+K] <sup>+</sup>  | C18H30O6    | 381.16740                      | 381.16735                    | -0.1             | 7.8E+05     |
| 75 | MG(0:0/18:0/0:0)                                                             | [M+Na] <sup>+</sup> | C21H42O4    | 381.29753                      | 381.29751                    | -0.1             | 1.0E+07     |
| 76 | 16-Methoxy-2,3-dihydro-3-hydroxytabersonine                                  | [M-H] <sup>-</sup>  | C22H28N2O4  | 383.19763                      | 383.19864                    | 2.6              | 3.9E+05     |
| 77 | 11-deoxy-11-methylene-15-keto-PGD2                                           | [M+Cl] <sup>-</sup> | C21H32O4    | 383.19946                      | 383.19864                    | -2.1             | 3.9E+05     |
| 78 | Macrozamin                                                                   | [M+H] <sup>+</sup>  | C13H24N2O11 | 385.14529                      | 385.14416                    | -2.9             | 1.0E+06     |
| 79 | 6-Deoxyerythronolide B                                                       | [M+H] <sup>+</sup>  | C21H38O6    | 387.27412                      | 387.27477                    | 1.7              | 1.2E+06     |
| 80 | N,N-(2,2-dihydroxy-ethyl)arachidonoyl amine                                  | [M-H] <sup>-</sup>  | C24H41NO3   | 390.30137                      | 390.30104                    | -0.8             | 8.2E+05     |
| 81 | 11-Dehydro-thromboxane B2                                                    | [M+Na] <sup>+</sup> | C20H32O6    | 391.20911                      | 391.20957                    | 1.2              | 1.3E+06     |
| 82 | 5,7,3',4'-Tetrahydroxy-8-prenylflavone                                       | [M+K] <sup>+</sup>  | C20H18O6    | 393.07350                      | 393.07449                    | 2.5              | 2.7E+06     |
| 83 | 9'-carboxy-gamma-tocotrienol                                                 | [M+Na] <sup>+</sup> | C23H31O4    | 394.21146                      | 394.21234                    | 2.2              | 1.2E+07     |
| 84 | 3-Deoxyvitamin D3                                                            | [M+Cl] <sup>-</sup> | C27H44      | 403.31370                      | 403.31433                    | 1.6              | 4.7E+05     |
| 85 | 3',5'-Diprenylgenistein                                                      | [M+H] <sup>+</sup>  | C25H26O5    | 407.18530                      | 407.18519                    | -0.3             | 7.6E+06     |
| 86 | Propantheline                                                                | [M+K] <sup>+</sup>  | C23H30NO3   | 407.18573                      | 407.18519                    | -1.3             | 7.6E+06     |
| 87 | 9'-Carboxy-alpha-tocotrienol                                                 | [M+Na] <sup>+</sup> | C24H33O4    | 408.22711                      | 408.22792                    | 2.0              | 8.3E+06     |
| 88 | 1-Isomangostin                                                               | [M+H] <sup>+</sup>  | C24H26O6    | 411.18022                      | 411.18027                    | 0.1              | 1.3E+06     |
| 89 | Rehmannioside A                                                              | [M+Na] <sup>+</sup> | C19H34O8    | 413.21459                      | 413.21340                    | -2.9             | 2.0E+06     |

| #   | Putative Annotation (M) <sup>a</sup>                                 | Ion                 | Formula     | Theor. <i>m/z</i> <sup>b</sup> | Exp. <i>m/z</i> <sup>c</sup> | ppm <sup>d</sup> | Peak_Height |
|-----|----------------------------------------------------------------------|---------------------|-------------|--------------------------------|------------------------------|------------------|-------------|
| 90  | (22E)-3alpha,12alpha-Dihydroxy-5beta-chole-22-en-24-oic Acid         | [M+Na] <sup>+</sup> | C24H38O4    | 413.26623                      | 413.26655                    | 0.8              | 3.4E+06     |
| 91  | 25-azavitamin D3                                                     | [M+Cl] <sup>-</sup> | C26H43NO    | 420.30387                      | 420.30360                    | -0.6             | 7.5E+05     |
| 92  | (2S)-5,7,2',4'-Tetrahydroxy-8-prenyl-5'-(1,1-dimethylallyl)flavanone | [M+H] <sup>+</sup>  | C25H28O6    | 425.19587                      | 425.19690                    | 2.4              | 1.7E+06     |
| 93  | LysoPC(10:0)                                                         | [M+Na] <sup>+</sup> | C18H39NO7P  | 435.23563                      | 435.23535                    | -0.7             | 1.6E+06     |
| 94  | Lunarine                                                             | [M+H] <sup>+</sup>  | C25H31N3O4  | 438.23873                      | 438.23919                    | 1.0              | 1.3E+07     |
| 95  | (24E)-24,26-dimethyl-desmosterol                                     | [M+Cl] <sup>-</sup> | C29H48O     | 447.33992                      | 447.34092                    | 2.2              | 2.8E+05     |
| 96  | 3'-Prenylrubranine                                                   | [M+H] <sup>+</sup>  | C30H34O4    | 459.25299                      | 459.25432                    | 2.9              | 1.9E+06     |
| 97  | Artonin E                                                            | [M+Cl] <sup>-</sup> | C25H24O7    | 471.12160                      | 471.12087                    | -1.6             | 2.7E+05     |
| 98  | Glabrescione B                                                       | [M+Na] <sup>+</sup> | C27H30O6    | 473.19346                      | 473.19458                    | 2.4              | 1.3E+06     |
| 99  | Glutathionylspermidine                                               | [M+K] <sup>+</sup>  | C17H34N6O5S | 473.19430                      | 473.19503                    | 1.5              | 1.3E+06     |
| 100 | 7-O-Methyllicoricidin                                                | [M+K] <sup>+</sup>  | C27H34O5    | 477.20378                      | 477.20471                    | 1.9              | 2.4E+06     |
| 101 | Gentamicin X2                                                        | [M+H] <sup>+</sup>  | C19H38N4O10 | 483.26607                      | 483.26733                    | 2.6              | 2.4E+06     |
| 102 | Microleulin                                                          | [M+H] <sup>+</sup>  | C29H34O7    | 495.23773                      | 495.23727                    | -0.9             | 8.3E+06     |
| 103 | 3-Sulfodeoxycholic acid                                              | [M+Na] <sup>+</sup> | C24H40O7S   | 495.23870                      | 495.23727                    | -2.9             | 8.3E+06     |
| 104 | 1-O-all-trans-retinoyl-beta-glucuronic acid                          | [M+Na] <sup>+</sup> | C26H36O8    | 499.23024                      | 499.23170                    | 2.9              | 1.3E+06     |
| 105 | Drummondin A                                                         | [M+H] <sup>+</sup>  | C28H34O8    | 499.23264                      | 499.23244                    | -0.4             | 1.6E+06     |
| 106 | PC(P-15:0/0:0)                                                       | [M+K] <sup>+</sup>  | C23H48NO6P  | 504.28508                      | 504.28423                    | -1.7             | 2.1E+06     |
| 107 | 3-Geranyl-4,2',4',6'-tetrahydroxy-5-prenyldihydrochalcone            | [M+K] <sup>+</sup>  | C30H38O5    | 517.23508                      | 517.23651                    | 2.8              | 1.9E+06     |
| 108 | Mycalamide B                                                         | [M+H] <sup>+</sup>  | C25H43NO10  | 518.29597                      | 518.29704                    | 2.1              | 1.4E+06     |
| 109 | 3-O-L-rhamnosyl-3-hydroxydecanoyl-3-hydroxydecanoic acid             | [M+H] <sup>+</sup>  | C27H50O9    | 519.35276                      | 519.35295                    | 0.4              | 2.2E+06     |
| 110 | LysoPE(0:0/20:3(11Z,14Z,17Z))                                        | [M+Na] <sup>+</sup> | C25H46NO7P  | 526.29041                      | 526.29007                    | -0.6             | 8.8E+06     |
| 111 | LysoPC(18:3(6Z,9Z,12Z))                                              | [M+Na] <sup>+</sup> | C26H48NO7P  | 540.30606                      | 540.30489                    | -2.2             | 7.7E+06     |
| 112 | Cucurbitacin F                                                       | [M+Na] <sup>+</sup> | C30H46O7    | 541.31357                      | 541.31274                    | -1.5             | 2.2E+06     |
| 113 | dolichyl diphosphate                                                 | [M+Na] <sup>+</sup> | C25H46O7P2  | 543.26110                      | 543.26123                    | 0.2              | 1.5E+06     |
| 114 | 2alpha-(benzyloxy)-1alpha,25-dihydroxy-19-norvitamin D3              | [M+Cl] <sup>-</sup> | C33H50O4    | 545.34031                      | 545.34111                    | 1.5              | 2.9E+05     |
| 115 | 1-octadecyl-11E-hexadecenoate                                        | [M+K] <sup>+</sup>  | C34H66O2    | 545.46944                      | 545.47005                    | 1.1              | 1.8E+06     |
| 116 | Coumermic acid                                                       | [M-H] <sup>-</sup>  | C27H21N3O10 | 546.11542                      | 546.11523                    | -0.3             | 2.6E+05     |
| 117 | LysoPE(0:0/20:1(11Z))                                                | [M+K] <sup>+</sup>  | C25H50NO7P  | 546.29565                      | 546.29467                    | -1.8             | 2.5E+06     |
| 118 | 3-O-Mycarosylerythronolide B                                         | [M+H] <sup>+</sup>  | C28H50O10   | 547.34767                      | 547.34856                    | 1.6              | 3.0E+06     |
| 119 | LysoPC(17:0)                                                         | [M+K] <sup>+</sup>  | C25H52NO7P  | 548.31130                      | 548.31178                    | 0.9              | 2.4E+06     |

| #   | Putative Annotation (M) <sup>a</sup>                             | Ion                 | Formula    | Theor. <i>m/z</i> <sup>b</sup> | Exp. <i>m/z</i> <sup>c</sup> | ppm <sup>d</sup> | Peak_Height |
|-----|------------------------------------------------------------------|---------------------|------------|--------------------------------|------------------------------|------------------|-------------|
| 120 | (+)-Myristinin A                                                 | [M+H] <sup>+</sup>  | C33H40O7   | 549.28468                      | 549.28565                    | 1.8              | 2.5E+06     |
| 121 | Enkephalin L                                                     | [M+H] <sup>+</sup>  | C28H37N5O7 | 556.27658                      | 556.27760                    | 1.8              | 4.1E+06     |
| 122 | PG(22:4(7Z,10Z,13Z,16Z)/0:0)                                     | [M+H] <sup>+</sup>  | C28H49O9P  | 561.31870                      | 561.31999                    | 2.3              | 4.6E+06     |
| 123 | 1-Oleoylglycerophosphocholine                                    | [M+K] <sup>+</sup>  | C26H53NO7P | 561.31912                      | 561.31999                    | 1.5              | 4.6E+06     |
| 124 | LysoPE(0:0/22:4(7Z,10Z,13Z,16Z))                                 | [M+K] <sup>+</sup>  | C27H48NO7P | 568.28000                      | 568.28152                    | 2.7              | 2.1E+06     |
| 125 | PC(O-18:0/O-2:0)                                                 | [M+K] <sup>+</sup>  | C28H60NO6P | 576.37898                      | 576.37812                    | -1.5             | 1.3E+06     |
| 126 | 6,8a-Seco-6,8a-deoxy-5-oxoavermectin "1b" aglycone               | [M+Na] <sup>+</sup> | C33H46O7   | 577.31357                      | 577.31461                    | 1.8              | 2.8E+06     |
| 127 | Prednisolone 21-all-cis-farnesylate                              | [M+H] <sup>+</sup>  | C36H50O6   | 579.36802                      | 579.36906                    | 1.8              | 4.6E+06     |
| 128 | Dihydromethanophenazine                                          | [M+K] <sup>+</sup>  | C37H52N2O  | 579.37112                      | 579.37014                    | -1.7             | 4.6E+06     |
| 129 | 2-deoxy-20-hydroxyecdysone 22-phosphate                          | [M+K] <sup>+</sup>  | C27H45O9P  | 583.24328                      | 583.24213                    | -2.0             | 3.5E+06     |
| 130 | 5-Oxoavermectin "1a" aglycone                                    | [M+H] <sup>+</sup>  | C34H46O8   | 583.32654                      | 583.32712                    | 1.0              | 1.9E+07     |
| 131 | (3Z)-Phycocyanobilin                                             | [M+H] <sup>+</sup>  | C33H38N4O6 | 587.28641                      | 587.28549                    | -1.6             | 1.3E+06     |
| 132 | LysoPC(22:6(4Z,7Z,10Z,13Z,16Z,19Z))                              | [M+Na] <sup>+</sup> | C30H50NO7P | 590.32171                      | 590.32076                    | -1.6             | 2.3E+06     |
| 133 | PC(16:0/3:0)                                                     | [M+K] <sup>+</sup>  | C27H54NO8P | 590.32186                      | 590.32076                    | -1.9             | 2.3E+06     |
| 134 | LysoPC(22:5(4Z,7Z,10Z,13Z,16Z))                                  | [M+Na] <sup>+</sup> | C30H52NO7P | 592.33736                      | 592.33812                    | 1.3              | 2.0E+06     |
| 135 | Docosyl-palmitate                                                | [M+Cl] <sup>-</sup> | C38H76O2   | 599.55393                      | 599.55252                    | -2.4             | 2.7E+06     |
| 136 | 3-O-acetylcaldysone 2-phosphate                                  | [M+Na] <sup>+</sup> | C29H47O10P | 609.27991                      | 609.28142                    | 2.5              | 2.7E+06     |
| 137 | Avermectin B1b aglycone                                          | [M+K] <sup>+</sup>  | C33H46O8   | 609.28243                      | 609.28183                    | -1.0             | 2.7E+06     |
| 138 | 7,8,7',8'-Tetrahydroastaxanthin                                  | [M+Na] <sup>+</sup> | C40H48O4   | 615.34448                      | 615.34602                    | 2.5              | 1.1E+06     |
| 139 | PC(O-12:0/O-12:0)                                                | [M+Na] <sup>+</sup> | C32H68NO6P | 616.46765                      | 616.46640                    | -2.0             | 1.2E+06     |
| 140 | DG(14:0/22:4(7Z,10Z,13Z,16Z)/0:0)                                | [M+H] <sup>+</sup>  | C39H68O5   | 617.51395                      | 617.51550                    | 2.5              | 1.1E+06     |
| 141 | 5-Oxoavermectin "2b" aglycone                                    | [M+K] <sup>+</sup>  | C33H46O9   | 625.27734                      | 625.27694                    | -0.6             | 1.3E+06     |
| 142 | Gambogic acid                                                    | [M+H] <sup>+</sup>  | C38H44O8   | 629.31089                      | 629.31050                    | -0.6             | 5.7E+06     |
| 143 | Mancinellin                                                      | [M+Na] <sup>+</sup> | C36H52O8   | 635.35544                      | 635.35524                    | -0.3             | 2.8E+06     |
| 144 | 26-O-[beta-D-glucopyranosyl]-25R-furostan-3beta,22alpha,26-triol | [M+K] <sup>+</sup>  | C33H56O9   | 635.35559                      | 635.35524                    | -0.6             | 2.8E+06     |
| 145 | Avermectin A2b aglycone                                          | [M+K] <sup>+</sup>  | C34H50O9   | 641.30864                      | 641.30908                    | 0.7              | 1.7E+06     |
| 146 | 6-O-(Glc)-25R)-5alpha-spirostan-3beta,6alpha,23S-triol           | [M+Na] <sup>+</sup> | C34H58O10  | 649.39222                      | 649.39351                    | 2.0              | 5.2E+06     |
| 147 | PI(22:2(13Z,16Z)/0:0)                                            | [M-H] <sup>-</sup>  | C31H57O12P | 651.35149                      | 651.35238                    | 1.4              | 2.7E+05     |
| 148 | Kurilensoside H                                                  | [M+K] <sup>+</sup>  | C32H54O11  | 653.32977                      | 653.33143                    | 2.5              | 2.7E+06     |
| 149 | Gnididilatin                                                     | [M+H] <sup>+</sup>  | C37H48O10  | 653.33202                      | 653.33320                    | 1.8              | 2.9E+06     |

| #   | Putative Annotation (M) <sup>a</sup>                                        | Ion                 | Formula     | Theor. <i>m/z</i> <sup>b</sup> | Exp. <i>m/z</i> <sup>c</sup> | ppm <sup>d</sup> | Peak_Height |
|-----|-----------------------------------------------------------------------------|---------------------|-------------|--------------------------------|------------------------------|------------------|-------------|
| 150 | PA(13:0/18:2(9Z,12Z))                                                       | [M+Na] <sup>+</sup> | C34H63O8P   | 653.41528                      | 653.41417                    | -1.7             | 1.7E+06     |
| 151 | PG(12:0/16:1(9Z))                                                           | [M+H] <sup>+</sup>  | C34H65O10P  | 665.43881                      | 665.44072                    | 2.9              | 2.6E+06     |
| 152 | 1-(O-alpha-D-galactopyranosyl)-3-keto-(1,27R,29R)-triacontanetriol          | [M+Na] <sup>+</sup> | C36H70O9    | 669.49120                      | 669.49061                    | -0.9             | 1.1E+06     |
| 153 | 1-(O-alpha-D-galactopyranosyl)-(1,3R,27S,29R)-triacontanetetrol             | [M+Na] <sup>+</sup> | C36H72O9    | 671.50685                      | 671.50816                    | 1.9              | 1.5E+06     |
| 154 | SM(d18:0/12:0)                                                              | [M+Na] <sup>+</sup> | C35H73N2O6P | 671.50985                      | 671.50816                    | -2.5             | 1.5E+06     |
| 155 | Pandaroside B                                                               | [M+K] <sup>+</sup>  | C35H54O10   | 673.33486                      | 673.33538                    | 0.8              | 4.0E+06     |
| 156 | PI(22:2(13Z,16Z)/0:0)                                                       | [M+Na] <sup>+</sup> | C31H57O12P  | 675.34798                      | 675.34693                    | -1.6             | 1.2E+06     |
| 157 | PG(12:0/17:2(9Z,12Z))                                                       | [M+H] <sup>+</sup>  | C35H65O10P  | 677.43881                      | 677.43866                    | -0.2             | 4.5E+06     |
| 158 | Purpureacin-1                                                               | [M+K] <sup>+</sup>  | C37H66O8    | 677.43893                      | 677.43866                    | -0.4             | 4.5E+06     |
| 159 | Abrusoside A                                                                | [M+K] <sup>+</sup>  | C36H54O10   | 685.33486                      | 685.33681                    | 2.8              | 1.5E+06     |
| 160 | 1-Palmitoyl-2-(5-hydroxy-8-oxo-6-octenoyl)-sn-glycero-3-phosphatidylcholine | [M+K] <sup>+</sup>  | C32H60NO10P | 688.35864                      | 688.35682                    | -2.6             | 1.4E+06     |
| 161 | methyl 13-sophorosyloxycosanoate                                            | [M+H] <sup>+</sup>  | C35H66O13   | 695.45762                      | 695.45841                    | 1.1              | 1.5E+06     |
| 162 | Sanggenon D                                                                 | [M-H] <sup>-</sup>  | C40H36O12   | 707.21340                      | 707.21154                    | -2.6             | 3.8E+06     |
| 163 | PE(14:1(9Z)/P-18:1(11Z))                                                    | [M+K] <sup>+</sup>  | C37H70NO7P  | 710.45215                      | 710.45107                    | -1.5             | 1.3E+06     |
| 164 | DG(20:3(5Z,8Z,11Z)/22:6(4Z,7Z,10Z,13Z,16Z,19Z)/0:0)                         | [M+Na] <sup>+</sup> | C45H70O5    | 713.51155                      | 713.51179                    | 0.3              | 1.8E+06     |
| 165 | PA(15:1(9Z)/22:2(13Z,16Z))                                                  | [M+H] <sup>+</sup>  | C40H73O8P   | 713.51158                      | 713.51179                    | 0.3              | 1.8E+06     |
| 166 | DG(22:6(4Z,7Z,10Z,13Z,16Z,19Z)/22:6(4Z,7Z,10Z,13Z,16Z,19Z)/0:0)             | [M+H] <sup>+</sup>  | C47H68O5    | 713.51395                      | 713.51402                    | 0.1              | 1.9E+06     |
| 167 | PC(12:0/18:3(6Z,9Z,12Z))                                                    | [M+Na] <sup>+</sup> | C38H70NO8P  | 722.47313                      | 722.47171                    | -2.0             | 1.2E+06     |
| 168 | PA(O-16:0/20:3(8Z,11Z,14Z))                                                 | [M+K] <sup>+</sup>  | C39H73O7P   | 723.47255                      | 723.47460                    | 2.8              | 1.0E+06     |
| 169 | PS(P-16:0/17:2(9Z,12Z))                                                     | [M-H] <sup>-</sup>  | C39H72NO9P  | 728.48719                      | 728.48532                    | -2.6             | 3.5E+05     |
| 170 | Quercetin 3-(3",4"-diacetylramnosyl)-(1->6)-glucoside                       | [M+Cl] <sup>-</sup> | C31H34O18   | 729.14392                      | 729.14496                    | 1.4              | 2.4E+05     |
| 171 | OH-Chlorobactene glucoside ester                                            | [M+H] <sup>+</sup>  | C47H68O6    | 729.50887                      | 729.51004                    | 1.6              | 7.3E+05     |
| 172 | PG(13:0/20:1(11Z))                                                          | [M+H] <sup>+</sup>  | C39H75O10P  | 735.51706                      | 735.51789                    | 1.1              | 5.1E+06     |
| 173 | PC(14:1(9Z)/P-18:1(11Z))                                                    | [M+Na] <sup>+</sup> | C40H76NO7P  | 736.52516                      | 736.52315                    | -2.7             | 2.1E+06     |
| 174 | Delavaine A                                                                 | [M+Na] <sup>+</sup> | C38H54N2O11 | 737.36198                      | 737.36391                    | 2.6              | 2.7E+06     |
| 175 | PI(12:0/12:0)                                                               | [M+K] <sup>+</sup>  | C33H63O13P  | 737.36379                      | 737.36391                    | 0.2              | 2.7E+06     |
| 176 | PC(12:0/18:2(9Z,12Z))                                                       | [M+K] <sup>+</sup>  | C38H72NO8P  | 740.46271                      | 740.46189                    | -1.1             | 1.1E+06     |
| 177 | Spinosyn P                                                                  | [M+K] <sup>+</sup>  | C39H61NO10  | 742.39271                      | 742.39078                    | -2.6             | 1.0E+06     |
| 178 | PA(15:0/22:6(4Z,7Z,10Z,13Z,16Z,19Z))                                        | [M+K] <sup>+</sup>  | C40H67O8P   | 745.42052                      | 745.41828                    | -3.0             | 3.2E+06     |
| 179 | Chikusetsusaponin Ia                                                        | [M+H] <sup>+</sup>  | C41H70O12   | 755.49400                      | 755.49187                    | -2.8             | 7.2E+05     |



| #   | Putative Annotation (M) <sup>a</sup>                                    | Ion                 | Formula     | Theor. <i>m/z</i> <sup>b</sup> | Exp. <i>m/z</i> <sup>c</sup> | ppm <sup>d</sup> | Peak_Height |
|-----|-------------------------------------------------------------------------|---------------------|-------------|--------------------------------|------------------------------|------------------|-------------|
| 180 | PA(O-16:0/22:0)                                                         | [M+K] <sup>+</sup>  | C41H83O7P   | 757.55080                      | 757.54956                    | -1.6             | 1.2E+06     |
| 181 | Avermectin A1a monosaccharide                                           | [M+Na] <sup>+</sup> | C42H62O11   | 765.41843                      | 765.41616                    | -3.0             | 1.8E+06     |
| 182 | Nonactin                                                                | [M+K] <sup>+</sup>  | C40H64O12   | 775.40294                      | 775.40293                    | 0.0              | 1.4E+06     |
| 183 | Mycolactone                                                             | [M+K] <sup>+</sup>  | C44H70O9    | 781.46514                      | 781.46564                    | 0.6              | 1.1E+06     |
| 184 | PA(P-20:0/22:6(4Z,7Z,10Z,13Z,16Z,19Z))                                  | [M+Cl] <sup>-</sup> | C45H77O7P   | 795.51009                      | 795.50948                    | -0.8             | 3.9E+05     |
| 185 | PG(14:0/22:0)                                                           | [M+Na] <sup>+</sup> | C42H83O10P  | 801.56161                      | 801.56260                    | 1.2              | 8.9E+05     |
| 186 | PG(16:1(9Z)/22:2(13Z,16Z))                                              | [M+H] <sup>+</sup>  | C44H81O10P  | 801.56401                      | 801.56260                    | -1.8             | 8.9E+05     |
| 187 | Trihydroxyspirosten-yl O-L-rhamnopyranosyl-(1-2)-beta-D-glucopyranoside | [M+Na] <sup>+</sup> | C40H66O15   | 809.42939                      | 809.43117                    | 2.2              | 1.0E+06     |
| 188 | PI(13:0/18:3(6Z,9Z,12Z))                                                | [M+Na] <sup>+</sup> | C40H71O13P  | 829.42639                      | 829.42742                    | 1.2              | 1.3E+06     |
| 189 | Gymnemic acid I                                                         | [M+K] <sup>+</sup>  | C43H66O14   | 845.40842                      | 845.40879                    | 0.4              | 7.4E+05     |
| 190 | PI(12:0/20:1(11Z))                                                      | [M+K] <sup>+</sup>  | C41H77O13P  | 847.47334                      | 847.47198                    | -1.6             | 7.8E+05     |
| 191 | PS(P-20:0/22:4(7Z,10Z,13Z,16Z))                                         | [M+H] <sup>+</sup>  | C48H86NO9P  | 852.61130                      | 852.61364                    | 2.7              | 1.1E+06     |
| 192 | PI(17:0/22:0)                                                           | [M+H] <sup>+</sup>  | C48H93O13P  | 909.64266                      | 909.64511                    | 2.7              | 1.8E+06     |
| 193 | PS(21:0/22:1(11Z))                                                      | [M+Na] <sup>+</sup> | C49H94NO10P | 910.65076                      | 910.65108                    | 0.4              | 9.7E+05     |
| 194 | PGP(16:0/22:4(7Z,10Z,13Z,16Z))                                          | [M+K] <sup>+</sup>  | C44H80O13P2 | 917.47058                      | 917.47086                    | 0.3              | 5.7E+05     |
| 195 | PS(22:2(13Z,16Z)/22:0)                                                  | [M+Cl] <sup>-</sup> | C50H94NO10P | 934.63094                      | 934.63278                    | 2.0              | 5.3E+05     |
| 196 | PGP(18:3(6Z,9Z,12Z)/22:6(4Z,7Z,10Z,13Z,16Z,19Z))                        | [M+K] <sup>+</sup>  | C46H74O13P2 | 935.42363                      | 935.42349                    | -0.1             | 8.1E+05     |
| 197 | Ophiopogonin C                                                          | [M+K] <sup>+</sup>  | C46H72O17   | 935.44011                      | 935.43736                    | -2.9             | 1.0E+06     |
| 198 | TG(17:2(9Z,12Z)/20:4(5Z,8Z,11Z,14Z)/20:5(5Z,8Z,11Z,14Z,17Z))            | [M+Cl] <sup>-</sup> | C60H94O6    | 945.67444                      | 945.67184                    | -2.8             | 3.7E+05     |

<sup>a</sup>Cer: Ceramide; GalCer: Galactosylceramide; GlcCer: Glucosylceramide; Glc-GP: phosphatidylglucose; LacCer: Lactosylceramide; MG: Monoacylglycerol; DAT: Acyltrehaloses; DG: Diacylglycerol; TG: Triacylglycerol; MGDG: Monoacyldiacylglycerol; PA: Phosphatidic acid; PC: Phosphatidylcholine; PE: Phosphatidylethanolamine; PG: Glycerophospholipids; PI: Phosphatidylinositol; PIP2: phosphatidylinositol bisphosphate; PS: Phosphatidylserine; SM: Sphingomyelin.

<sup>b</sup>Theor. stands for calculated exact mass to charge ratio.

<sup>c</sup>Exp. stands for experimental *m/z* value.

<sup>d</sup>The error expressed in parts per million (ppm).

**Table S3.** ESI FT-ICR MS comprehensive list of metabolites detected in SurE 10K.

| #  | Putative Annotation (M) <sup>a</sup> | Ion     | Formula  | Theor. $m/z$ <sup>b</sup> | Exp. $m/z$ <sup>c</sup> | ppm <sup>d</sup> | Peak Height |
|----|--------------------------------------|---------|----------|---------------------------|-------------------------|------------------|-------------|
| 1  | L-Lactic acid                        | [M-H]-  | C3H6O3   | 89.02442                  | 89.02430                | -1.3             | 2.2E+04     |
| 2  | Acrolein                             | [M+Cl]- | C3H4O    | 90.99562                  | 90.99559                | -0.3             | 1.5E+04     |
| 3  | Vinyl ether                          | [M+Na]+ | C4H6O    | 93.03109                  | 93.03099                | -1.0             | 4.8E+04     |
| 4  | Acrylamide                           | [M+Na]+ | C3H5NO   | 94.02633                  | 94.02658                | 2.6              | 5.3E+04     |
| 5  | 2-Propyn-1-ol                        | [M+K]+  | C3H4O    | 94.98937                  | 94.98962                | 2.6              | 4.1E+04     |
| 6  | 2-Methylpropanamine                  | [M+Na]+ | C4H11N   | 96.07837                  | 96.07818                | -2.0             | 5.0E+04     |
| 7  | Sulfate                              | [M-H]-  | H2SO4    | 96.96010                  | 96.96038                | 2.9              | 2.8E+04     |
| 8  | Trimethylamine                       | [M+K]+  | C3H9N    | 98.03666                  | 98.03654                | -1.2             | 6.5E+04     |
| 9  | 1-Amino-propan-2-ol                  | [M+Na]+ | C3H9NO   | 98.05763                  | 98.05752                | -1.2             | 6.1E+04     |
| 10 | Hydroxyurea                          | [M+Na]+ | CH4N2O2  | 99.01650                  | 99.01654                | 0.4              | 3.5E+04     |
| 11 | Propan-2-ol                          | [M+K]+  | C3H8O    | 99.02067                  | 99.02067                | 0.0              | 3.9E+04     |
| 12 | Propane-1-thiol                      | [M+Cl]- | C3H8S    | 111.00407                 | 111.00393               | -1.3             | 1.7E+04     |
| 13 | Butanal                              | [M+K]+  | C4H8O    | 111.02067                 | 111.02070               | 0.2              | 4.1E+04     |
| 14 | N-Acetylimidazole                    | [M+H]+  | C5H6N2O  | 111.05529                 | 111.05549               | 1.8              | 4.2E+04     |
| 15 | Maleamate                            | [M-H]-  | C4H5NO3  | 114.01967                 | 114.01934               | -2.9             | 1.9E+04     |
| 16 | 3-Mercaptopyruvic acid               | [M-H]-  | C3H4O3S  | 118.98084                 | 118.98119               | 3.0              | 1.9E+04     |
| 17 | D-Erythrose                          | [M+H]+  | C4H8O4   | 121.04954                 | 121.04931               | -1.9             | 3.5E+04     |
| 18 | Thymine                              | [M-H]-  | C5H6N2O2 | 125.03565                 | 125.03545               | -1.6             | 2.2E+04     |
| 19 | 2,3,6-Trihydroxypyridine             | [M-H]-  | C5H5NO3  | 126.01967                 | 126.01980               | 1.1              | 2.0E+04     |
| 20 | 2-Cyanopyridine                      | [M+Na]+ | C6H4N2   | 127.02667                 | 127.02654               | -1.0             | 3.9E+04     |
| 21 | Furfural                             | [M+Cl]- | C5H4O2   | 130.99053                 | 130.99019               | -2.6             | 3.0E+04     |
| 22 | Cinnamaldehyde                       | [M-H]-  | C9H8O    | 131.05024                 | 131.05001               | -1.7             | 2.7E+04     |
| 23 | Cyclohexyl isocyanide                | [M+Na]+ | C7H11N   | 132.07837                 | 132.07804               | -2.5             | 3.8E+04     |
| 24 | L-Malic acid                         | [M-H]-  | C4H6O5   | 133.01425                 | 133.01436               | 0.9              | 2.0E+05     |
| 25 | Thiobenzamide                        | [M-H]-  | C7H7NS   | 136.02264                 | 136.02251               | -1.0             | 1.7E+04     |
| 26 | Threonic acid                        | [M+H]+  | C4H8O5   | 137.04445                 | 137.04477               | 2.3              | 4.4E+04     |
| 27 | Pyruvate oxime                       | [M+Cl]- | C3H5NO3  | 137.99634                 | 137.99660               | 1.9              | 3.3E+04     |
| 28 | 6-Hydroxynicotinate                  | [M-H]-  | C6H5NO3  | 138.01967                 | 138.01928               | -2.8             | 2.6E+04     |
| 29 | L-Proline                            | [M+Na]+ | C5H9NO2  | 138.05255                 | 138.05277               | 1.6              | 4.1E+04     |
| 30 | Tyramine                             | [M+H]+  | C8H11NO  | 138.09134                 | 138.09173               | 2.8              | 7.8E+04     |
| 31 | Cyclohexanol                         | [M+K]+  | C6H12O   | 139.05197                 | 139.05228               | 2.2              | 3.9E+04     |
| 32 | 8-Hydroxypurine                      | [M+H]+  | C5H6N4O  | 139.06144                 | 139.06135               | -0.6             | 4.0E+04     |
| 33 | Diethanolamine                       | [M+Cl]- | C4H11NO2 | 140.04838                 | 140.04803               | -2.5             | 2.4E+04     |
| 34 | Thiocarbohydrazide                   | [M+Cl]- | CH6N4S   | 141.00072                 | 141.00039               | -2.3             | 1.8E+04     |
| 35 | 2-decene-4,6,8-triyn-1-al            | [M-H]-  | C10H6O   | 141.03459                 | 141.03422               | -2.6             | 2.5E+04     |
| 36 | 1-Hexenyl acetate                    | [M-H]-  | C8H14O2  | 141.09210                 | 141.09233               | 1.6              | 2.8E+04     |

|    |                                  |                     |           |           |           |      |         |
|----|----------------------------------|---------------------|-----------|-----------|-----------|------|---------|
| 37 | 5-Nitrofurfural                  | [M+H] <sup>+</sup>  | C5H3NO4   | 142.01348 | 142.01361 | 0.9  | 4.3E+04 |
| 38 | Proline betaine                  | [M-H] <sup>-</sup>  | C7H13NO2  | 142.08735 | 142.08756 | 1.5  | 5.3E+04 |
| 39 | (-)-Hygroline                    | [M-H] <sup>-</sup>  | C8H17NO   | 142.12374 | 142.12339 | -2.4 | 4.5E+04 |
| 40 | Diallyl disulfide                | [M-H] <sup>-</sup>  | C6H10S2   | 145.01512 | 145.01481 | -2.1 | 2.6E+04 |
| 41 | N-Acetylimidazole                | [M+Cl] <sup>-</sup> | C5H6N2O   | 145.01741 | 145.01773 | 2.2  | 3.4E+04 |
| 42 | D-Threitol                       | [M+Na] <sup>+</sup> | C4H10O4   | 145.04713 | 145.04706 | -0.5 | 4.4E+04 |
| 43 | L-Lysine                         | [M-H] <sup>-</sup>  | C6H14N2O2 | 145.09825 | 145.09868 | 3.0  | 2.1E+04 |
| 44 | L-Glutamic acid                  | [M-H] <sup>-</sup>  | C5H9NO4   | 146.04588 | 146.04586 | -0.1 | 1.3E+05 |
| 45 | Maleamate                        | [M+Cl] <sup>-</sup> | C4H5NO3   | 149.99634 | 149.99614 | -1.4 | 1.9E+04 |
| 46 | Histamine                        | [M+K] <sup>+</sup>  | C5H9N3    | 150.04281 | 150.04313 | 2.2  | 5.0E+04 |
| 47 | L-Methionine                     | [M+H] <sup>+</sup>  | C5H11NO2S | 150.05833 | 150.05837 | 0.3  | 5.3E+04 |
| 48 | N-Nitroso-1,3-thiazolidine       | [M+Cl] <sup>-</sup> | C3H6N2OS  | 152.98949 | 152.98941 | -0.5 | 1.3E+04 |
| 49 | (+)-Borneol                      | [M-H] <sup>-</sup>  | C10H18O   | 153.12849 | 153.12861 | 0.8  | 1.6E+04 |
| 50 | Leucine                          | [M+Na] <sup>+</sup> | C6H13NO2  | 154.08385 | 154.08361 | -1.6 | 2.2E+05 |
| 51 | 3-Mercaptopyruvic acid           | [M+Cl] <sup>-</sup> | C3H4O3S   | 154.95752 | 154.95775 | 1.5  | 1.5E+04 |
| 52 | 1,2,3-Trimethylbenzene           | [M+Cl] <sup>-</sup> | C9H12     | 155.06330 | 155.06307 | -1.5 | 1.8E+04 |
| 53 | 5-oxo-7-octenoic acid            | [M-H] <sup>-</sup>  | C8H12O3   | 155.07137 | 155.07146 | 0.6  | 3.0E+04 |
| 54 | 3Z-nonenoic acid                 | [M-H] <sup>-</sup>  | C9H16O2   | 155.10775 | 155.10788 | 0.8  | 1.8E+04 |
| 55 | 3-Mercaptolactate                | [M+Cl] <sup>-</sup> | C3H6O3S   | 156.97317 | 156.97291 | -1.6 | 1.4E+04 |
| 56 | Dihydropteridine                 | [M+Na] <sup>+</sup> | C6H6N4    | 157.04847 | 157.04867 | 1.3  | 7.3E+04 |
| 57 | Oxoadipic acid                   | [M+H] <sup>+</sup>  | C6H8O5    | 161.04445 | 161.04401 | -2.7 | 4.4E+04 |
| 58 | Aminoadipic acid                 | [M+H] <sup>+</sup>  | C6H11NO4  | 162.07608 | 162.07576 | -2.0 | 5.4E+04 |
| 59 | Tetrahydropyridine-2-carboxylate | [M+K] <sup>+</sup>  | C6H9NO2   | 166.02649 | 166.02695 | 2.8  | 6.4E+04 |
| 60 | L-Phenylalanine                  | [M+H] <sup>+</sup>  | C9H11NO2  | 166.08626 | 166.08609 | -1.0 | 9.6E+04 |
| 61 | Phosphonoalanine                 | [M-H] <sup>-</sup>  | C3H8NO5P  | 168.00673 | 168.00698 | 1.5  | 1.4E+04 |
| 62 | L-Aspartate                      | [M+Cl] <sup>-</sup> | C4H7NO4   | 168.00691 | 168.00698 | 0.4  | 1.4E+04 |
| 63 | Agmatine                         | [M+K] <sup>+</sup>  | C5H14N4   | 169.08501 | 169.08531 | 1.8  | 4.8E+04 |
| 64 | Cyclo(Ala-Val)                   | [M+H] <sup>+</sup>  | C8H12N2O2 | 169.09715 | 169.09761 | 2.7  | 5.9E+04 |
| 65 | Acetylarginine                   | [M-H] <sup>-</sup>  | C7H16N4O  | 171.12513 | 171.12489 | -1.4 | 2.4E+04 |
| 66 | (-)-Carvone                      | [M+Na] <sup>+</sup> | C10H14O   | 173.09369 | 173.09347 | -1.2 | 5.8E+04 |
| 67 | 2-Nitrophenol                    | [M+Cl] <sup>-</sup> | C6H5NO3   | 173.99634 | 173.99650 | 0.9  | 1.2E+04 |
| 68 | 2-Quinolinecarboxylic acid       | [M+H] <sup>+</sup>  | C10H7NO2  | 174.05495 | 174.05531 | 2.0  | 4.4E+04 |
| 69 | 1,3-Dimethyluracil               | [M+Cl] <sup>-</sup> | C6H8N2O2  | 175.02798 | 175.02763 | -2.0 | 1.7E+04 |
| 70 | L-Arginine                       | [M+H] <sup>+</sup>  | C6H14N4O2 | 175.11895 | 175.11895 | 0.0  | 3.7E+05 |
| 71 | cis-Carboxymethylenebutenolide   | [M+K] <sup>+</sup>  | C6H4O4    | 178.97412 | 178.97377 | -1.9 | 5.0E+04 |
| 72 | 2-Hydroxypropylphosphonate       | [M+K] <sup>+</sup>  | C3H9O4P   | 178.98700 | 178.98657 | -2.4 | 6.5E+04 |
| 73 | Aldohexose                       | [M-H] <sup>-</sup>  | C6H12O6   | 179.05611 | 179.05568 | -2.4 | 2.4E+05 |
| 74 | Eugenol methyl ether             | [M+H] <sup>+</sup>  | C11H14O2  | 179.10666 | 179.10628 | -2.1 | 5.4E+04 |
| 75 | Carbamoyl phosphate              | [M+K] <sup>+</sup>  | CH4NO5P   | 179.94587 | 179.94633 | 2.6  | 4.8E+04 |

|     |                                      |                     |           |           |           |      |         |
|-----|--------------------------------------|---------------------|-----------|-----------|-----------|------|---------|
| 76  | Caffeic acid                         | [M+H] <sup>+</sup>  | C9H8O4    | 181.04954 | 181.04954 | 0.0  | 1.1E+05 |
| 77  | L-Lathyrine                          | [M-H] <sup>-</sup>  | C7H10N4O2 | 181.07310 | 181.07345 | 1.9  | 7.0E+04 |
| 78  | 5-Hydroxyisourate                    | [M-H] <sup>-</sup>  | C5H4N4O4  | 183.01598 | 183.01562 | -2.0 | 1.4E+04 |
| 79  | 3-Sulfinioalanine                    | [M+Cl] <sup>-</sup> | C3H6NO4S  | 186.97116 | 186.97153 | 2.0  | 1.3E+04 |
| 80  | 2-Amino-4-nitrotoluene               | [M+Cl] <sup>-</sup> | C7H8N2O2  | 187.02798 | 187.02771 | -1.4 | 1.3E+04 |
| 81  | Undecanoic acid                      | [M+H] <sup>+</sup>  | C11H22O2  | 187.16926 | 187.16924 | -0.1 | 5.1E+04 |
| 82  | Triethanolamine                      | [M+K] <sup>+</sup>  | C6H15NO3  | 188.06835 | 188.06836 | 0.0  | 1.9E+05 |
| 83  | Phosphoenolpyruvate                  | [M+Na] <sup>+</sup> | C3H5O6P   | 190.97160 | 190.97147 | -0.7 | 7.6E+04 |
| 84  | Citrate                              | [M-H] <sup>-</sup>  | C6H8O7    | 191.01973 | 191.01985 | 0.6  | 1.8E+04 |
| 85  | 4-Nitroquinoline N-oxide             | [M+H] <sup>+</sup>  | C9H6N2O3  | 191.04512 | 191.04533 | 1.1  | 5.3E+04 |
| 86  | 2-Oxo-7-methylthioheptanoic acid     | [M+H] <sup>+</sup>  | C8H14O3S  | 191.07364 | 191.07390 | 1.4  | 5.6E+04 |
| 87  | 4-Aminohippuric acid                 | [M-H] <sup>-</sup>  | C9H10N2O3 | 193.06187 | 193.06205 | 1.0  | 1.9E+04 |
| 88  | Nonanoic acid                        | [M+Cl] <sup>-</sup> | C9H18O2   | 193.10008 | 193.10024 | 0.8  | 1.6E+04 |
| 89  | L-Histidine                          | [M+K] <sup>+</sup>  | C6H9N3O2  | 194.03264 | 194.03235 | -1.5 | 5.2E+04 |
| 90  | Indoleacetaldehyde                   | [M+Cl] <sup>-</sup> | C10H9NO   | 194.03782 | 194.03819 | 1.9  | 1.3E+04 |
| 91  | Benzenamine sulfate                  | [M+Na] <sup>+</sup> | C6H6NO3S  | 194.99606 | 194.99601 | -0.3 | 6.3E+04 |
| 92  | 1,6-Dimethylnaphthalene              | [M+K] <sup>+</sup>  | C12H12    | 195.05706 | 195.05670 | -1.8 | 6.9E+04 |
| 93  | (S)-Carnitine                        | [M+Cl] <sup>-</sup> | C7H15NO3  | 196.07459 | 196.07489 | 1.5  | 2.3E+04 |
| 94  | N-Acetylornithine                    | [M+Na] <sup>+</sup> | C7H14N2O3 | 197.08966 | 197.08912 | -2.8 | 7.6E+04 |
| 95  | Acetylcysteine                       | [M+Cl] <sup>-</sup> | C5H9NO3S  | 197.99972 | 197.99951 | -1.0 | 1.6E+04 |
| 96  | Hydroxyatrazine                      | [M+H] <sup>+</sup>  | C8H15N5O  | 198.13494 | 198.13469 | -1.2 | 5.8E+04 |
| 97  | 4,5-Dihydroxyphthalate               | [M+H] <sup>+</sup>  | C8H6O6    | 199.02371 | 199.02327 | -2.2 | 1.1E+05 |
| 98  | 1,5-Anhydro-D-glucitol               | [M+Cl] <sup>-</sup> | C6H12O5   | 199.03788 | 199.03760 | -1.4 | 1.4E+04 |
| 99  | 5-Acetylamino-6-amino-3-methyluracil | [M+H] <sup>+</sup>  | C7H10N4O3 | 199.08257 | 199.08244 | -0.6 | 8.7E+04 |
| 100 | L-Methionine (R)-S-oxide             | [M+Cl] <sup>-</sup> | C5H11NO3S | 200.01537 | 200.01554 | 0.9  | 1.4E+04 |
| 101 | Eugenol methyl ether                 | [M+Na] <sup>+</sup> | C11H14O2  | 201.08860 | 201.08857 | -0.2 | 1.0E+05 |
| 102 | 4-Aminophenyl ether                  | [M+H] <sup>+</sup>  | C12H12N2O | 201.10224 | 201.10201 | -1.1 | 6.0E+04 |
| 103 | Diethyl adipate                      | [M-H] <sup>-</sup>  | C10H18O4  | 201.11323 | 201.11346 | 1.1  | 3.3E+04 |
| 104 | 7-Aminomethyl-7-carbaguanine         | [M+Na] <sup>+</sup> | C7H9N5O   | 202.06993 | 202.07022 | 1.4  | 7.0E+04 |
| 105 | (5-Phenyl-1,2,4-triazol-3-yl)urea    | [M-H] <sup>-</sup>  | C9H9N5O   | 202.07343 | 202.07384 | 2.0  | 1.3E+04 |
| 106 | D-Aldose                             | [M+Na] <sup>+</sup> | C6H12O6   | 203.05261 | 203.05260 | 0.0  | 7.1E+05 |
| 107 | L-Phenylalanine                      | [M+K] <sup>+</sup>  | C9H11NO2  | 204.04214 | 204.04256 | 2.1  | 1.8E+05 |
| 108 | Propylthiouracil                     | [M+Cl] <sup>-</sup> | C7H10N2OS | 205.02079 | 205.02018 | -3.0 | 1.7E+04 |
| 109 | Sorbitol                             | [M+Na] <sup>+</sup> | C6H14O6   | 205.06826 | 205.06843 | 0.8  | 2.3E+06 |
| 110 | 4-Octylphenol                        | [M-H] <sup>-</sup>  | C14H22O   | 205.15979 | 205.15946 | -1.6 | 2.8E+04 |
| 111 | 9-oxo-2E-decenoic acid               | [M+Na] <sup>+</sup> | C10H16O3  | 207.09917 | 207.09975 | 2.8  | 7.7E+04 |
| 112 | Dodecylaldehyde                      | [M+Na] <sup>+</sup> | C12H24O   | 207.17194 | 207.17214 | 1.0  | 6.0E+04 |
| 113 | Cysteic acid                         | [M+K] <sup>+</sup>  | C3H7NO5S  | 207.96765 | 207.96735 | -1.5 | 9.9E+04 |
| 114 | (S)-2-O-Sulfolactate                 | [M+K] <sup>+</sup>  | C3H6O6S   | 208.95167 | 208.95149 | -0.9 | 1.0E+05 |

|     |                                           |                     |            |           |           |      |         |
|-----|-------------------------------------------|---------------------|------------|-----------|-----------|------|---------|
| 115 | Propanoylagmatine                         | [M+Na] <sup>+</sup> | C8H18N4O   | 209.13728 | 209.13680 | -2.3 | 1.2E+05 |
| 116 | N4-Phosphoagmatine                        | [M+H] <sup>+</sup>  | C5H15N4O3P | 211.09545 | 211.09579 | 1.6  | 9.1E+04 |
| 117 | 2-tridecene-4,7-diyнал                    | [M+Na] <sup>+</sup> | C13H16O    | 211.10934 | 211.10988 | 2.6  | 9.7E+04 |
| 118 | 4-Hydroxylamino-2,6-dinitrotoluene        | [M+H] <sup>+</sup>  | C7H7N3O5   | 214.04585 | 214.04600 | 0.7  | 7.1E+04 |
| 119 | Bergapten                                 | [M-H] <sup>-</sup>  | C12H8O4    | 215.03498 | 215.03558 | 2.8  | 4.1E+04 |
| 120 | Adrenochrome o-semiquinone                | [M+Cl] <sup>-</sup> | C9H10NO3   | 215.03547 | 215.03558 | 0.5  | 4.1E+04 |
| 121 | L-Lathyrine                               | [M+Cl] <sup>-</sup> | C7H10N4O2  | 217.04978 | 217.04969 | -0.4 | 2.0E+05 |
| 122 | 2,2',3-Trihydroxydiphenylether            | [M-H] <sup>-</sup>  | C12H10O4   | 217.05063 | 217.05062 | -0.1 | 3.5E+05 |
| 123 | 5-O-Methyl-myo-inositol                   | [M+Na] <sup>+</sup> | C7H14O6    | 217.06826 | 217.06800 | -1.2 | 7.1E+04 |
| 124 | 3-(3,4-Dihydroxyphenyl)pyruvate           | [M+Na] <sup>+</sup> | C9H8O5     | 219.02639 | 219.02656 | 0.8  | 1.0E+06 |
| 125 | 2-tridecenal                              | [M+Na] <sup>+</sup> | C13H24O    | 219.17194 | 219.17140 | -2.4 | 7.1E+04 |
| 126 | 3-(3,4-Dihydroxyphenyl)lactate            | [M+Na] <sup>+</sup> | C9H10O5    | 221.04204 | 221.04229 | 1.1  | 2.3E+06 |
| 127 | 6-Acetyl-D-glucose                        | [M-H] <sup>-</sup>  | C8H14O7    | 221.06668 | 221.06686 | 0.8  | 2.7E+04 |
| 128 | 7-Methyl-2-hydroxy-6-oxoocta-2,4-dienoate | [M+K] <sup>+</sup>  | C9H12O4    | 223.03672 | 223.03685 | 0.6  | 1.8E+05 |
| 129 | Diethyl phthalate                         | [M+H] <sup>+</sup>  | C12H14O4   | 223.09649 | 223.09591 | -2.6 | 3.5E+05 |
| 130 | O-Phospho-L-serine                        | [M+K] <sup>+</sup>  | C3H8NO6P   | 223.97208 | 223.97192 | -0.7 | 1.0E+05 |
| 131 | Cytisine                                  | [M+Cl] <sup>-</sup> | C11H14N2O  | 225.08001 | 225.08012 | 0.5  | 2.1E+04 |
| 132 | L-Glutamic acid 5-phosphate               | [M-H] <sup>-</sup>  | C5H10NO7P  | 226.01221 | 226.01236 | 0.7  | 2.2E+04 |
| 133 | Deoxycytidine                             | [M-H] <sup>-</sup>  | C9H13N3O4  | 226.08333 | 226.08268 | -2.9 | 2.5E+04 |
| 134 | L-Tryptophan                              | [M+Na] <sup>+</sup> | C11H12N2O2 | 227.07910 | 227.07963 | 2.3  | 9.4E+04 |
| 135 | Myristic acid                             | [M-H] <sup>-</sup>  | C14H28O2   | 227.20165 | 227.20130 | -1.6 | 1.1E+05 |
| 136 | Prolylhydroxyproline                      | [M+H] <sup>+</sup>  | C10H16N2O4 | 229.11828 | 229.11779 | -2.2 | 1.2E+05 |
| 137 | Isovalerylglutamic acid                   | [M+H] <sup>+</sup>  | C10H17NO5  | 232.11795 | 232.11729 | -2.8 | 1.3E+05 |
| 138 | Gamma-Aminobutyryl-lysine                 | [M+H] <sup>+</sup>  | C10H21N3O3 | 232.16557 | 232.16623 | 2.9  | 1.6E+05 |
| 139 | N-Acetylgalactosaminatе                   | [M-H] <sup>-</sup>  | C8H13NO7   | 234.06193 | 234.06176 | -0.7 | 1.6E+04 |
| 140 | Nitro-L-arginine methyl ester             | [M+H] <sup>+</sup>  | C7H15N5O4  | 234.11968 | 234.11962 | -0.3 | 8.9E+04 |
| 141 | D-Erythrose 4-phosphate                   | [M+Cl] <sup>-</sup> | C4H9O7P    | 234.97799 | 234.97830 | 1.3  | 3.1E+04 |
| 142 | 3,3'-Dimethylbenzidine                    | [M+Na] <sup>+</sup> | C14H16N2   | 235.12057 | 235.12040 | -0.7 | 2.9E+05 |
| 143 | 11E-Tetradecen-1-ol                       | [M+Na] <sup>+</sup> | C14H28O    | 235.20324 | 235.20257 | -2.8 | 8.1E+04 |
| 144 | 4-Sulfobenzoate                           | [M+Cl] <sup>-</sup> | C7H6O5S    | 236.96300 | 236.96256 | -1.8 | 2.2E+04 |
| 145 | N-Formyl-D-kynurenine                     | [M+H] <sup>+</sup>  | C11H12N2O4 | 237.08698 | 237.08705 | 0.3  | 1.2E+05 |
| 146 | 10-hydroxy-undecanoic acid                | [M+Cl] <sup>-</sup> | C11H22O3   | 237.12630 | 237.12605 | -1.0 | 2.2E+04 |
| 147 | Triethylenemelamine                       | [M+Cl] <sup>-</sup> | C9H12N6    | 239.08175 | 239.08202 | 1.1  | 2.6E+04 |
| 148 | Thymidine                                 | [M-H] <sup>-</sup>  | C10H14N2O5 | 241.08300 | 241.08269 | -1.3 | 1.7E+05 |
| 149 | Pentadecanoic acid                        | [M-H] <sup>-</sup>  | C15H30O2   | 241.21730 | 241.21736 | 0.2  | 1.5E+05 |
| 150 | Dimethylallyl diphosphate                 | [M-H] <sup>-</sup>  | C5H12O7P2  | 244.99855 | 244.99785 | -2.9 | 2.7E+04 |
| 151 | 2,6-Dihydroxypseudooxynicotine            | [M+Cl] <sup>-</sup> | C10H14N2O3 | 245.06984 | 245.06948 | -1.5 | 2.9E+04 |
| 152 | p-Methoxystilbene                         | [M+Cl] <sup>-</sup> | C15H14O    | 245.07387 | 245.07331 | -2.3 | 3.1E+04 |
| 153 | Monobutylphthalate                        | [M+Na] <sup>+</sup> | C12H14O4   | 245.07843 | 245.07856 | 0.5  | 6.2E+05 |

|     |                                                        |                     |            |           |           |      |         |
|-----|--------------------------------------------------------|---------------------|------------|-----------|-----------|------|---------|
| 154 | Heptadecadiene-4,6-diyn-3-ol                           | [M+H] <sup>+</sup>  | C17H24O    | 245.18999 | 245.19015 | 0.6  | 1.3E+05 |
| 155 | Cyclic 2,3-bisphospho-D-glycerate                      | [M-H] <sup>-</sup>  | C3H6O9P2   | 246.94143 | 246.94175 | 1.3  | 4.5E+04 |
| 156 | N-Acetyl-D-tryptophan                                  | [M+H] <sup>+</sup>  | C13H14N2O3 | 247.10772 | 247.10807 | 1.4  | 1.4E+05 |
| 157 | 1,4'-Bipiperidine-1'-carboxylic acid                   | [M+Cl] <sup>-</sup> | C11H20N2O2 | 247.12188 | 247.12244 | 2.3  | 3.1E+04 |
| 158 | 3,7,11-Trimethyl-6E,10-dodecadien-1-ol                 | [M+Na] <sup>+</sup> | C15H28O    | 247.20324 | 247.20287 | -1.5 | 9.0E+04 |
| 159 | 1-Nitropyrene                                          | [M+H] <sup>+</sup>  | C16H9NO2   | 248.07060 | 248.07067 | 0.3  | 1.4E+05 |
| 160 | 2-Hydroxy-6-oxo-6-(2-hydroxyphenoxy)-hexa-2,4-dienoate | [M-H] <sup>-</sup>  | C12H10O6   | 249.04046 | 249.04106 | 2.4  | 3.5E+04 |
| 161 | 6Z,9Z,12Z-hexadecatrienoic acid                        | [M-H] <sup>-</sup>  | C16H26O2   | 249.18600 | 249.18549 | -2.1 | 2.4E+04 |
| 162 | L-Serine-phosphoethanolamine                           | [M+Na] <sup>+</sup> | C5H13N2O6P | 251.04034 | 251.04083 | 1.9  | 1.5E+05 |
| 163 | 2,4,6-Trihydroxybenzophenone                           | [M+Na] <sup>+</sup> | C13H10O4   | 253.04713 | 253.04682 | -1.2 | 2.6E+05 |
| 164 | Dihydroxybibenzyl                                      | [M+K] <sup>+</sup>  | C14H14O2   | 253.06254 | 253.06276 | 0.9  | 1.6E+05 |
| 165 | D-Lysopine                                             | [M+Cl] <sup>-</sup> | C9H18N2O4  | 253.09606 | 253.09580 | -1.0 | 4.7E+04 |
| 166 | Pantothenic acid                                       | [M+Cl] <sup>-</sup> | C9H17NO5   | 254.08007 | 254.07986 | -0.8 | 3.0E+04 |
| 167 | N-Acetyl-b-glucosaminylamine                           | [M+Cl] <sup>-</sup> | C8H16N2O5  | 255.07532 | 255.07564 | 1.2  | 5.4E+04 |
| 168 | Palmitic acid                                          | [M-H] <sup>-</sup>  | C16H32O2   | 255.23295 | 255.23238 | -2.2 | 3.3E+05 |
| 169 | Hydroxypropionylcarnitine                              | [M+Na] <sup>+</sup> | C10H19NO5  | 256.11554 | 256.11548 | -0.2 | 5.5E+05 |
| 170 | 2'-Hydroxyisoflavone                                   | [M+Na] <sup>+</sup> | C15H10O3   | 261.05221 | 261.05238 | 0.6  | 5.6E+05 |
| 171 | 3,4-Diphenyltetrahydrofuran                            | [M+K] <sup>+</sup>  | C16H16O    | 263.08327 | 263.08281 | -1.8 | 1.3E+05 |
| 172 | 2Z-Dodecenedioic acid                                  | [M+Cl] <sup>-</sup> | C12H20O4   | 263.10556 | 263.10518 | -1.4 | 3.8E+04 |
| 173 | N2-Succinyl-L-ornithine                                | [M+Cl] <sup>-</sup> | C9H16N2O5  | 267.07532 | 267.07556 | 0.9  | 1.5E+05 |
| 174 | Tributyl phosphate                                     | [M+H] <sup>+</sup>  | C12H27O4P  | 267.17197 | 267.17181 | -0.6 | 2.0E+05 |
| 175 | Dihydroresveratrol                                     | [M+K] <sup>+</sup>  | C14H14O3   | 269.05745 | 269.05712 | -1.2 | 1.4E+05 |
| 176 | Doxylamine                                             | [M-H] <sup>-</sup>  | C17H22N2O  | 269.16594 | 269.16566 | -1.0 | 1.1E+05 |
| 177 | Hydroxypropionylcarnitine                              | [M+K] <sup>+</sup>  | C10H19NO5  | 272.08948 | 272.08978 | 1.1  | 3.3E+05 |
| 178 | N2-Succinyl-L-arginine                                 | [M-H] <sup>-</sup>  | C10H18N4O5 | 273.12044 | 273.11983 | -2.2 | 4.2E+04 |
| 179 | 3,6,9,12,15-octadecapentaenoic acid                    | [M+H] <sup>+</sup>  | C18H26O2   | 275.20056 | 275.19976 | -2.9 | 2.3E+05 |
| 180 | 3-Oxosteroid                                           | [M+H] <sup>+</sup>  | C19H30O    | 275.23694 | 275.23660 | -1.2 | 2.3E+05 |
| 181 | Hydroxyhexanoylcarnitine                               | [M+H] <sup>+</sup>  | C13H25NO5  | 276.18055 | 276.18121 | 2.4  | 5.6E+05 |
| 182 | Glu-Glu                                                | [M+H] <sup>+</sup>  | C10H16N2O7 | 277.10303 | 277.10308 | 0.2  | 3.3E+05 |
| 183 | Palmitoleic acid                                       | [M+Na] <sup>+</sup> | C16H30O2   | 277.21380 | 277.21330 | -1.8 | 3.2E+05 |
| 184 | 2'-Hydroxy-4'-methoxydihydrochalcone                   | [M+Na] <sup>+</sup> | C16H16O3   | 279.09917 | 279.09864 | -1.9 | 4.1E+05 |
| 185 | 1,11-Undecanedicarboxylic acid                         | [M+Cl] <sup>-</sup> | C13H24O4   | 279.13686 | 279.13616 | -2.5 | 5.5E+04 |
| 186 | Dibutyl phthalate                                      | [M+H] <sup>+</sup>  | C16H22O4   | 279.15909 | 279.15916 | 0.3  | 4.0E+06 |
| 187 | 5,8,11-heptadecatriynoic acid                          | [M+Na] <sup>+</sup> | C17H22O2   | 281.15120 | 281.15138 | 0.6  | 1.7E+05 |
| 188 | all-trans-Dehydroretinal                               | [M+H] <sup>+</sup>  | C20H26O    | 283.20564 | 283.20546 | -0.6 | 7.4E+05 |
| 189 | 12S-hydroxy-16-heptadecynoic acid                      | [M+H] <sup>+</sup>  | C17H30O3   | 283.22677 | 283.22677 | 0.0  | 4.3E+05 |
| 190 | Retinol                                                | [M+H] <sup>+</sup>  | C20H30O    | 287.23694 | 287.23759 | 2.3  | 4.5E+06 |
| 191 | L-Hyoscyamine                                          | [M-H] <sup>-</sup>  | C17H23NO3  | 288.16052 | 288.16105 | 1.8  | 4.3E+04 |
| 192 | 2,7-Anhydro-alpha-N-acetylneuraminic acid              | [M-H] <sup>-</sup>  | C11H17NO8  | 290.08814 | 290.08858 | 1.5  | 1.5E+05 |

|     |                                                                   |                     |             |           |           |      |         |
|-----|-------------------------------------------------------------------|---------------------|-------------|-----------|-----------|------|---------|
| 193 | Androsterone                                                      | [M+H] <sup>+</sup>  | C19H30O2    | 291.23186 | 291.23245 | 2.0  | 9.0E+05 |
| 194 | 17-Methyl-18-norandrosta-4,13(17)-dien-3-one                      | [M+Na] <sup>+</sup> | C19H26O     | 293.18759 | 293.18760 | 0.0  | 2.4E+05 |
| 195 | 16alpha-Hydroxysteroid                                            | [M+H] <sup>+</sup>  | C19H32O2    | 293.24751 | 293.24759 | 0.3  | 8.5E+05 |
| 196 | Tridecanoylglycine                                                | [M+Na] <sup>+</sup> | C15H29NO3   | 294.20396 | 294.20314 | -2.8 | 1.7E+05 |
| 197 | Aspartame                                                         | [M+H] <sup>+</sup>  | C14H18N2O5  | 295.12885 | 295.12949 | 2.2  | 2.5E+05 |
| 198 | N(6)-(Octanoyl)lysine                                             | [M+Na] <sup>+</sup> | C14H28N2O3  | 295.19921 | 295.19896 | -0.9 | 2.2E+05 |
| 199 | Aminoimidazole ribotide                                           | [M+H] <sup>+</sup>  | C8H14N3O7P  | 296.06421 | 296.06375 | -1.6 | 2.2E+05 |
| 200 | 3,6,9,12,15-octadecapentaenoic acid                               | [M+Na] <sup>+</sup> | C18H26O2    | 297.18250 | 297.18313 | 2.1  | 5.0E+05 |
| 201 | 8-Hydroxylinoleic acid                                            | [M+H] <sup>+</sup>  | C18H32O3    | 297.24242 | 297.24156 | -2.9 | 1.8E+06 |
| 202 | 7-Mercaptoheptanoylthreonine                                      | [M+Cl] <sup>-</sup> | C11H21NO4S  | 298.08853 | 298.08767 | -2.9 | 8.3E+04 |
| 203 | Hydroxyhexanoycarnitine                                           | [M+Na] <sup>+</sup> | C13H25NO5   | 298.16249 | 298.16282 | 1.1  | 2.6E+06 |
| 204 | Pentadecanoylglycine                                              | [M-H] <sup>-</sup>  | C17H33NO3   | 298.23877 | 298.23954 | 2.6  | 4.1E+04 |
| 205 | Benzoyl glucuronide                                               | [M+H] <sup>+</sup>  | C13H14O8    | 299.07614 | 299.07672 | 1.9  | 3.2E+05 |
| 206 | 3,11-dihydroxy myristoic acid                                     | [M+K] <sup>+</sup>  | C14H28O4    | 299.16192 | 299.16224 | 1.1  | 7.8E+05 |
| 207 | 4-Oxoretinal                                                      | [M+H] <sup>+</sup>  | C20H26O2    | 299.20056 | 299.20135 | 2.7  | 1.0E+06 |
| 208 | Trihexyphenidyl                                                   | [M-H] <sup>-</sup>  | C20H31NO    | 300.23329 | 300.23405 | 2.5  | 5.4E+04 |
| 209 | Dibutyl phthalate                                                 | [M+Na] <sup>+</sup> | C16H22O4    | 301.14103 | 301.14128 | 0.8  | 5.4E+06 |
| 210 | 3-Deoxy-D-glycero-D-galacto-2-nonulosonic acid                    | [M+Cl] <sup>-</sup> | C9H16O9     | 303.04883 | 303.04966 | 2.7  | 4.5E+04 |
| 211 | Inosine                                                           | [M+Cl] <sup>-</sup> | C10H12N4O5  | 303.05017 | 303.04966 | -1.7 | 4.5E+04 |
| 212 | Evoxanthidine                                                     | [M+Cl] <sup>-</sup> | C15H11NO4   | 304.03821 | 304.03901 | 2.6  | 3.9E+04 |
| 213 | 4-(3-Methylbut-2-enyl)-L-tryptophan                               | [M+K] <sup>+</sup>  | C16H20N2O2  | 311.11564 | 311.11483 | -2.6 | 3.5E+05 |
| 214 | Methyl 6-(4-isopropyl-4-methyl-5-oxo-2-imidazolin-2-yl)-m-toluate | [M+Na] <sup>+</sup> | C16H20N2O3  | 311.13661 | 311.13615 | -1.5 | 4.8E+05 |
| 215 | 16-Dehydroprogesterone                                            | [M+H] <sup>+</sup>  | C21H28O2    | 313.21621 | 313.21538 | -2.6 | 3.1E+06 |
| 216 | 16,17-Didehydropregnenolone                                       | [M+H] <sup>+</sup>  | C21H30O2    | 315.23186 | 315.23163 | -0.7 | 1.1E+06 |
| 217 | 2-Ethylidene-1,5-dimethyl-3,3-diphenylpyrrolidine                 | [M+K] <sup>+</sup>  | C20H23N     | 316.14621 | 316.14707 | 2.7  | 2.8E+05 |
| 218 | Oleic acid                                                        | [M+Cl] <sup>-</sup> | C18H33O2    | 316.21746 | 316.21711 | -1.1 | 3.9E+04 |
| 219 | 2-Methylaminoadenosine                                            | [M+Na] <sup>+</sup> | C11H16N6O4  | 319.11252 | 319.11213 | -1.2 | 3.9E+05 |
| 220 | Leukotriene A4                                                    | [M+H] <sup>+</sup>  | C20H30O3    | 319.22677 | 319.22655 | -0.7 | 1.4E+06 |
| 221 | Deoxy-5-methylcytidylate                                          | [M-H] <sup>-</sup>  | C10H16N3O7P | 320.06531 | 320.06580 | 1.5  | 4.2E+04 |
| 222 | N4-Acetylcytidine                                                 | [M+Cl] <sup>-</sup> | C11H15N3O6  | 320.06549 | 320.06580 | 1.0  | 4.2E+04 |
| 223 | 3-Epihydroxy-2'-deoxymugineic acid                                | [M+H] <sup>+</sup>  | C12H20N2O8  | 321.12924 | 321.12884 | -1.3 | 5.5E+05 |
| 224 | 11-cis-Dehydroretinal                                             | [M+K] <sup>+</sup>  | C20H26O     | 321.16152 | 321.16202 | 1.5  | 2.5E+05 |
| 225 | (8)-Gingerol                                                      | [M-H] <sup>-</sup>  | C19H30O4    | 321.20713 | 321.20770 | 1.8  | 3.3E+05 |
| 226 | Linolenoyl ethanolamide                                           | [M+H] <sup>+</sup>  | C20H35NO2   | 322.27406 | 322.27501 | 3.0  | 5.1E+06 |
| 227 | Retinal                                                           | [M+K] <sup>+</sup>  | C20H28O     | 323.17717 | 323.17661 | -1.7 | 7.2E+05 |
| 228 | 4-(3,5-Diphenylcyclohexyl)phenol                                  | [M-H] <sup>-</sup>  | C24H24O     | 327.17544 | 327.17593 | 1.5  | 3.3E+05 |
| 229 | Methylpregna-4,9(11)-diene-3,20-dione                             | [M+H] <sup>+</sup>  | C22H30O2    | 327.23186 | 327.23174 | -0.4 | 1.9E+07 |
| 230 | 12-Keto-leukotriene B4                                            | [M-H] <sup>-</sup>  | C20H30O4    | 333.20713 | 333.20640 | -2.2 | 7.7E+04 |
| 231 | 10-keto stearic acid                                              | [M+Cl] <sup>-</sup> | C18H34O3    | 333.22020 | 333.21964 | -1.7 | 9.5E+04 |

|     |                                                 |         |             |           |           |      |         |
|-----|-------------------------------------------------|---------|-------------|-----------|-----------|------|---------|
| 232 | 17-Ethynyl-5alpha-androstan-17beta-ol           | [M+Cl]- | C21H32O     | 335.21472 | 335.21563 | 2.7  | 8.8E+04 |
| 233 | 1-Guanidino-1-deoxy-scyllo-inositol 4-phosphate | [M+Cl]- | C7H16N3O8P  | 336.03690 | 336.03678 | -0.4 | 1.4E+05 |
| 234 | (Ac)2-L-Lys-D-Ala                               | [M+Cl]- | C13H23N3O5  | 336.13317 | 336.13299 | -0.5 | 5.1E+04 |
| 235 | 17-Ethynyl-10-hydroxy-19-nortestosterone        | [M+Na]+ | C20H26O3    | 337.17742 | 337.17711 | -0.9 | 1.0E+06 |
| 236 | Prostaglandin B1                                | [M+H]+  | C20H32O4    | 337.23734 | 337.23708 | -0.8 | 1.2E+06 |
| 237 | 11R-HEPE                                        | [M+Na]+ | C20H29O3    | 340.20089 | 340.20155 | 1.9  | 4.3E+05 |
| 238 | 17beta-Nitro-5alpha-androstane                  | [M+Cl]- | C19H31NO2   | 340.20488 | 340.20529 | 1.2  | 4.3E+05 |
| 239 | 3-Hydroxyquinine                                | [M+H]+  | C20H24N2O3  | 341.18597 | 341.18611 | 0.4  | 5.3E+06 |
| 240 | 10-HETE                                         | [M+Na]+ | C20H31O3    | 342.21654 | 342.21667 | 0.4  | 1.1E+06 |
| 241 | Arachidonic acid                                | [M+K]+  | C20H32O2    | 343.20339 | 343.20424 | 2.5  | 2.5E+07 |
| 242 | Glutathione                                     | [M+K]+  | C10H17N3O6S | 346.04697 | 346.04732 | 1.0  | 2.2E+05 |
| 243 | Affinisine                                      | [M+K]+  | C20H24N2O   | 347.15202 | 347.15116 | -2.5 | 3.0E+05 |
| 244 | 3a,21-Dihydroxy-5b-pregnane-11,20-dione         | [M-H]-  | C21H32O4    | 347.22278 | 347.22196 | -2.4 | 5.9E+04 |
| 245 | (-)-Chimonanthine                               | [M+H]+  | C22H26N4    | 347.22302 | 347.22374 | 2.1  | 5.1E+05 |
| 246 | C25:1 Monocyclic highly branched isoprenoid     | [M-H]-  | C25H48      | 347.36833 | 347.36785 | -1.4 | 9.0E+04 |
| 247 | Arotinoid acid                                  | [M+H]+  | C24H28O2    | 349.21621 | 349.21579 | -1.2 | 2.1E+05 |
| 248 | 19-hydroxy-nonadecanoic acid                    | [M+Cl]- | C19H38O3    | 349.25150 | 349.25101 | -1.4 | 5.2E+04 |
| 249 | N-Glycolyl-D-mannosamine 6-phosphate            | [M+Cl]- | C8H16NO10P  | 352.02058 | 352.02136 | 2.2  | 1.1E+05 |
| 250 | Gibberellin A12 aldehyde                        | [M+K]+  | C20H28O3    | 355.16700 | 355.16653 | -1.3 | 1.5E+06 |
| 251 | (+)-Trihydroxy-decipadiene                      | [M+Cl]- | C20H32O3    | 355.20455 | 355.20397 | -1.6 | 3.7E+05 |
| 252 | cyclo-Dopa 5-O-glucoside                        | [M-H]-  | C15H19NO9   | 356.09870 | 356.09804 | -1.9 | 4.5E+04 |
| 253 | Leukotriene A4                                  | [M+K]+  | C20H30O3    | 357.18265 | 357.18273 | 0.2  | 4.8E+06 |
| 254 | Streptobiosamine                                | [M+Na]+ | C13H23NO9   | 360.12650 | 360.12640 | -0.3 | 3.3E+05 |
| 255 | Benzyl viologen                                 | [M+Na]+ | C24H22N2    | 361.16752 | 361.16769 | 0.5  | 5.3E+05 |
| 256 | (Hydroxymethyl)-5alpha-androstane-diol          | [M+K]+  | C20H34O3    | 361.21395 | 361.21490 | 2.6  | 1.6E+06 |
| 257 | Hydroxy-methyl-androstan-3-one propionate       | [M+H]+  | C23H36O3    | 361.27372 | 361.27358 | -0.4 | 4.4E+05 |
| 258 | Decylubiquinol                                  | [M+K]+  | C19H32O4    | 363.19322 | 363.19420 | 2.7  | 2.3E+05 |
| 259 | Docosahexaenoic acid                            | [M+Cl]- | C22H32O2    | 363.20963 | 363.21008 | 1.2  | 5.8E+04 |
| 260 | Sucrose                                         | [M+Na]+ | C12H22O11   | 365.10543 | 365.10646 | 2.8  | 1.0E+06 |
| 261 | 2-hexadecanoyl-glycerol                         | [M+Cl]- | C19H38O4    | 365.24641 | 365.24571 | -1.9 | 1.3E+05 |
| 262 | Methyl-eicosanoic acid                          | [M+K]+  | C21H42O2    | 365.28164 | 365.28079 | -2.3 | 1.5E+06 |
| 263 | Tetramethoxychalcone                            | [M+K]+  | C19H20O5    | 367.09423 | 367.09419 | -0.1 | 2.2E+05 |
| 264 | Dicyclohexyl phthalate                          | [M+K]+  | C20H26O4    | 369.14627 | 369.14545 | -2.2 | 3.0E+05 |
| 265 | Riboflavin reduced                              | [M+Na]+ | C15H16N4O6  | 371.09620 | 371.09564 | -1.5 | 2.9E+05 |
| 266 | Nicotine glucuronide                            | [M+Cl]- | C16H22N2O6  | 373.11719 | 373.11661 | -1.5 | 5.4E+04 |
| 267 | Erucic acid                                     | [M+Cl]- | C22H42O2    | 373.28788 | 373.28715 | -2.0 | 5.8E+04 |
| 268 | Spinochalcone B                                 | [M+H]+  | C25H26O3    | 375.19547 | 375.19453 | -2.5 | 1.2E+06 |
| 269 | alpha-Ribazole 5'-phosphate                     | [M+Na]+ | C14H19N2O7P | 381.08221 | 381.08116 | -2.8 | 6.3E+05 |
| 270 | Succinyladenosine                               | [M-H]-  | C14H17N5O8  | 382.10044 | 382.09931 | -2.9 | 1.6E+05 |



|     |                                                                                        |         |               |           |           |      |         |
|-----|----------------------------------------------------------------------------------------|---------|---------------|-----------|-----------|------|---------|
| 271 | 13,14-Dihydro-15-oxo-lipoxin A4                                                        | [M+Cl]- | C20H31O5      | 386.18655 | 386.18682 | 0.7  | 5.1E+04 |
| 272 | Leukotriene B4 dimethylamide                                                           | [M+Na]+ | C22H37NO3     | 386.26656 | 386.26548 | -2.8 | 2.7E+05 |
| 273 | N-arachidonoyl GABA                                                                    | [M-H]-  | C24H39NO3     | 388.28572 | 388.28650 | 2.0  | 4.2E+04 |
| 274 | Paratocarpin A                                                                         | [M+H]+  | C25H24O4      | 389.17474 | 389.17390 | -2.1 | 5.5E+05 |
| 275 | 5-Methoxy-7,8-diprenylflavone                                                          | [M+H]+  | C26H28O3      | 389.21112 | 389.21202 | 2.3  | 3.2E+05 |
| 276 | 6-Butyryl-5-hydroxy-4-phenylseselin                                                    | [M+H]+  | C24H22O5      | 391.15400 | 391.15448 | 1.2  | 3.0E+05 |
| 277 | Licoflavone B                                                                          | [M+H]+  | C25H26O4      | 391.19039 | 391.18951 | -2.2 | 4.7E+05 |
| 278 | 3-Oxochola-1,4,6-trien-24-oic Acid                                                     | [M+Na]+ | C24H32O3      | 391.22437 | 391.22551 | 2.9  | 3.2E+05 |
| 279 | 2,2-Dimethyl-3-(4-methoxyphenyl)-4-ethyl-8-(1-pyrrolidinylmethyl)-2H-1-benzopyran-7-ol | [M-H]-  | C25H31NO3     | 392.22312 | 392.22209 | -2.6 | 5.6E+04 |
| 280 | N-stearoyl serine                                                                      | [M+Na]+ | C21H41NO4     | 394.29278 | 394.29349 | 1.8  | 3.4E+05 |
| 281 | gibberellin A28                                                                        | [M+H]+  | C20H26O8      | 395.17004 | 395.17114 | 2.8  | 5.0E+05 |
| 282 | Tris(butoxyethyl)phosphate                                                             | [M-H]-  | C18H39O7P     | 397.23606 | 397.23503 | -2.6 | 2.1E+06 |
| 283 | 19-norcholestanol                                                                      | [M+Na]+ | C26H46O       | 397.34409 | 397.34412 | 0.1  | 2.3E+05 |
| 284 | N-Benzoyl-D-arginine-4-nitroanilide                                                    | [M+H]+  | C19H22N6O4    | 399.17753 | 399.17716 | -0.9 | 2.6E+05 |
| 285 | 1-(1,2,3,4,5-pentahydroxypent-1-yl)-1,2,3,4-tetrahydro-beta-carboline-3-carboxylate    | [M+Cl]- | C17H21N2O7    | 400.10428 | 400.10452 | 0.6  | 4.8E+04 |
| 286 | Estradiol-17-phenylpropionate                                                          | [M-H]-  | C27H32O3      | 403.22787 | 403.22794 | 0.2  | 9.1E+04 |
| 287 | (-)-epicatechin sulfate                                                                | [M+Cl]- | C15H13O9S     | 403.99743 | 403.99822 | 2.0  | 1.4E+05 |
| 288 | PA(14:0/0:0)                                                                           | [M+Na]+ | C17H35O7P     | 405.20126 | 405.20240 | 2.8  | 3.2E+05 |
| 289 | Epicatechin 3-O-p-hydroxybenzoate                                                      | [M-H]-  | C22H18O8      | 409.09289 | 409.09323 | 0.8  | 7.2E+04 |
| 290 | Sterol 3-beta-D-glucoside                                                              | [M-H]-  | C23H38O6      | 409.25956 | 409.25967 | 0.3  | 9.3E+04 |
| 291 | 19-norcholestenone                                                                     | [M+K]+  | C26H42O       | 409.28673 | 409.28556 | -2.8 | 4.7E+05 |
| 292 | Myxalamid A                                                                            | [M+H]+  | C26H41NO3     | 416.31592 | 416.31501 | -2.2 | 4.2E+05 |
| 293 | Dihydroxy-pregnan-one diacetate                                                        | [M+H]+  | C25H38O5      | 419.27920 | 419.28045 | 3.0  | 2.0E+05 |
| 294 | Vitamin D2                                                                             | [M+Na]+ | C28H44O       | 419.32844 | 419.32947 | 2.5  | 2.0E+05 |
| 295 | Propylestra-triene-diol diacetate                                                      | [M+Na]+ | C25H34O4      | 421.23493 | 421.23560 | 1.6  | 5.2E+05 |
| 296 | Cholesterol                                                                            | [M+Cl]- | C27H46O       | 421.32427 | 421.32510 | 2.0  | 6.5E+04 |
| 297 | 2'-Hydroxy-3,5,7,4',5'-pentamethoxyflavone                                             | [M+Cl]- | C20H20O8      | 423.08522 | 423.08574 | 1.2  | 4.8E+04 |
| 298 | 1-Octen-3-ol-3-o-beta-D-xylopyranosyl(1->6)-beta-D-glucopyranoside                     | [M+H]+  | C19H34O10     | 423.22247 | 423.22251 | 0.1  | 3.6E+05 |
| 299 | Cycloprotobuxine C                                                                     | [M+Na]+ | C27H48N2      | 423.37097 | 423.37005 | -2.2 | 6.1E+05 |
| 300 | PGE2-dihydroxypropanylamine                                                            | [M-H]-  | C23H39NO6     | 424.27046 | 424.27036 | -0.2 | 7.9E+04 |
| 301 | Inosine 2'-phosphate                                                                   | [M-H]-  | C10H14N4O11P2 | 427.00615 | 427.00735 | 2.8  | 6.1E+04 |
| 302 | Dihydroxy-norvitamin D3                                                                | [M+Na]+ | C26H44O3      | 427.31827 | 427.31919 | 2.2  | 2.8E+05 |
| 303 | Anandamide 0-phosphate                                                                 | [M+H]+  | C22H38NO5P    | 428.25604 | 428.25637 | 0.8  | 1.8E+05 |
| 304 | trans-Zeatin riboside monophosphate                                                    | [M-H]-  | C15H22N5O8P   | 430.11332 | 430.11257 | -1.8 | 9.2E+04 |
| 305 | Veratramine                                                                            | [M+Na]+ | C27H39NO2     | 432.28730 | 432.28751 | 0.5  | 8.3E+05 |
| 306 | 22-methyl-5Z,9Z-octacosadienoic acid                                                   | [M-H]-  | C29H54O2      | 433.40510 | 433.40397 | -2.6 | 5.5E+04 |
| 307 | MG(0:0/22:1(13Z)/0:0)                                                                  | [M+Na]+ | C25H48O4      | 435.34448 | 435.34565 | 2.7  | 2.8E+05 |

|     |                                                                         |                     |               |           |           |      |         |
|-----|-------------------------------------------------------------------------|---------------------|---------------|-----------|-----------|------|---------|
| 308 | Deacetylindoline                                                        | [M+Na] <sup>+</sup> | C23H30N2O5    | 437.20469 | 437.20571 | 2.3  | 3.2E+05 |
| 309 | Cyclopropyl-21-nor-9,10-seco-cholestatetraene-1,3,25-triol              | [M-H] <sup>-</sup>  | C29H44O3      | 439.32177 | 439.32177 | 0.0  | 7.7E+04 |
| 310 | N-(2-phenoxy-ethyl) arachidonoyl amine                                  | [M+Na] <sup>+</sup> | C28H41NO2     | 446.30295 | 446.30288 | -0.2 | 4.4E+05 |
| 311 | alpha-Phocaecholic acid                                                 | [M+Na] <sup>+</sup> | C24H40O6      | 447.27171 | 447.27282 | 2.5  | 2.9E+05 |
| 312 | (S)-3-hydroxyhexacosanoic acid                                          | [M+Cl] <sup>-</sup> | C26H52O3      | 447.36105 | 447.36187 | 1.8  | 1.1E+05 |
| 313 | C30:5 Monocyclic highly branched isoprenoid B                           | [M+K] <sup>+</sup>  | C30H52        | 451.37006 | 451.37097 | 2.0  | 3.1E+05 |
| 314 | Solanocapsine                                                           | [M+Na] <sup>+</sup> | C27H46N2O2    | 453.34515 | 453.34440 | -1.7 | 4.9E+05 |
| 315 | 1alpha,25-dihydroxy-3-deoxy-3-thiavitamin D3 3-oxide                    | [M+Na] <sup>+</sup> | C26H42O3S     | 457.27469 | 457.27427 | -0.9 | 5.6E+05 |
| 316 | 2alpha-(3-Hydroxypropyl)-1alpha,25-dihydroxy-19-norvitamin D3           | [M-H] <sup>-</sup>  | C29H50O4      | 461.36363 | 461.36408 | 1.0  | 7.8E+04 |
| 317 | Z-Arg-Arg                                                               | [M+H] <sup>+</sup>  | C20H32N8O5    | 465.25684 | 465.25801 | 2.5  | 8.7E+05 |
| 318 | Sphingosine-1-phosphocholine                                            | [M+H] <sup>+</sup>  | C23H49N2O5P   | 465.34519 | 465.34518 | 0.0  | 5.5E+05 |
| 319 | Obliquine                                                               | [M+Na] <sup>+</sup> | C26H28N2O5    | 471.18904 | 471.18770 | -2.8 | 2.7E+05 |
| 320 | 11-trans-LTE4                                                           | [M+Cl] <sup>-</sup> | C23H37NO5S    | 474.20865 | 474.20868 | 0.1  | 9.0E+04 |
| 321 | Docosa-4,7,10,13,16-pentaenoyl carnitine                                | [M+H] <sup>+</sup>  | C29H47NO4     | 474.35779 | 474.35646 | -2.8 | 3.7E+05 |
| 322 | Palmityl oleate                                                         | [M-H] <sup>-</sup>  | C32H62O2      | 477.46770 | 477.46711 | -1.2 | 6.9E+04 |
| 323 | CDP-glycerol                                                            | [M+H] <sup>+</sup>  | C12H21N3O13P2 | 478.06224 | 478.06114 | -2.3 | 2.5E+05 |
| 324 | Ecalcidene                                                              | [M+Na] <sup>+</sup> | C29H45NO3     | 478.32917 | 478.33048 | 2.7  | 4.4E+05 |
| 325 | 3-Sulfodeoxycholic acid                                                 | [M+Na] <sup>+</sup> | C23H38O7S     | 481.22305 | 481.22251 | -1.1 | 5.9E+05 |
| 326 | 13'-hydroxy-alpha-tocopherol                                            | [M+Cl] <sup>-</sup> | C29H50O3      | 481.34540 | 481.34459 | -1.7 | 1.0E+05 |
| 327 | CTP                                                                     | [M-H] <sup>-</sup>  | C9H16N3O14P3  | 481.97724 | 481.97833 | 2.3  | 6.0E+04 |
| 328 | 4-Deoxy-beta-D-gluc-4-enuronosyl-(1,3)-N-acetyl-D-galactosamine-sulfate | [M+Na] <sup>+</sup> | C14H21NO14S   | 482.05750 | 482.05880 | 2.7  | 4.2E+05 |
| 329 | sn-3-O-(Geranylgeranyl)glycerol 1-phosphate                             | [M+K] <sup>+</sup>  | C23H41O6P     | 483.22724 | 483.22670 | -1.1 | 9.0E+05 |
| 330 | Galactosylsphingosine                                                   | [M+Na] <sup>+</sup> | C24H47NO7     | 484.32447 | 484.32337 | -2.3 | 3.1E+05 |
| 331 | 1-(1Z-eicosenyl)-glycero-3-phosphate                                    | [M+Cl] <sup>-</sup> | C23H47O6P     | 485.28043 | 485.28036 | -0.1 | 5.5E+05 |
| 332 | 7-Dehydrocholesterol benzoate                                           | [M-H] <sup>-</sup>  | C34H48O2      | 487.35815 | 487.35670 | -3.0 | 1.3E+05 |
| 333 | Diethyl-1alpha,25-dihydroxy-20,21-methano-23-oxavitamin D3              | [M+H] <sup>+</sup>  | C31H50O4      | 487.37819 | 487.37901 | 1.7  | 3.6E+05 |
| 334 | 1-(5'-Phosphoribosyl)-5-amino-4-(N-succinocarboxamide)-imidazole        | [M+Cl] <sup>-</sup> | C13H19N4O12P  | 489.04311 | 489.04256 | -1.1 | 6.1E+04 |
| 335 | 1alpha-hydroxy-24-(dimethoxyphosphoryl)-25,26,27-trinorvitamin D3       | [M+Na] <sup>+</sup> | C26H43O5P     | 489.27403 | 489.27466 | 1.3  | 8.8E+05 |
| 336 | Vitamin K1 epoxide                                                      | [M+Na] <sup>+</sup> | C31H46O3      | 489.33392 | 489.33323 | -1.4 | 1.8E+06 |
| 337 | 3-Oxoglycyrhretinate                                                    | [M+Na] <sup>+</sup> | C30H44O4      | 491.31318 | 491.31203 | -2.3 | 7.7E+05 |
| 338 | PA(20:3(8Z,11Z,14Z)/0:0)                                                | [M+Cl] <sup>-</sup> | C23H41O7P     | 495.22839 | 495.22791 | -1.0 | 7.6E+04 |
| 339 | Hydroxy-epi-brassinolide                                                | [M+H] <sup>+</sup>  | C28H48O7      | 497.34728 | 497.34658 | -1.4 | 5.9E+05 |
| 340 | 1alpha,25-dihydroxy-24a-homo-26,27-dimethyl-22-thiavitamin D3           | [M+Na] <sup>+</sup> | C29H48O3S     | 499.32164 | 499.32148 | -0.3 | 4.8E+05 |
| 341 | Dihydroxy-dimethyl-hexadecydro-dihomovitamin D3                         | [M+Cl] <sup>-</sup> | C31H46O3      | 501.31410 | 501.31297 | -2.2 | 7.3E+04 |
| 342 | Lucidine B                                                              | [M+Cl] <sup>-</sup> | C30H49N3O     | 502.35696 | 502.35821 | 2.5  | 5.7E+04 |
| 343 | Mucronine A                                                             | [M+H] <sup>+</sup>  | C29H38N4O4    | 507.29658 | 507.29758 | 2.0  | 7.9E+05 |
| 344 | Diterpenoid EF-D                                                        | [M+Cl] <sup>-</sup> | C27H38O7      | 509.23116 | 509.23146 | 0.6  | 1.5E+05 |
| 345 | N-stearoyl tryptophan                                                   | [M+K] <sup>+</sup>  | C29H46N2O3    | 509.31400 | 509.31475 | 1.5  | 1.6E+06 |

|     |                                                                         |         |               |           |           |      |         |
|-----|-------------------------------------------------------------------------|---------|---------------|-----------|-----------|------|---------|
| 346 | 6-Hydroxyluteolin 3'-methyl ether 6,7-disulfate                         | [M+Cl]- | C16H12O13S2   | 510.94133 | 510.94097 | -0.7 | 5.9E+04 |
| 347 | PA(21:4(6Z,9Z,12Z,15Z)/0:0)                                             | [M+Na]+ | C24H44NO7P    | 512.27476 | 512.27603 | 2.5  | 3.7E+05 |
| 348 | PS(O-18:0/0:0)                                                          | [M+H]+  | C24H50NO8P    | 512.33468 | 512.33529 | 1.2  | 5.4E+05 |
| 349 | Dihydroxy-(hydroxypropoxy)-norvitamin D3                                | [M+Cl]- | C29H50O5      | 513.33523 | 513.33525 | 0.0  | 2.1E+05 |
| 350 | 26,27-diethyl-1alpha,25-dihydroxy-22-thiavitamin D3                     | [M+Na]+ | C30H50O3S     | 513.33729 | 513.33645 | -1.6 | 4.8E+05 |
| 351 | 11-O-Demethylpradinone II                                               | [M+K]+  | C24H16O11     | 519.03242 | 519.03150 | -1.8 | 3.4E+05 |
| 352 | Dolichyl diphosphate                                                    | [M+H]+  | C25H46O7P2    | 521.27915 | 521.28068 | 2.9  | 4.0E+05 |
| 353 | PG(19:0/0:0)                                                            | [M+H]+  | C25H51O9P     | 527.33435 | 527.33367 | -1.3 | 7.4E+05 |
| 354 | 1-docosanoyl-glycero-3-phosphate                                        | [M+Cl]- | C25H51O7P     | 529.30664 | 529.30691 | 0.5  | 2.7E+05 |
| 355 | 11-trans-LTD4                                                           | [M+Cl]- | C25H40N2O6S   | 531.23011 | 531.22933 | -1.5 | 1.1E+05 |
| 356 | Arg-Pro-Lys-Pro                                                         | [M+Cl]- | C22H40N8O5    | 531.28157 | 531.28167 | 0.2  | 8.7E+04 |
| 357 | 1D-myo-Inositol 1,3,4,5-tetrakisphosphate                               | [M+K]+  | C6H16O18P4    | 538.89187 | 538.89108 | -1.5 | 3.0E+05 |
| 358 | LysoPC(18:2(9Z,12Z))                                                    | [M+Na]+ | C26H50NO7P    | 542.32171 | 542.32138 | -0.6 | 3.4E+05 |
| 359 | 11alpha-Hemiglutaryloxy-1,25-dihydroxyvitamin D3                        | [M-H]-  | C33H52O6      | 543.36911 | 543.36858 | -1.0 | 8.7E+04 |
| 360 | PS(17:1/0:0)                                                            | [M+K]+  | C23H44NO9P    | 548.23853 | 548.23736 | -2.1 | 4.6E+05 |
| 361 | Octadienoyl-deoxyphorbol-acetate                                        | [M+K]+  | C30H40O7      | 551.24056 | 551.23901 | -2.8 | 3.8E+05 |
| 362 | Phoslactomycin B                                                        | [M+K]+  | C25H40NO8P    | 552.21231 | 552.21161 | -1.3 | 3.1E+05 |
| 363 | 11-Hydroxyiridodial glucoside pentaacetate                              | [M-H]-  | C26H36O13     | 555.20831 | 555.20848 | 0.3  | 1.4E+05 |
| 364 | Hypercalin B                                                            | [M+K]+  | C33H42O5      | 557.26638 | 557.26505 | -2.4 | 3.1E+05 |
| 365 | PC(16:0/2:0)                                                            | [M+Na]+ | C26H52NO8P    | 560.33227 | 560.33185 | -0.8 | 3.1E+05 |
| 366 | 11-(4-acetoxymethylphenyl)-1alpha,25-dihydroxy-9,11-didehydrovitamin D3 | [M+H]+  | C36H50O5      | 563.37310 | 563.37373 | 1.1  | 2.2E+06 |
| 367 | 31-hydroxy-32,35-anhydrobacteriohopanetetrol                            | [M+Na]+ | C35H60O4      | 567.43838 | 567.43796 | -0.7 | 3.5E+05 |
| 368 | Carboxy-hydroxy-norcholanyl-b-D-Glucopyranosiduronic acid               | [M+H]+  | C30H48O10     | 569.33202 | 569.33214 | 0.2  | 4.4E+05 |
| 369 | Coroglaucigenin-3-o-alpha-L-rhamnopyranoside                            | [M+Cl]- | C29H44O9      | 571.26793 | 571.26902 | 1.9  | 7.1E+04 |
| 370 | Isopentenyladenosine-5'-triphosphate                                    | [M-H]-  | C15H24N5O13P3 | 574.05107 | 574.05178 | 1.2  | 6.7E+04 |
| 371 | beta-Carotene 5,6-epoxide                                               | [M+Na]+ | C40H56O       | 575.42234 | 575.42188 | -0.8 | 3.9E+05 |
| 372 | Coumermic acid                                                          | [M+Cl]- | C27H21N3O10   | 582.09210 | 582.09118 | -1.6 | 7.1E+04 |
| 373 | (+)-Myristinin A                                                        | [M+Cl]- | C33H40O7      | 583.24681 | 583.24624 | -1.0 | 8.1E+04 |
| 374 | 35-aminobacteriohopane-32,33,34-triol                                   | [M+K]+  | C35H63NO3     | 584.44395 | 584.44283 | -1.9 | 3.7E+05 |
| 375 | DG(14:0/18:3/0:0)                                                       | [M+Na]+ | C35H62O5      | 585.44895 | 585.44812 | -1.4 | 5.6E+05 |
| 376 | Cer(d18:2/20:0)                                                         | [M-H]-  | C38H73NO3     | 590.55177 | 590.55237 | 1.0  | 6.5E+04 |
| 377 | 14:1 Cholesteryl ester                                                  | [M-H]-  | C41H70O2      | 593.53031 | 593.53097 | 1.1  | 1.1E+05 |
| 378 | stigmast-5-en-3beta-ol 3-O-beta-D-glucopyranoside                       | [M+Na]+ | C35H60O6      | 599.42821 | 599.42875 | 0.9  | 7.6E+05 |
| 379 | 1-dodecanoyl-2-(9Z,12Z-heptadecadienoyl)-glycero-3-phosphate            | [M-H]-  | C32H59O8P     | 601.38748 | 601.38740 | -0.1 | 1.1E+05 |
| 380 | 1-(4Z,7Z,10Z,13Z,16Z,19Z-docosaheptaenoyl)-glycero-3-phosphoserine      | [M+Cl]- | C28H44NO9P    | 604.24477 | 604.24481 | 0.1  | 7.5E+04 |
| 381 | PS(22:0/0:0)                                                            | [M+Na]+ | C28H56NO9P    | 604.35849 | 604.35875 | 0.4  | 4.6E+05 |
| 382 | Tetrahydrofolyl-[Glu](2)                                                | [M+Cl]- | C24H30N8O9    | 609.18298 | 609.18242 | -0.9 | 5.6E+05 |
| 383 | Ergocristine                                                            | [M+H]+  | C35H39N5O5    | 610.30240 | 610.30173 | -1.1 | 6.5E+05 |

|     |                                                                             |         |               |           |           |      |         |
|-----|-----------------------------------------------------------------------------|---------|---------------|-----------|-----------|------|---------|
| 384 | Glutathione disulfide                                                       | [M-H]-  | C20H32N6O12S2 | 611.14469 | 611.14480 | 0.2  | 1.9E+05 |
| 385 | PI(19:1/0:0)                                                                | [M+H]+  | C28H53O12P    | 613.33474 | 613.33522 | 0.8  | 6.2E+05 |
| 386 | 1-eicosyl-glycero-3-phospho-(1'-myo-inositol)                               | [M-H]-  | C29H59O11P    | 613.37222 | 613.37271 | 0.8  | 6.1E+04 |
| 387 | 1-(1Z-hexadecenyl)-2-(9Z-pentadecenoyl)-glycero-3-phosphate                 | [M-H]-  | C34H65O7P     | 615.43951 | 615.44043 | 1.5  | 1.4E+05 |
| 388 | 3,4-Dihydro-spheroidenone                                                   | [M+Cl]- | C41H60O2      | 619.42873 | 619.42823 | -0.8 | 1.0E+05 |
| 389 | Squalamine                                                                  | [M+H]+  | C34H65N3O5S   | 628.47177 | 628.47238 | 1.0  | 1.0E+06 |
| 390 | DG(14:0/22:6/0:0)                                                           | [M+Na]+ | C39H64O5      | 635.46460 | 635.46520 | 1.0  | 9.1E+05 |
| 391 | PI(19:0/0:0)                                                                | [M+Na]+ | C28H55O12P    | 637.33233 | 637.33311 | 1.2  | 6.3E+05 |
| 392 | Glycocholic acid 3-glucuronide                                              | [M-H]-  | C32H53NO12    | 642.34950 | 642.34822 | -2.0 | 6.3E+04 |
| 393 | 1-Palmitoyl-2-(5-keto-8-oxo-6-octenoyl)-sn-glycero-3-phosphatidylcholine    | [M-H]-  | C32H58NO10P   | 646.37256 | 646.37121 | -2.1 | 5.6E+04 |
| 394 | Quercetagenin 4'-methyl ether 7-(6-(E)-caffeoylglucoside)                   | [M-H]-  | C31H28O16     | 655.13046 | 655.13039 | -0.1 | 9.4E+04 |
| 395 | PA(O-18:0/14:0)                                                             | [M+Na]+ | C35H71O7P     | 657.48296 | 657.48410 | 1.7  | 6.1E+05 |
| 396 | 14-Deacetylnudicauline                                                      | [M-H]-  | C36H48N2O10   | 667.32362 | 667.32304 | -0.9 | 9.9E+04 |
| 397 | Patuletin 3-(6''-(E)-feruloylglucoside)                                     | [M-H]-  | C32H30O16     | 669.14611 | 669.14785 | 2.6  | 6.7E+04 |
| 398 | 1-octadecanoyl-2-(7Z,10Z,13Z,16Z-docosatetraenoyl)-sn-glycerol              | [M-H]-  | C43H76O5      | 671.56200 | 671.56103 | -1.4 | 6.5E+04 |
| 399 | Malvidin 3-rutinoside                                                       | [M+Cl]- | C29H35O16     | 674.16191 | 674.16276 | 1.3  | 1.0E+05 |
| 400 | Patuletin 3-(6''-p-coumaroylglucoside)                                      | [M+Cl]- | C31H28O15     | 675.11222 | 675.11301 | 1.2  | 7.2E+04 |
| 401 | N-Acetyl-leu-leu-leu-leu-tyr-amide                                          | [M+H]+  | C35H58N6O7    | 675.44397 | 675.44251 | -2.2 | 9.1E+05 |
| 402 | PG(O-16:0/14:1)                                                             | [M+H]+  | C36H71O9P     | 679.49085 | 679.48953 | -1.9 | 1.1E+06 |
| 403 | PS(O-16:0/13:0)                                                             | [M+H]+  | C35H70NO9P    | 680.48610 | 680.48616 | 0.1  | 4.1E+05 |
| 404 | N-ornithinyl-35-aminobacteriohopane-32,33,34-triol                          | [M+Na]+ | C40H73N3O4    | 682.54933 | 682.54815 | -1.7 | 4.6E+05 |
| 405 | PG(14:1(9Z)/14:1(9Z))                                                       | [M+Na]+ | C34H63O10P    | 685.40511 | 685.40428 | -1.2 | 9.4E+05 |
| 406 | SM(d18:0/13:0)                                                              | [M+Na]+ | C36H75N2O6P   | 685.52550 | 685.52439 | -1.6 | 5.8E+05 |
| 407 | Ceramide (d18:1/24:1(15Z))                                                  | [M+K]+  | C42H81NO3     | 686.58480 | 686.58338 | -2.1 | 5.9E+05 |
| 408 | Alpha-Tetrasaccharide                                                       | [M-H]-  | C26H45NO20    | 690.24622 | 690.24522 | -1.4 | 7.5E+04 |
| 409 | Hydroxyphthioceranic acid (C46)                                             | [M-H]-  | C46H92O3      | 691.69737 | 691.69844 | 1.5  | 7.8E+04 |
| 410 | PS(12:0/17:0)                                                               | [M+H]+  | C35H68NO10P   | 694.46536 | 694.46619 | 1.2  | 6.9E+05 |
| 411 | Episteryl oleate                                                            | [M+Cl]- | C46H78O2      | 697.56958 | 697.56932 | -0.4 | 1.1E+05 |
| 412 | DG(20:0/22:6/0:0)                                                           | [M+H]+  | C45H76O5      | 697.57655 | 697.57716 | 0.9  | 4.6E+05 |
| 413 | PA(P-20:0/17:2)                                                             | [M+H]+  | C40H75O7P     | 699.53232 | 699.53432 | 2.9  | 1.5E+06 |
| 414 | 1-Hexadecanoyl-2-(9Z-octadecenoyl)-sn-glycero-3-phosphonoethanolamine       | [M-H]-  | C39H76NO7P    | 700.52866 | 700.52956 | 1.3  | 8.2E+04 |
| 415 | 1-tetradecanyl-2-(8-[3]-ladderane-octanyl)-sn-glycerophosphocholine         | [M+H]+  | C42H80NO6P    | 726.57960 | 726.57859 | -1.4 | 5.5E+05 |
| 416 | SM(d18:0/16:0)                                                              | [M+Na]+ | C39H81N2O6P   | 727.57245 | 727.57257 | 0.2  | 1.1E+06 |
| 417 | 3,5-di-O-(beta-Glucopyranosyl) pelargonidin 6''-O-4, 6'''-O-1-cyclic malate | [M+Cl]- | C31H33O18     | 728.13609 | 728.13468 | -1.9 | 7.6E+04 |
| 418 | PA(P-20:0/19:1)                                                             | [M+H]+  | C42H81O7P     | 729.57927 | 729.57749 | -2.4 | 5.8E+05 |
| 419 | PG(13:0/20:2)                                                               | [M+H]+  | C39H73O10P    | 733.50141 | 733.49991 | -2.0 | 5.5E+05 |

|     |                                                                                                                |                     |             |           |           |      |         |
|-----|----------------------------------------------------------------------------------------------------------------|---------------------|-------------|-----------|-----------|------|---------|
| 420 | 1-tetradecanyl-2-(8-[3]-ladderane-octanyl)-sn-glycero-3-phospho-(1'-sn-glycerol)                               | [M+Na] <sup>+</sup> | C40H75O8P   | 737.50918 | 737.51099 | 2.5  | 7.9E+05 |
| 421 | 1-Hexadecanoyl-2-(9Z-octadecenoyl)-sn-glycero-3-phosphonoethanolamine                                          | [M+K] <sup>+</sup>  | C39H76NO7P  | 740.49910 | 740.49924 | 0.2  | 6.0E+05 |
| 422 | PA(15:0/22:6)                                                                                                  | [M+K] <sup>+</sup>  | C40H67O8P   | 745.42052 | 745.42211 | 2.1  | 4.6E+05 |
| 423 | DG(22:1/22:6/0:0)                                                                                              | [M+Na] <sup>+</sup> | C47H78O5    | 745.57415 | 745.57223 | -2.6 | 6.4E+05 |
| 424 | MGDG(18:3/16:3)                                                                                                | [M+H] <sup>+</sup>  | C43H70O10   | 747.50417 | 747.50347 | -0.9 | 1.6E+06 |
| 425 | CE(22:0)                                                                                                       | [M+K] <sup>+</sup>  | C49H88O2    | 747.64159 | 747.64227 | 0.9  | 6.4E+05 |
| 426 | PE(15:1/22:6)                                                                                                  | [M+H] <sup>+</sup>  | C42H70NO8P  | 748.49118 | 748.49317 | 2.7  | 7.3E+05 |
| 427 | PA(18:0/22:6)                                                                                                  | [M+H] <sup>+</sup>  | C43H73O8P   | 749.51158 | 749.51303 | 1.9  | 6.7E+05 |
| 428 | PG(O-16:0/18:3)                                                                                                | [M+Na] <sup>+</sup> | C40H75O9P   | 753.50409 | 753.50317 | -1.2 | 5.7E+05 |
| 429 | GlcCer(d18:2/20:0)                                                                                             | [M+H] <sup>+</sup>  | C44H83NO8   | 754.61915 | 754.61895 | -0.3 | 6.0E+05 |
| 430 | PC(O-16:0/O-18:0)                                                                                              | [M+Na] <sup>+</sup> | C42H88NO6P  | 756.62415 | 756.62308 | -1.4 | 5.6E+05 |
| 431 | PG(O-20:0/14:0)                                                                                                | [M+Na] <sup>+</sup> | C40H81O9P   | 759.55104 | 759.55129 | 0.3  | 3.0E+06 |
| 432 | PS(O-18:0/17:2)                                                                                                | [M+H] <sup>+</sup>  | C41H78NO9P  | 760.54870 | 760.55007 | 1.8  | 1.4E+06 |
| 433 | 1-hexadecyl-2-nonadecanoyl-sn-glycero-3-phosphocholine                                                         | [M-H] <sup>-</sup>  | C43H88NO7P  | 760.62256 | 760.62199 | -0.8 | 7.8E+04 |
| 434 | PI(12:0/15:1)                                                                                                  | [M+Na] <sup>+</sup> | C36H67O13P  | 761.42115 | 761.42173 | 0.8  | 1.1E+06 |
| 435 | PG(O-16:0/20:2)                                                                                                | [M+H] <sup>+</sup>  | C42H81O9P   | 761.56910 | 761.56716 | -2.5 | 8.2E+05 |
| 436 | OH-Chlorobactene glucoside ester                                                                               | [M+Cl] <sup>-</sup> | C47H68O6    | 763.47099 | 763.47283 | 2.4  | 3.6E+05 |
| 437 | 1-hexadecanoyl-2-(13Z,16Z-docosadienoyl)-glycero-3-phosphate                                                   | [M+Cl] <sup>-</sup> | C41H77O8P   | 763.50501 | 763.50368 | -1.7 | 1.8E+05 |
| 438 | 1-(11Z-eicosenoyl)-2-(4Z,7Z,10Z,13Z,16Z,19Z-docosahexaenoyl)-glycero-3-phosphate                               | [M-H] <sup>-</sup>  | C45H75O8P   | 773.51268 | 773.51443 | 2.3  | 1.0E+05 |
| 439 | PS(13:0/22:1)                                                                                                  | [M+H] <sup>+</sup>  | C41H78NO10P | 776.54361 | 776.54359 | 0.0  | 6.1E+05 |
| 440 | MGDG(16:0/18:2)                                                                                                | [M+Na] <sup>+</sup> | C43H78O10   | 777.54872 | 777.54656 | -2.8 | 6.4E+05 |
| 441 | GlcCer(d18:2/22:0)                                                                                             | [M+H] <sup>+</sup>  | C46H87NO8   | 782.65045 | 782.64911 | -1.7 | 1.3E+06 |
| 442 | PI(18:0/12:0)                                                                                                  | [M+H] <sup>+</sup>  | C39H75O13P  | 783.50181 | 783.50032 | -1.9 | 6.9E+05 |
| 443 | SM(d18:1/22:1)                                                                                                 | [M+H] <sup>+</sup>  | C45H89N2O6P | 785.65310 | 785.65094 | -2.8 | 6.1E+05 |
| 444 | PE(22:0/P-18:1(11Z))                                                                                           | [M+H] <sup>+</sup>  | C45H88NO7P  | 786.63712 | 786.63646 | -0.8 | 4.7E+05 |
| 445 | Oligomycin A                                                                                                   | [M+H] <sup>+</sup>  | C45H74O11   | 791.53039 | 791.53257 | 2.8  | 1.1E+06 |
| 446 | 1,2-di-(6Z,9Z,12Z,15Z-octadecatetraenoyl)-sn-glycero-3-phospho-(1'-sn-glycerol)                                | [M+Cl] <sup>-</sup> | C42H67O10P  | 797.41659 | 797.41569 | -1.1 | 1.0E+05 |
| 447 | SM(d18:0/22:2(13Z,16Z)(OH))                                                                                    | [M+H] <sup>+</sup>  | C45H87N2O7P | 799.63237 | 799.63006 | -2.9 | 1.3E+06 |
| 448 | 1-(1Z-eicosenyl)-2-(9Z-nonadecenoyl)-glycero-3-phospho-(1'-sn-glycerol)                                        | [M-H] <sup>-</sup>  | C45H87O9P   | 801.60149 | 801.59948 | -2.5 | 7.1E+04 |
| 449 | 1-(3Z,6Z,9Z,12Z,15Z-octadecapentaenoyl)-2-(6Z,9Z,12Z,15Z-octadecatetraenoyl)-3-O-beta-D-galactosyl-sn-glycerol | [M+Cl] <sup>-</sup> | C45H68O10   | 803.45065 | 803.45122 | 0.7  | 1.3E+05 |
| 450 | PG(16:0/22:2(13Z,16Z))                                                                                         | [M+H] <sup>+</sup>  | C44H83O10P  | 803.57966 | 803.58004 | 0.5  | 2.8E+06 |
| 451 | PE(22:2/P-18:1)                                                                                                | [M+Na] <sup>+</sup> | C45H84NO7P  | 804.58776 | 804.58649 | -1.6 | 1.4E+06 |
| 452 | PG(O-18:0/22:4(7Z,10Z,13Z,16Z))                                                                                | [M+H] <sup>+</sup>  | C46H85O9P   | 813.60040 | 813.60092 | 0.6  | 8.1E+05 |

|     |                                                                                               |                     |                |           |           |      |         |
|-----|-----------------------------------------------------------------------------------------------|---------------------|----------------|-----------|-----------|------|---------|
| 453 | PS(15:0/22:6)                                                                                 | [M+Na] <sup>+</sup> | C43H72NO10P    | 816.47860 | 816.48038 | 2.2  | 4.9E+05 |
| 454 | Laricitrin 3,7,5'-triglucoside                                                                | [M-H] <sup>-</sup>  | C34H42O23      | 817.20441 | 817.20640 | 2.4  | 7.9E+04 |
| 455 | PI(13:0/20:4)                                                                                 | [M+H] <sup>+</sup>  | C42H73O13P     | 817.48616 | 817.48641 | 0.3  | 7.0E+05 |
| 456 | Staphyloxanthin                                                                               | [M+H] <sup>+</sup>  | C51H78O8       | 819.57695 | 819.57794 | 1.2  | 1.4E+06 |
| 457 | Malvidin 3-glucoside-5-(6'''-malonyl-2'''-sulfatoglucoside)                                   | [M-H] <sup>-</sup>  | C32H37O23S     | 820.13736 | 820.13729 | -0.1 | 8.6E+04 |
| 458 | PE(18:1/22:2)                                                                                 | [M+Na] <sup>+</sup> | C45H84NO8P     | 820.58268 | 820.58503 | 2.9  | 7.1E+05 |
| 459 | 1-(8-[5]-ladderane-octanyl)-2-(8-[3]-ladderane-octanyl)-sn-glycero-3-phospho-(1'-sn-glycerol) | [M+Cl] <sup>-</sup> | C46H77O8P      | 823.50501 | 823.50740 | 2.9  | 8.0E+04 |
| 460 | PA(22:0/22:6)                                                                                 | [M+Na] <sup>+</sup> | C47H81O8P      | 827.55613 | 827.55556 | -0.7 | 8.3E+05 |
| 461 | PS(15:0/22:0)                                                                                 | [M+Na] <sup>+</sup> | C43H84NO10P    | 828.57251 | 828.57080 | -2.1 | 4.4E+05 |
| 462 | 3,5-Di-O-galloyl-4-O-digalloylquinic acid                                                     | [M+Cl] <sup>-</sup> | C35H28O22      | 835.07662 | 835.07434 | -2.7 | 6.7E+04 |
| 463 | 1-Hexadecanoyl-2-(9Z-octadecenoyl)-sn-glycero-3-phospho-1'-myo-inositol                       | [M-H] <sup>-</sup>  | C43H81O13P     | 835.53420 | 835.53340 | -1.0 | 9.7E+04 |
| 464 | Isobutyryl-CoA                                                                                | [M-H] <sup>-</sup>  | C25H42N7O17P3S | 836.14980 | 836.15174 | 2.3  | 1.0E+05 |
| 465 | PI(13:0/20:5)                                                                                 | [M+Na] <sup>+</sup> | C42H71O13P     | 837.45245 | 837.45473 | 2.7  | 8.4E+05 |
| 466 | PG(17:2/22:6)                                                                                 | [M+K] <sup>+</sup>  | C45H73O10P     | 843.45729 | 843.45783 | 0.6  | 7.2E+05 |
| 467 | PG(19:0/22:2)                                                                                 | [M+H] <sup>+</sup>  | C47H89O10P     | 845.62661 | 845.62809 | 1.7  | 6.2E+05 |
| 468 | PE(20:5/24:1)                                                                                 | [M+H] <sup>+</sup>  | C49H86NO8P     | 848.61638 | 848.61828 | 2.2  | 1.5E+06 |
| 469 | SM(d18:2/24:1)                                                                                | [M+K] <sup>+</sup>  | C47H91N2O6P    | 849.62463 | 849.62662 | 2.3  | 8.4E+05 |
| 470 | PI(17:0/14:1)                                                                                 | [M+K] <sup>+</sup>  | C40H78NO13P    | 850.48424 | 850.48246 | -2.1 | 4.6E+05 |
| 471 | PG(18:4/22:6)                                                                                 | [M+K] <sup>+</sup>  | C46H71O10P     | 853.44164 | 853.44306 | 1.7  | 7.3E+05 |
| 472 | TG(16:0/16:0/18:2)                                                                            | [M+Na] <sup>+</sup> | C53H98O6       | 853.72556 | 853.72526 | -0.4 | 5.9E+05 |
| 473 | PG(18:3/22:6)                                                                                 | [M+K] <sup>+</sup>  | C46H73O10P     | 855.45729 | 855.45735 | 0.1  | 1.1E+06 |
| 474 | PI(O-20:0/17:2)                                                                               | [M+H] <sup>+</sup>  | C46H87O12P     | 863.60079 | 863.60218 | 1.6  | 1.2E+06 |
| 475 | 1-eicosanoyl-2-(13Z,16Z-docosadienoyl)-glycero-3-phosphoserine                                | [M-H] <sup>-</sup>  | C48H90NO10P    | 870.62296 | 870.62246 | -0.6 | 7.6E+04 |
| 476 | TG(16:0/16:0/18:1)                                                                            | [M+K] <sup>+</sup>  | C53H100O6      | 871.71515 | 871.71404 | -1.3 | 8.0E+05 |
| 477 | 7-Hydroxylpradimicin A                                                                        | [M+Na] <sup>+</sup> | C40H44N2O19    | 879.24305 | 879.24285 | -0.2 | 5.8E+05 |
| 478 | PG(O-20:0/22:4)                                                                               | [M+K] <sup>+</sup>  | C48H89O9P      | 879.58758 | 879.58563 | -2.2 | 6.8E+05 |
| 479 | 1-octadecanoyl-2-(9Z,12Z-octadecadienoyl)-sn-glycero-3-phospho-(1'-sn-glycerol-3'-phosphate)  | [M+Cl] <sup>-</sup> | C42H80O13P2    | 889.47682 | 889.47628 | -0.6 | 5.1E+04 |
| 480 | PI(O-20:0/19:1)                                                                               | [M+H] <sup>+</sup>  | C48H93O12P     | 893.64774 | 893.64640 | -1.5 | 6.8E+05 |
| 481 | Delphinidin 3-(6''-O-4-malyl-glucoside)-5-(6'''-O-1-malyl-glucoside)                          | [M+Cl] <sup>-</sup> | C35H39O25      | 894.14744 | 894.14556 | -2.1 | 4.7E+04 |
| 482 | PI(16:0/20:0)                                                                                 | [M+K] <sup>+</sup>  | C45H87O13P     | 905.55159 | 905.55092 | -0.7 | 6.0E+05 |
| 483 | PG(22:1/22:2)                                                                                 | [M+Na] <sup>+</sup> | C50H93O10P     | 907.63986 | 907.64251 | 2.9  | 7.0E+05 |
| 484 | PE(24:0/24:0)                                                                                 | [M+H] <sup>+</sup>  | C53H106NO8P    | 916.77288 | 916.77492 | 2.2  | 4.8E+05 |
| 485 | PI(O-18:0/22:4)                                                                               | [M+Na] <sup>+</sup> | C49H89O12P     | 923.59839 | 923.59815 | -0.3 | 4.6E+05 |
| 486 | bacteriohopane-,32,33,34-triol-35-(N-(9-cyclohexyl-nonanoyl))-glucosamine                     | [M+H] <sup>+</sup>  | C56H99NO9      | 930.73926 | 930.74112 | 2.0  | 3.7E+05 |
| 487 | PIP(16:0/18:0)                                                                                | [M+Na] <sup>+</sup> | C43H84O16P2    | 941.51268 | 941.51459 | 2.0  | 3.6E+05 |

|     |                                                                                            |                     |                |           |           |      |         |
|-----|--------------------------------------------------------------------------------------------|---------------------|----------------|-----------|-----------|------|---------|
| 488 | Disialyllactose                                                                            | [M+Na] <sup>+</sup> | C34H56N2O27    | 947.29627 | 947.29904 | 2.9  | 3.6E+05 |
| 489 | TG(16:0/20:1/20:4)[iso6]                                                                   | [M+K] <sup>+</sup>  | C59H104O6      | 947.74645 | 947.74365 | -3.0 | 8.9E+05 |
| 490 | PI(19:1/22:4)                                                                              | [M+Na] <sup>+</sup> | C50H87O13P     | 949.57765 | 949.57959 | 2.0  | 5.1E+05 |
| 491 | Bis(5'-adenosyl) pentaphosphate                                                            | [M+Cl] <sup>-</sup> | C20H29N10O22P5 | 950.98400 | 950.98282 | -1.2 | 1.2E+05 |
| 492 | 1,4-Dihydroxy-2-naphthoyl-CoA                                                              | [M-H] <sup>-</sup>  | C32H42N7O19P3S | 952.13963 | 952.14124 | 1.7  | 6.1E+04 |
| 493 | 3,5-Dihydroxyphenylacetyl-CoA                                                              | [M+K] <sup>+</sup>  | C29H42N7O19P3S | 956.11006 | 956.11173 | 1.7  | 3.5E+05 |
| 494 | 1-octadecanoyl-2-docosanoyl-glycero-3-phospho-(1'-myo-inositol)                            | [M+Cl] <sup>-</sup> | C49H95O13P     | 957.62043 | 957.61849 | -2.0 | 8.1E+04 |
| 495 | Patuletin 3-(2"-feruloylglucosyl)-(1->6)-[apiosyl-(1->2)-glucoside]                        | [M-H] <sup>-</sup>  | C43H48O25      | 963.24119 | 963.24203 | 0.9  | 1.2E+05 |
| 496 | TG(17:1/22:6)                                                                              | [M+H] <sup>+</sup>  | C64H98O6       | 963.74362 | 963.74469 | 1.1  | 1.0E+06 |
| 497 | PC(22:1/24:1)                                                                              | [M+K] <sup>+</sup>  | C54H104NO8P    | 964.71312 | 964.71218 | -1.0 | 4.5E+05 |
| 498 | TG(17:1/20:1/20:1)                                                                         | [M+K] <sup>+</sup>  | C60H110O6      | 965.79340 | 965.79520 | 1.9  | 3.7E+05 |
| 499 | PIP2(16:0/16:2)                                                                            | [M+H] <sup>+</sup>  | C41H77O19P3    | 967.43447 | 967.43211 | -2.4 | 3.4E+05 |
| 500 | 1-(11Z-eicosenoyl)-2-(7Z,10Z,13Z,16Z-docosatetraenoyl)-glycero-3-phospho-(1'-myo-inositol) | [M+Cl] <sup>-</sup> | C51H89O13P     | 975.57348 | 975.57113 | -2.4 | 1.3E+05 |
| 501 | PI(20:2/22:4)                                                                              | [M+K] <sup>+</sup>  | C51H87O13P     | 977.55159 | 977.54885 | -2.8 | 5.0E+05 |
| 502 | TG(22:5/18:2/22:6)                                                                         | [M+H] <sup>+</sup>  | C65H100O6      | 977.75927 | 977.76163 | 2.4  | 4.0E+05 |
| 503 | 2-O-nonadecanoyl-3-O-(2S,4S-dimethyl-tetracosanoyl)-alpha,alpha-trehalose                  | [M-H] <sup>-</sup>  | C57H108O13     | 999.77172 | 999.77139 | -0.3 | 1.2E+05 |

<sup>a</sup>Cer: Ceramide; GalCer: Galactosylceramide; GlcCer: Glucosylceramide; Glc-GP: phosphatidylglucose; LacCer: Lactosylceramide; MG: Monoacylglycerol; DAT: Acyltrehaloses; DG: Diacylglycerol; TG: Triacylglycerol; MGDG: Monoacyldiacylglycerol; PA: Phosphatidic acid; PC: Phosphatidylcholine; PE: Phosphatidylethanolamine; PG: Glycerophospholipids; PI: Phosphatidylinositol; PIP2: phosphatidylinositol bisphosphate; PS: Phosphatidylserine; SM: Sphingomyelin.

<sup>b</sup>Theor. stands for calculated exact mass to charge ratio.

<sup>c</sup>Exp. stands for experimental *m/z* value.

<sup>d</sup>The error expressed in parts per million (ppm).

**Table S4.** ESI FT-ICR MS comprehensive list of metabolites detected in SurM 10K.

| #  | Putative Annotation (M) <sup>a</sup> | Ion     | Formula  | Theor. <i>m/z</i> <sup>b</sup> | Exp. <i>m/z</i> <sup>c</sup> | ppm <sup>d</sup> | Peak_Height |
|----|--------------------------------------|---------|----------|--------------------------------|------------------------------|------------------|-------------|
| 1  | Putrescine                           | [M-H]-  | C4H12N2  | 87.09277                       | 87.09280                     | 0.3              | 2.6E+04     |
| 2  | 2-Aminoacrylate                      | [M+H]+  | C3H5NO2  | 88.03930                       | 88.03933                     | 0.3              | 4.2E+04     |
| 3  | Pyruvic acid                         | [M+H]+  | C3H4O3   | 89.02332                       | 89.02335                     | 0.3              | 6.3E+04     |
| 4  | 1-Pentanol                           | [M+H]+  | C5H12O   | 89.09609                       | 89.09601                     | -0.9             | 4.4E+04     |
| 5  | 2,3-Butanediol                       | [M+H]+  | C4H10O2  | 91.07536                       | 91.07556                     | 2.2              | 5.8E+04     |
| 6  | Vinyl ether                          | [M+Na]+ | C4H6O    | 93.03109                       | 93.03130                     | 2.3              | 5.6E+04     |
| 7  | Sulfuric acid                        | [M-H]-  | H2SO4    | 96.96010                       | 96.96033                     | 2.3              | 2.7E+05     |
| 8  | Orthophosphate                       | [M-H]-  | H3PO4    | 96.96962                       | 96.96971                     | 0.9              | 1.9E+05     |
| 9  | Isopropylamine                       | [M+K]+  | C3H9N    | 98.03666                       | 98.03690                     | 2.5              | 4.1E+04     |
| 10 | Propyl mercaptan                     | [M+Na]+ | C3H8S    | 99.02389                       | 99.02374                     | -1.5             | 3.5E+04     |
| 11 | Cyclohexylamine                      | [M+H]+  | C6H13N   | 100.11208                      | 100.11216                    | 0.8              | 4.3E+04     |
| 12 | <i>N</i> -Nitrosodiethylamine        | [M+H]+  | C4H10N2O | 103.08659                      | 103.08680                    | 2.0              | 4.5E+04     |
| 13 | Sulfite                              | [M+Na]+ | H2SO3    | 104.96169                      | 104.96172                    | 0.3              | 4.4E+04     |
| 14 | Styrene                              | [M+H]+  | C8H8     | 105.06988                      | 105.06996                    | 0.8              | 5.0E+04     |
| 15 | Thiocarbohydrazide                   | [M+H]+  | CH6N4S   | 107.03859                      | 107.03870                    | 1.0              | 6.1E+04     |
| 16 | 1-Pyrroline                          | [M+K]+  | C4H7N    | 108.02101                      | 108.02101                    | 0.0              | 3.6E+04     |
| 17 | Pyruvaldehyde                        | [M+K]+  | C3H4O2   | 110.98429                      | 110.98438                    | 0.8              | 3.7E+04     |
| 18 | 2-Furoic acid                        | [M-H]-  | C5H4O3   | 111.00877                      | 111.00879                    | 0.2              | 8.1E+04     |
| 19 | Nitrofurane                          | [M-H]-  | C4H3NO3  | 112.00402                      | 112.00384                    | -1.6             | 1.5E+04     |
| 20 | 2-Furoic acid                        | [M+H]+  | C5H4O3   | 113.02332                      | 113.02353                    | 1.9              | 3.9E+04     |
| 21 | 2-hexenedial                         | [M+H]+  | C6H8O2   | 113.05971                      | 113.05939                    | -2.8             | 3.5E+04     |
| 22 | Glycine                              | [M+K]+  | C2H5NO2  | 113.99519                      | 113.99515                    | -0.3             | 5.3E+04     |
| 23 | Fumaric acid                         | [M-H]-  | C4H4O4   | 115.00368                      | 115.00391                    | 2.0              | 3.0E+04     |
| 24 | L-Valine                             | [M+H]+  | C5H11NO2 | 118.08626                      | 118.08599                    | -2.2             | 9.6E+04     |
| 25 | Purine                               | [M-H]-  | C5H4N4   | 119.03632                      | 119.03604                    | -2.4             | 1.3E+04     |
| 26 | Maleimide                            | [M+Na]+ | C4H3NO2  | 120.00560                      | 120.00547                    | -1.1             | 3.8E+04     |
| 27 | Hexenal                              | [M+Na]+ | C6H10O   | 121.06239                      | 121.06240                    | 0.1              | 4.2E+04     |
| 28 | Formyl phosphate                     | [M-H]-  | CH3O5P   | 124.96453                      | 124.96467                    | 1.1              | 1.9E+04     |
| 29 | Valeric acid                         | [M+Na]+ | C5H10O2  | 125.05730                      | 125.05737                    | 0.6              | 4.6E+04     |
| 30 | Gamma-Aminobutyric acid              | [M+Na]+ | C4H9NO2  | 126.05255                      | 126.05219                    | -2.8             | 4.1E+04     |
| 31 | <i>N</i> -Cyclohexylformamide        | [M-H]-  | C7H13NO  | 126.09244                      | 126.09238                    | -0.5             | 1.2E+04     |
| 32 | Alanine                              | [M+K]+  | C3H7NO2  | 128.01084                      | 128.01072                    | -0.9             | 3.8E+04     |
| 33 | 4-Oxoproline                         | [M-H]-  | C5H7NO3  | 128.03532                      | 128.03532                    | 0.0              | 1.1E+05     |
| 34 | Lactic acid                          | [M+K]+  | C3H6O3   | 128.99485                      | 128.99524                    | 3.0              | 7.1E+04     |
| 35 | 2-methyl-2Z-hexenoic acid            | [M+H]+  | C7H12O2  | 129.09101                      | 129.09065                    | -2.8             | 4.2E+04     |
| 36 | L-Leucine                            | [M-H]-  | C6H13NO2 | 130.08735                      | 130.08725                    | -0.8             | 1.3E+05     |



| #  | Putative Annotation (M) <sup>a</sup> | Ion                 | Formula   | Theor. m/z <sup>b</sup> | Exp. m/z <sup>c</sup> | ppm <sup>d</sup> | Peak_Height |
|----|--------------------------------------|---------------------|-----------|-------------------------|-----------------------|------------------|-------------|
| 37 | Glycerol                             | [M+K] <sup>+</sup>  | C3H8O3    | 131.01050               | 131.01085             | 2.6              | 9.3E+04     |
| 38 | L-Asparagine                         | [M-H] <sup>-</sup>  | C4H8N2O3  | 131.04622               | 131.04592             | -2.3             | 2.6E+04     |
| 39 | Cresol                               | [M+Na] <sup>+</sup> | C7H8O     | 131.04674               | 131.04653             | -1.6             | 3.7E+04     |
| 40 | Indoleamine                          | [M-H] <sup>-</sup>  | C8H8N2    | 131.06147               | 131.06145             | -0.2             | 1.8E+04     |
| 41 | L-Aspartic acid                      | [M-H] <sup>-</sup>  | C4H7NO4   | 132.03023               | 132.03009             | -1.1             | 2.7E+05     |
| 42 | L-Leucine                            | [M+H] <sup>+</sup>  | C6H13NO2  | 132.10191               | 132.10199             | 0.6              | 1.3E+05     |
| 43 | Dimethyl sulfone                     | [M+K] <sup>+</sup>  | C2H6O2S   | 132.97201               | 132.97195             | -0.5             | 4.2E+04     |
| 44 | L-Malic acid                         | [M-H] <sup>-</sup>  | C4H6O5    | 133.01425               | 133.01430             | 0.4              | 8.5E+05     |
| 45 | Phenylacetaldoxime                   | [M-H] <sup>-</sup>  | C8H9NO    | 134.06114               | 134.06128             | 1.1              | 4.7E+04     |
| 46 | (+)-3-Carene                         | [M-H] <sup>-</sup>  | C10H16    | 135.11792               | 135.11783             | -0.7             | 3.2E+04     |
| 47 | Adenine                              | [M+H] <sup>+</sup>  | C5H5N5    | 136.06177               | 136.06188             | 0.8              | 6.7E+04     |
| 48 | 2-Phenylacetamide                    | [M+H] <sup>+</sup>  | C8H9NO    | 136.07569               | 136.07601             | 2.3              | 5.1E+04     |
| 49 | 8-Hydroxypurine                      | [M-H] <sup>-</sup>  | C5H6N4O   | 137.04688               | 137.04704             | 1.1              | 3.9E+04     |
| 50 | N-Methylnicotinamide                 | [M+H] <sup>+</sup>  | C7H8N2O   | 137.07094               | 137.07131             | 2.7              | 3.8E+04     |
| 51 | L-Proline                            | [M+Na] <sup>+</sup> | C5H9NO2   | 138.05255               | 138.05233             | -1.6             | 4.9E+04     |
| 52 | Tiglic acid                          | [M+K] <sup>+</sup>  | C5H8O2    | 139.01559               | 139.01566             | 0.5              | 6.3E+04     |
| 53 | 1-Hexen-1-ol                         | [M+K] <sup>+</sup>  | C6H12O    | 139.05197               | 139.05186             | -0.8             | 4.6E+04     |
| 54 | 5-Aminopentanal                      | [M+K] <sup>+</sup>  | C5H11NO   | 140.04722               | 140.04709             | -1.0             | 5.1E+04     |
| 55 | Betaine                              | [M+Na] <sup>+</sup> | C5H11NO2  | 140.06820               | 140.06802             | -1.3             | 7.2E+04     |
| 56 | 2-Mercaptoethanesulfonate            | [M-H] <sup>-</sup>  | C2H6O3S2  | 140.96856               | 140.96830             | -1.8             | 1.7E+04     |
| 57 | 2-Octenoic acid                      | [M-H] <sup>-</sup>  | C8H14O2   | 141.09210               | 141.09251             | 2.9              | 2.7E+04     |
| 58 | Proline betaine                      | [M-H] <sup>-</sup>  | C7H13NO2  | 142.08735               | 142.08749             | 1.0              | 1.0E+05     |
| 59 | cis,trans-Hexadienedioate            | [M+H] <sup>+</sup>  | C6H6O4    | 143.03389               | 143.03423             | 2.4              | 4.7E+04     |
| 60 | 3-Hexenedioic acid                   | [M-H] <sup>-</sup>  | C6H8O4    | 143.03498               | 143.03491             | -0.5             | 2.0E+04     |
| 61 | 1-(3-Aminopropyl)-4-aminobutanal     | [M-H] <sup>-</sup>  | C7H16N2O  | 143.11899               | 143.11906             | 0.5              | 9.3E+03     |
| 62 | Benzaldehyde                         | [M+K] <sup>+</sup>  | C7H6O     | 145.00502               | 145.00490             | -0.9             | 3.9E+04     |
| 63 | L-Glutamine                          | [M-H] <sup>-</sup>  | C5H10N2O3 | 145.06187               | 145.06225             | 2.7              | 3.3E+04     |
| 64 | L-Glutamic acid                      | [M-H] <sup>-</sup>  | C5H9NO4   | 146.04588               | 146.04578             | -0.7             | 4.0E+05     |
| 65 | 4-Guanidinobutanoate                 | [M+H] <sup>+</sup>  | C5H11N3O2 | 146.09240               | 146.09206             | -2.3             | 5.3E+04     |
| 66 | L-Lysinamide                         | [M+H] <sup>+</sup>  | C6H15N3O  | 146.12879               | 146.12894             | 1.0              | 6.4E+04     |
| 67 | L-Lysine                             | [M+H] <sup>+</sup>  | C6H14N2O2 | 147.11280               | 147.11285             | 0.3              | 4.5E+05     |
| 68 | Dimethyl trisulfide                  | [M+Na] <sup>+</sup> | C2H6S3    | 148.95238               | 148.95250             | 0.8              | 4.1E+04     |
| 69 | 2,5-Dihydroxypyridine                | [M+K] <sup>+</sup>  | C5H5NO2   | 149.99519               | 149.99557             | 2.5              | 8.1E+04     |
| 70 | Cytosine                             | [M+K] <sup>+</sup>  | C4H5N3O   | 150.00642               | 150.00663             | 1.4              | 4.3E+04     |
| 71 | Thiobenzamide S-oxide                | [M-H] <sup>-</sup>  | C7H7NOS   | 152.01756               | 152.01785             | 1.9              | 4.2E+04     |
| 72 | Quinoline                            | [M+Na] <sup>+</sup> | C9H7N     | 152.04707               | 152.04669             | -2.5             | 1.1E+05     |
| 73 | Dopamine                             | [M-H] <sup>-</sup>  | C8H11NO2  | 152.07170               | 152.07210             | 2.6              | 2.7E+04     |
| 74 | Dihydrouracil                        | [M+K] <sup>+</sup>  | C4H6N2O2  | 153.00609               | 153.00574             | -2.3             | 4.1E+04     |

| #   | Putative Annotation (M) <sup>a</sup> | Ion                 | Formula   | Theor. m/z <sup>b</sup> | Exp. m/z <sup>c</sup> | ppm <sup>d</sup> | Peak_Height |
|-----|--------------------------------------|---------------------|-----------|-------------------------|-----------------------|------------------|-------------|
| 75  | 2Z-Hexenoic acid                     | [M+K] <sup>+</sup>  | C6H10O2   | 153.03124               | 153.03114             | -0.6             | 1.1E+05     |
| 76  | Proline                              | [M+K] <sup>+</sup>  | C5H9NO2   | 154.02649               | 154.02687             | 2.5              | 1.1E+05     |
| 77  | Leucine                              | [M+Na] <sup>+</sup> | C6H13NO2  | 154.08385               | 154.08431             | 3.0              | 3.4E+05     |
| 78  | Glycerol 1,2-cyclic phosphate        | [M+H] <sup>+</sup>  | C3H7O5P   | 155.01039               | 155.01065             | 1.7              | 7.4E+04     |
| 79  | 2,3-Dihydroxybenzoate                | [M+H] <sup>+</sup>  | C7H6O4    | 155.03389               | 155.03360             | -1.8             | 4.2E+04     |
| 80  | Dicyclopentadiene                    | [M+Na] <sup>+</sup> | C10H12    | 155.08312               | 155.08278             | -2.2             | 5.6E+04     |
| 81  | L-1-Aminopropan-2-ol O-phosphate     | [M+H] <sup>+</sup>  | C3H10NO4P | 156.04202               | 156.04231             | 1.9              | 5.1E+05     |
| 82  | Histidine                            | [M+H] <sup>+</sup>  | C6H9N3O2  | 156.07675               | 156.07685             | 0.6              | 1.2E+05     |
| 83  | Cinnamyl alcohol                     | [M+Na] <sup>+</sup> | C9H10O    | 157.06239               | 157.06261             | 1.4              | 6.9E+05     |
| 84  | 1,2-Naphthoquinone                   | [M+H] <sup>+</sup>  | C10H6O2   | 159.04406               | 159.04424             | 1.2              | 4.5E+04     |
| 85  | D-Alanyl-D-alanine                   | [M-H] <sup>-</sup>  | C6H12N2O3 | 159.07752               | 159.07784             | 2.0              | 1.1E+04     |
| 86  | Cysteine                             | [M+K] <sup>+</sup>  | C3H7NO2S  | 159.98291               | 159.98288             | -0.2             | 5.1E+04     |
| 87  | 2-Deoxy-3-keto-scylo-inosamine       | [M-H] <sup>-</sup>  | C6H11NO4  | 160.06153               | 160.06187             | 2.1              | 4.0E+04     |
| 88  | 3-Hydroxybenzaldehyde                | [M+K] <sup>+</sup>  | C7H6O2    | 160.99994               | 161.00014             | 1.2              | 5.9E+04     |
| 89  | 3-Ethylcatechol                      | [M+Na] <sup>+</sup> | C8H10O2   | 161.05730               | 161.05773             | 2.7              | 5.5E+04     |
| 90  | 3,4-Dihydroxybenzylamine             | [M+Na] <sup>+</sup> | C7H9NO2   | 162.05255               | 162.05258             | 0.2              | 5.1E+04     |
| 91  | (R)-Nicotine                         | [M+H] <sup>+</sup>  | C10H14N2  | 163.12297               | 163.12304             | 0.4              | 7.8E+04     |
| 92  | (2-Aminoethyl)phosphonate            | [M+K] <sup>+</sup>  | C2H8NO3P  | 163.98734               | 163.98715             | -1.2             | 4.8E+04     |
| 93  | D-Phenylalanine                      | [M-H] <sup>-</sup>  | C9H11NO2  | 164.07170               | 164.07185             | 0.9              | 7.4E+04     |
| 94  | 6-Dimethylaminopurine                | [M+H] <sup>+</sup>  | C7H9N5    | 164.09307               | 164.09293             | -0.9             | 6.4E+04     |
| 95  | 2-Dehydro-D-xylonate                 | [M+H] <sup>+</sup>  | C5H8O6    | 165.03936               | 165.03983             | 2.8              | 7.3E+04     |
| 96  | 1-Methylxanthine                     | [M-H] <sup>-</sup>  | C6H6N4O2  | 165.04180               | 165.04139             | -2.5             | 2.1E+04     |
| 97  | 2,3,6-Trihydroxypyridine             | [M+K] <sup>+</sup>  | C5H5NO3   | 165.99010               | 165.98978             | -1.9             | 7.2E+04     |
| 98  | 3-Hydroxy-L-proline                  | [M+Cl] <sup>-</sup> | C5H9NO3   | 166.02764               | 166.02793             | 1.7              | 4.9E+04     |
| 99  | 3-Pyridinebutanoic acid              | [M+H] <sup>+</sup>  | C9H11NO2  | 166.08626               | 166.08623             | -0.2             | 1.5E+05     |
| 100 | Leucine                              | [M+K] <sup>+</sup>  | C6H13NO2  | 170.05779               | 170.05807             | 1.7              | 2.8E+05     |
| 101 | Asparagine                           | [M+K] <sup>+</sup>  | C4H8N2O3  | 171.01665               | 171.01690             | 1.5              | 7.3E+04     |
| 102 | Propylthiouracil                     | [M+H] <sup>+</sup>  | C7H10N2OS | 171.05866               | 171.05856             | -0.6             | 6.5E+04     |
| 103 | Ureidoglycine                        | [M+K] <sup>+</sup>  | C3H7N3O3  | 172.01190               | 172.01195             | 0.3              | 5.0E+04     |
| 104 | Phenylpropanoic acid                 | [M+Na] <sup>+</sup> | C9H10O2   | 173.05730               | 173.05774             | 2.5              | 2.5E+05     |
| 105 | 2-Octenedioic acid                   | [M+H] <sup>+</sup>  | C8H12O4   | 173.08084               | 173.08124             | 2.3              | 1.2E+05     |
| 106 | 2E,8E-Undecadiene-4,6-dienoic acid   | [M+H] <sup>+</sup>  | C11H10O2  | 175.07536               | 175.07485             | -2.9             | 1.1E+05     |
| 107 | L-Arginine                           | [M+H] <sup>+</sup>  | C6H14N4O2 | 175.11895               | 175.11894             | -0.1             | 1.1E+06     |
| 108 | Tyramine                             | [M+K] <sup>+</sup>  | C8H11NO   | 176.04722               | 176.04728             | 0.3              | 5.4E+04     |
| 109 | L-Hypoglycin                         | [M+Cl] <sup>-</sup> | C7H11NO2  | 176.04838               | 176.04841             | 0.2              | 1.4E+04     |
| 110 | L-Histidinol                         | [M+Cl] <sup>-</sup> | C6H11N3O  | 176.05961               | 176.05927             | -2.0             | 3.9E+04     |
| 111 | Thien-2-ylacetate                    | [M+Cl] <sup>-</sup> | C6H6O2S   | 176.97825               | 176.97867             | 2.4              | 9.7E+03     |
| 112 | 2-Methylnaphthalene                  | [M+Cl] <sup>-</sup> | C11H10    | 177.04765               | 177.04814             | 2.8              | 1.1E+04     |

| #   | Putative Annotation (M) <sup>a</sup>     | Ion                 | Formula   | Theor. m/z <sup>b</sup> | Exp. m/z <sup>c</sup> | ppm <sup>d</sup> | Peak_Height |
|-----|------------------------------------------|---------------------|-----------|-------------------------|-----------------------|------------------|-------------|
| 113 | Allantoic acid                           | [M+H] <sup>+</sup>  | C4H8N4O4  | 177.06183               | 177.06222             | 2.2              | 8.0E+04     |
| 114 | 5-Methyl-3-isoxazolyl sulfate            | [M-H] <sup>-</sup>  | C4H5NO5S  | 177.98157               | 177.98168             | 0.6              | 3.0E+04     |
| 115 | Dehydrospermidine                        | [M+Cl] <sup>-</sup> | C7H17N3   | 178.11165               | 178.11184             | 1.1              | 2.8E+04     |
| 116 | 2,3,5-Trihydroxytoluene                  | [M+K] <sup>+</sup>  | C7H8O3    | 179.01050               | 179.01018             | -1.8             | 5.3E+04     |
| 117 | 2E,5-Hexadienyl acetate                  | [M+K] <sup>+</sup>  | C8H12O2   | 179.04689               | 179.04651             | -2.1             | 7.7E+04     |
| 118 | D-Aldose                                 | [M-H] <sup>-</sup>  | C6H12O6   | 179.05611               | 179.05632             | 1.2              | 2.1E+05     |
| 119 | Capraldehyde                             | [M+Na] <sup>+</sup> | C10H20O   | 179.14064               | 179.14086             | 1.3              | 5.4E+04     |
| 120 | 5-Nitrofurfural                          | [M+K] <sup>+</sup>  | C5H3NO4   | 179.96937               | 179.96895             | -2.3             | 5.7E+04     |
| 121 | D-Tyrosine                               | [M-H] <sup>-</sup>  | C9H11NO3  | 180.06662               | 180.06631             | -1.7             | 3.0E+04     |
| 122 | Glucosamine                              | [M+H] <sup>+</sup>  | C6H13NO5  | 180.08665               | 180.08678             | 0.7              | 2.1E+05     |
| 123 | 2-Octenoic acid                          | [M+K] <sup>+</sup>  | C8H14O2   | 181.06254               | 181.06280             | 1.4              | 9.5E+04     |
| 124 | 8-Hydroxy-7-methylguanine                | [M+H] <sup>+</sup>  | C6H7N5O2  | 182.06725               | 182.06707             | -1.0             | 5.8E+04     |
| 125 | Acenaphthenequinone                      | [M+H] <sup>+</sup>  | C12H6O2   | 183.04406               | 183.04412             | 0.4              | 5.6E+04     |
| 126 | Diisopropyl phosphate                    | [M+H] <sup>+</sup>  | C6H15O4P  | 183.07807               | 183.07792             | -0.8             | 7.3E+04     |
| 127 | 2-Thiophenesulfonamide                   | [M+Na] <sup>+</sup> | C4H5NO2S2 | 185.96539               | 185.96484             | -3.0             | 5.1E+04     |
| 128 | D-Glutamic acid                          | [M+K] <sup>+</sup>  | C5H9NO4   | 186.01632               | 186.01654             | 1.2              | 5.4E+04     |
| 129 | 3-Hydroxy-L-glutamate                    | [M+Na] <sup>+</sup> | C5H9NO5   | 186.03729               | 186.03717             | -0.7             | 9.0E+04     |
| 130 | 2-Deoxy-scylo-inosamine                  | [M+Na] <sup>+</sup> | C6H13NO4  | 186.07368               | 186.07407             | 2.1              | 7.4E+04     |
| 131 | (+/-)-trans-Acenaphthene-1,2-diol        | [M+H] <sup>+</sup>  | C12H10O2  | 187.07536               | 187.07509             | -1.4             | 6.2E+04     |
| 132 | Trimethyl-L-lysine                       | [M-H] <sup>-</sup>  | C9H20N2O2 | 187.14520               | 187.14480             | -2.1             | 3.4E+04     |
| 133 | D-Methionine                             | [M+K] <sup>+</sup>  | C5H11NO2S | 188.01421               | 188.01449             | 1.5              | 6.6E+04     |
| 134 | L-Phenylalanine                          | [M+Na] <sup>+</sup> | C9H11NO2  | 188.06820               | 188.06828             | 0.4              | 1.9E+05     |
| 135 | Phthalic acid                            | [M+Na] <sup>+</sup> | C8H6O4    | 189.01583               | 189.01553             | -1.6             | 1.3E+05     |
| 136 | 2-tridecene-4,7-diynal                   | [M+H] <sup>+</sup>  | C13H16O   | 189.12739               | 189.12713             | -1.4             | 8.8E+04     |
| 137 | Thioguanine                              | [M+Na] <sup>+</sup> | C5H5N5S   | 190.01579               | 190.01612             | 1.8              | 8.4E+04     |
| 138 | N-Amidino-L-glutamate                    | [M+H] <sup>+</sup>  | C6H11N3O4 | 190.08223               | 190.08270             | 2.5              | 5.7E+04     |
| 139 | Citric acid                              | [M-H] <sup>-</sup>  | C6H8O7    | 191.01973               | 191.01974             | 0.1              | 1.0E+06     |
| 140 | Vanillic acid                            | [M+Na] <sup>+</sup> | C8H8O4    | 191.03148               | 191.03102             | -2.4             | 7.5E+04     |
| 141 | 1,2-Dihydroxy-7-hydroxymethylnaphthalene | [M+H] <sup>+</sup>  | C11H10O3  | 191.07027               | 191.06992             | -1.8             | 8.4E+04     |
| 142 | (+)-Camphor                              | [M+K] <sup>+</sup>  | C10H16O   | 191.08327               | 191.08311             | -0.9             | 5.5E+04     |
| 143 | Isopropylmaleate                         | [M+Cl] <sup>-</sup> | C7H10O4   | 193.02731               | 193.02692             | -2.0             | 2.9E+04     |
| 144 | 1,2-Epoxy-3-(p-Nitrophenoxy)propane      | [M-H] <sup>-</sup>  | C9H9NO4   | 194.04588               | 194.04618             | 1.5              | 1.3E+04     |
| 145 | 5-oxo-7-octenoic acid                    | [M+K] <sup>+</sup>  | C8H12O3   | 195.04180               | 195.04203             | 1.2              | 8.0E+04     |
| 146 | 4-Hydroxynonenal                         | [M+K] <sup>+</sup>  | C9H16O2   | 195.07819               | 195.07826             | 0.4              | 1.1E+05     |
| 147 | Coryneine                                | [M-H] <sup>-</sup>  | C11H18NO2 | 195.12648               | 195.12680             | 1.7              | 4.2E+04     |
| 148 | 1-Nitrosonaphthalene                     | [M+K] <sup>+</sup>  | C10H7NO   | 196.01592               | 196.01588             | -0.2             | 7.0E+04     |
| 149 | Nicotine imine                           | [M+Cl] <sup>-</sup> | C10H13N2  | 196.07728               | 196.07750             | 1.2              | 3.7E+04     |
| 150 | Putreanine                               | [M+Cl] <sup>-</sup> | C7H17N2O2 | 196.09840               | 196.09820             | -1.0             | 1.9E+04     |

| #   | Putative Annotation (M) <sup>a</sup>                | Ion                 | Formula   | Theor. m/z <sup>b</sup> | Exp. m/z <sup>c</sup> | ppm <sup>d</sup> | Peak_Height |
|-----|-----------------------------------------------------|---------------------|-----------|-------------------------|-----------------------|------------------|-------------|
| 151 | Phenolic phosphate                                  | [M+Na] <sup>+</sup> | C6H7O4P   | 196.99742               | 196.99776             | 1.7              | 8.1E+04     |
| 152 | N-Acetyl-L-aspartate                                | [M+Na] <sup>+</sup> | C6H9NO5   | 198.03729               | 198.03737             | 0.4              | 9.4E+04     |
| 153 | 2-Amino-5-phosphopentanoic acid                     | [M+H] <sup>+</sup>  | C5H12NO5P | 198.05259               | 198.05243             | -0.8             | 1.4E+05     |
| 154 | Phosphoenol-4-deoxy-3-tetulosonate                  | [M+H] <sup>+</sup>  | C4H7O7P   | 199.00022               | 199.00007             | -0.7             | 6.5E+04     |
| 155 | 10-hydroxy-8E-Decene-2,4,6-triynoic acid            | [M+Na] <sup>+</sup> | C10H8O3   | 199.03656               | 199.03615             | -2.1             | 7.7E+04     |
| 156 | 2R-hydroxy-octanoic acid                            | [M+K] <sup>+</sup>  | C8H16O3   | 199.07310               | 199.07359             | 2.4              | 9.7E+04     |
| 157 | Dodecanoic acid                                     | [M-H] <sup>-</sup>  | C12H24O2  | 199.17035               | 199.17070             | 1.7              | 6.2E+04     |
| 158 | L-Carnitine                                         | [M+K] <sup>+</sup>  | C7H15NO3  | 200.06835               | 200.06858             | 1.1              | 6.4E+04     |
| 159 | Nicotine imine                                      | [M+K] <sup>+</sup>  | C10H13N2  | 200.07103               | 200.07123             | 1.0              | 7.0E+04     |
| 160 | 1-Ethyl-2-benzimidazolinone                         | [M+K] <sup>+</sup>  | C9H10N2O  | 201.04247               | 201.04230             | -0.9             | 7.9E+04     |
| 161 | 1-Phenylpropyl acetate                              | [M+Na] <sup>+</sup> | C11H14O2  | 201.08860               | 201.08908             | 2.4              | 2.4E+05     |
| 162 | (5-Phenyl-1,2,4-triazol-3-yl)urea                   | [M-H] <sup>-</sup>  | C9H9N5O   | 202.07343               | 202.07302             | -2.1             | 1.2E+04     |
| 163 | D-Aldose                                            | [M+Na] <sup>+</sup> | C6H12O6   | 203.05261               | 203.05265             | 0.2              | 9.1E+06     |
| 164 | Pantothenol                                         | [M-H] <sup>-</sup>  | C9H19NO4  | 204.12413               | 204.12439             | 1.3              | 1.2E+04     |
| 165 | D-Sorbitol                                          | [M+Na] <sup>+</sup> | C6H14O6   | 205.06826               | 205.06816             | -0.5             | 1.4E+05     |
| 166 | 2-dodecenal                                         | [M+Na] <sup>+</sup> | C12H22O   | 205.15629               | 205.15669             | 2.0              | 7.2E+04     |
| 167 | Tetradecatrienal                                    | [M-H] <sup>-</sup>  | C14H22O   | 205.15979               | 205.15980             | 0.1              | 3.2E+04     |
| 168 | 4-Toluenesulfonamide                                | [M+Cl] <sup>-</sup> | C7H9NO2S  | 206.00480               | 206.00435             | -2.2             | 2.2E+04     |
| 169 | Cyclo(deltaAla-L-Val)                               | [M+K] <sup>+</sup>  | C8H12N2O2 | 207.05304               | 207.05322             | 0.9              | 1.2E+05     |
| 170 | Benzidine                                           | [M+Na] <sup>+</sup> | C12H12N2  | 207.08927               | 207.08983             | 2.7              | 1.0E+05     |
| 171 | Phenolic phosphate                                  | [M+Cl] <sup>-</sup> | C6H7O4P   | 208.97760               | 208.97798             | 1.8              | 3.1E+04     |
| 172 | 2-Propylglutaric acid                               | [M+Cl] <sup>-</sup> | C8H14O4   | 209.05861               | 209.05911             | 2.4              | 3.9E+04     |
| 173 | Tyr-Oet                                             | [M+H] <sup>+</sup>  | C11H15NO3 | 210.11247               | 210.11217             | -1.4             | 1.3E+05     |
| 174 | Nonanedioic acid                                    | [M+Na] <sup>+</sup> | C9H16O4   | 211.09408               | 211.09444             | 1.7              | 7.4E+04     |
| 175 | 1,4-Diguanidinobutane                               | [M+K] <sup>+</sup>  | C6H16N6   | 211.10680               | 211.10652             | -1.3             | 1.4E+05     |
| 176 | Phospho-L-aspartate                                 | [M-H] <sup>-</sup>  | C4H8NO7P  | 211.99656               | 211.99664             | 0.4              | 1.5E+04     |
| 177 | Benzyl nicotinate                                   | [M-H] <sup>-</sup>  | C13H11NO2 | 212.07170               | 212.07125             | -2.1             | 7.1E+04     |
| 178 | 1-Phenyl-5-mercaptotetrazole                        | [M+Cl] <sup>-</sup> | C7H6N4S   | 213.00072               | 213.00033             | -1.8             | 7.2E+04     |
| 179 | 7-Cyano-7-deazaguanine                              | [M+K] <sup>+</sup>  | C7H5N5O   | 214.01257               | 214.01201             | -2.6             | 9.4E+04     |
| 180 | 2-C-Methyl-D-erythritol 4-phosphate                 | [M-H] <sup>-</sup>  | C5H13O7P  | 215.03261               | 215.03297             | 1.7              | 6.9E+05     |
| 181 | Undecanedioic acid                                  | [M+H] <sup>+</sup>  | C11H20O4  | 217.14344               | 217.14388             | 2.0              | 8.0E+04     |
| 182 | (R)-3-Hydroxydodecanoic acid                        | [M+H] <sup>+</sup>  | C12H24O3  | 217.17982               | 217.17947             | -1.6             | 7.3E+04     |
| 183 | 4-Nitrophenyl phosphate                             | [M-H] <sup>-</sup>  | C6H6NO6P  | 217.98600               | 217.98661             | 2.8              | 4.4E+04     |
| 184 | N-gamma-Nitro-L-arginine                            | [M-H] <sup>-</sup>  | C6H13N5O4 | 218.08948               | 218.08951             | 0.2              | 1.2E+04     |
| 185 | Aldohexose                                          | [M+K] <sup>+</sup>  | C6H12O6   | 219.02655               | 219.02654             | 0.0              | 1.4E+07     |
| 186 | cis-2'-Carboxybenzalpyruvate                        | [M+H] <sup>+</sup>  | C11H8O5   | 221.04445               | 221.04486             | 1.9              | 2.2E+05     |
| 187 | 4-Amino-2-hydroxylamino-6-nitrotoluene              | [M+K] <sup>+</sup>  | C7H9N3O3  | 222.02755               | 222.02777             | 1.0              | 9.6E+04     |
| 188 | 2,6-Diamino-4-hydroxy-5-N-methylformamidopyrimidine | [M+K] <sup>+</sup>  | C6H9N5O2  | 222.03878               | 222.03923             | 2.0              | 8.6E+04     |

| #   | Putative Annotation (M) <sup>a</sup>                          | Ion                 | Formula    | Theor. m/z <sup>b</sup> | Exp. m/z <sup>c</sup> | ppm <sup>d</sup> | Peak_Height |
|-----|---------------------------------------------------------------|---------------------|------------|-------------------------|-----------------------|------------------|-------------|
| 189 | 2E-Decenedioic acid                                           | [M+Na] <sup>+</sup> | C10H16O4   | 223.09408               | 223.09422             | 0.6              | 1.1E+05     |
| 190 | Methyl jasmonate                                              | [M-H] <sup>-</sup>  | C13H20O3   | 223.13397               | 223.13366             | -1.4             | 2.6E+04     |
| 191 | cis-2-Carboxycyclohexyl-acetic acid                           | [M+K] <sup>+</sup>  | C9H14O4    | 225.05237               | 225.05240             | 0.1              | 7.7E+04     |
| 192 | 5-Acetylamino-6-formylamino-3-methyluracil                    | [M+H] <sup>+</sup>  | C8H10N4O4  | 227.07748               | 227.07751             | 0.1              | 1.5E+05     |
| 193 | (R)-3-Hydroxydecanoic acid                                    | [M+K] <sup>+</sup>  | C10H20O3   | 227.10440               | 227.10506             | 2.9              | 7.6E+04     |
| 194 | Myristic acid                                                 | [M-H] <sup>-</sup>  | C14H28O2   | 227.20165               | 227.20216             | 2.2              | 2.0E+05     |
| 195 | Prenyl-L-cysteine                                             | [M+K] <sup>+</sup>  | C8H15NO2S  | 228.04551               | 228.04506             | -2.0             | 9.5E+04     |
| 196 | 3-Hydroxy-N6,N6,N6-trimethyl-L-lysine                         | [M+Na] <sup>+</sup> | C9H21N2O3  | 228.14444               | 228.14464             | 0.9              | 1.6E+05     |
| 197 | L-alpha-Amino-gamma-oxalylaminobutyric acid                   | [M+K] <sup>+</sup>  | C6H10N2O5  | 229.02213               | 229.02266             | 2.3              | 1.7E+05     |
| 198 | Dihydroresveratrol                                            | [M-H] <sup>-</sup>  | C14H14O3   | 229.08702               | 229.08635             | -2.9             | 2.6E+04     |
| 199 | N-Acetyl-D-phenylalanine                                      | [M+Na] <sup>+</sup> | C11H13NO3  | 230.07876               | 230.07841             | -1.5             | 9.0E+04     |
| 200 | 2-Deoxy-2-dimethylamino-alpha-D-Glucose                       | [M+Na] <sup>+</sup> | C8H17NO5   | 230.09989               | 230.10033             | 1.9              | 9.6E+04     |
| 201 | 13-amino-tridecanoic acid                                     | [M+H] <sup>+</sup>  | C13H27NO2  | 230.21146               | 230.21151             | 0.2              | 1.2E+05     |
| 202 | 1,3-Diphenylpropane                                           | [M+Cl] <sup>-</sup> | C15H16     | 231.09460               | 231.09423             | -1.6             | 6.9E+04     |
| 203 | 3-Carbamoyl-2-phenylpropionic acid                            | [M+Na] <sup>+</sup> | C10H11NO4  | 232.05803               | 232.05768             | -1.5             | 1.1E+05     |
| 204 | N-Succinyl-L-glutamate 5-semialdehyde                         | [M+H] <sup>+</sup>  | C9H13NO6   | 232.08156               | 232.08220             | 2.7              | 8.7E+04     |
| 205 | 1-O-Methyl-myo-inositol                                       | [M+K] <sup>+</sup>  | C7H14O6    | 233.04220               | 233.04266             | 2.0              | 1.4E+05     |
| 206 | (R)-(Homo)3-citrate                                           | [M-H] <sup>-</sup>  | C9H14O7    | 233.06668               | 233.06653             | -0.6             | 1.5E+04     |
| 207 | tridecanal                                                    | [M+Cl] <sup>-</sup> | C13H26O    | 233.16777               | 233.16771             | -0.2             | 1.3E+04     |
| 208 | 3,7-Dimethyl-8,11-dioxo-2E,6E,9E-dodecatrienal                | [M+H] <sup>+</sup>  | C14H18O3   | 235.13287               | 235.13276             | -0.5             | 1.3E+05     |
| 209 | N-Heptanoylhomoserine lactone                                 | [M+Na] <sup>+</sup> | C11H19NO3  | 236.12571               | 236.12521             | -2.1             | 1.9E+05     |
| 210 | 2,4-Dinitrophenylhydrazine                                    | [M+K] <sup>+</sup>  | C6H6N4O4   | 237.00206               | 237.00268             | 2.6              | 9.9E+04     |
| 211 | (+)-(1R,2R)-1,2-Diphenylethane-1,2-diol                       | [M+Na] <sup>+</sup> | C14H14O2   | 237.08860               | 237.08829             | -1.3             | 1.0E+05     |
| 212 | 10,12-hexadecadienal                                          | [M+H] <sup>+</sup>  | C16H28O    | 237.22129               | 237.22107             | -0.9             | 9.8E+04     |
| 213 | Succinyl proline                                              | [M+Na] <sup>+</sup> | C9H13NO5   | 238.06859               | 238.06811             | -2.0             | 9.5E+04     |
| 214 | Oxaloglutarate                                                | [M+Cl] <sup>-</sup> | C7H8O7     | 238.99640               | 238.99581             | -2.5             | 1.5E+04     |
| 215 | 2E-Decenedioic acid                                           | [M+K] <sup>+</sup>  | C10H16O4   | 239.06802               | 239.06776             | -1.1             | 3.5E+05     |
| 216 | N6-Acetyl-N6-hydroxy-L-lysine                                 | [M+Cl] <sup>-</sup> | C8H16N2O4  | 239.08041               | 239.08016             | -1.0             | 1.4E+05     |
| 217 | 10Z-Tridecenyl acetate                                        | [M-H] <sup>-</sup>  | C15H28O2   | 239.20165               | 239.20134             | -1.3             | 2.4E+04     |
| 218 | (1R,6R)-2-Succinyl-6-hydroxy-2,4-cyclohexadiene-1-carboxylate | [M+H] <sup>+</sup>  | C11H12O6   | 241.07066               | 241.07124             | 2.4              | 1.4E+05     |
| 219 | Thymidine                                                     | [M-H] <sup>-</sup>  | C10H14N2O5 | 241.08300               | 241.08269             | -1.3             | 2.7E+05     |
| 220 | Indolepyruvate                                                | [M+K] <sup>+</sup>  | C11H9NO3   | 242.02140               | 242.02139             | -0.1             | 1.4E+05     |
| 221 | 3-(Phosphoacetylamido)-L-alanine                              | [M+H] <sup>+</sup>  | C5H11N2O7P | 243.03766               | 243.03732             | -1.4             | 1.1E+05     |
| 222 | 12-methyl-tetradecanoic acid                                  | [M+H] <sup>+</sup>  | C15H30O2   | 243.23186               | 243.23182             | -0.2             | 1.2E+05     |
| 223 | 1-Hexadecanol                                                 | [M+H] <sup>+</sup>  | C16H34O    | 243.26824               | 243.26874             | 2.0              | 9.4E+04     |
| 224 | 3-(Dimethylamino)propyl benzoate                              | [M+K] <sup>+</sup>  | C12H17NO2  | 246.08909               | 246.08940             | 1.3              | 1.1E+05     |
| 225 | beta-Butoxyethyl nicotinate                                   | [M+Na] <sup>+</sup> | C12H17NO3  | 246.11006               | 246.10937             | -2.8             | 8.7E+04     |
| 226 | beta-Alanyl-L-arginine                                        | [M+H] <sup>+</sup>  | C9H19N5O3  | 246.15607               | 246.15607             | 0.0              | 2.5E+05     |

| #   | Putative Annotation (M) <sup>a</sup>             | Ion                 | Formula     | Theor. m/z <sup>b</sup> | Exp. m/z <sup>c</sup> | ppm <sup>d</sup> | Peak_Height |
|-----|--------------------------------------------------|---------------------|-------------|-------------------------|-----------------------|------------------|-------------|
| 227 | N-Acetyl-D-tryptophan                            | [M+H] <sup>+</sup>  | C13H14N2O3  | 247.10772               | 247.10826             | 2.2              | 9.3E+04     |
| 228 | L-beta-aspartyl-L-leucine                        | [M+H] <sup>+</sup>  | C10H18N2O5  | 247.12885               | 247.12887             | 0.1              | 9.1E+04     |
| 229 | Abcisic aldehyde                                 | [M-H] <sup>-</sup>  | C15H20O3    | 247.13397               | 247.13426             | 1.2              | 4.8E+04     |
| 230 | Pyridoxal 5'-phosphate                           | [M+H] <sup>+</sup>  | C8H10NO6P   | 248.03185               | 248.03178             | -0.3             | 1.3E+05     |
| 231 | 2-Hydroxyiminostilbene                           | [M+K] <sup>+</sup>  | C14H11NO    | 248.04722               | 248.04683             | -1.6             | 1.4E+05     |
| 232 | Deoxycytidine                                    | [M+Na] <sup>+</sup> | C9H13N3O4   | 250.07983               | 250.07913             | -2.8             | 8.4E+04     |
| 233 | Bergapten                                        | [M+Cl] <sup>-</sup> | C12H8O4     | 251.01166               | 251.01166             | 0.0              | 1.5E+04     |
| 234 | Tetradecadiene-4,6-dienoic acid                  | [M+Cl] <sup>-</sup> | C14H16O2    | 251.08443               | 251.08421             | -0.9             | 3.5E+04     |
| 235 | Diisopropyl phthalate                            | [M+H] <sup>+</sup>  | C14H18O4    | 251.12779               | 251.12717             | -2.5             | 1.1E+05     |
| 236 | (+)-(1R,2R)-1,2-Diphenylethane-1,2-diol          | [M+K] <sup>+</sup>  | C14H14O2    | 253.06254               | 253.06242             | -0.5             | 8.8E+04     |
| 237 | Palmitoleic acid                                 | [M-H] <sup>-</sup>  | C16H30O2    | 253.21730               | 253.21770             | 1.6              | 2.2E+05     |
| 238 | Succinyl proline                                 | [M+K] <sup>+</sup>  | C9H13NO5    | 254.04253               | 254.04236             | -0.7             | 1.9E+05     |
| 239 | Palmitic acid                                    | [M-H] <sup>-</sup>  | C16H32O2    | 255.23295               | 255.23279             | -0.6             | 4.7E+05     |
| 240 | N-D-Glucosylarylamine                            | [M+H] <sup>+</sup>  | C12H17NO5   | 256.11795               | 256.11829             | 1.3              | 1.2E+05     |
| 241 | 2E,4E,8E,10E-Dodecatetraenedioic acid            | [M+K] <sup>+</sup>  | C12H14O4    | 261.05237               | 261.05223             | -0.5             | 3.4E+05     |
| 242 | 7E,9E,11-Dodecatrienyl acetate                   | [M+K] <sup>+</sup>  | C14H22O2    | 261.12514               | 261.12459             | -2.1             | 9.8E+04     |
| 243 | Thiamine aldehyde                                | [M+H] <sup>+</sup>  | C12H15N4OS  | 264.10393               | 264.10334             | -2.2             | 1.2E+05     |
| 244 | 3,7,11-Trimethyl-2,6,10-dodecatrienyl acetate    | [M+H] <sup>+</sup>  | C17H28O2    | 265.21621               | 265.21680             | 2.2              | 2.0E+05     |
| 245 | D-erythro-1-(Imidazol-4-yl)glycerol 3-phosphate  | [M+Cl] <sup>-</sup> | C6H11N2O6P  | 273.00487               | 273.00560             | 2.7              | 6.5E+04     |
| 246 | Sarmentosin                                      | [M-H] <sup>-</sup>  | C11H17NO7   | 274.09323               | 274.09261             | -2.3             | 7.6E+04     |
| 247 | Oxyresveratrol                                   | [M+Cl] <sup>-</sup> | C14H12O4    | 279.04296               | 279.04249             | -1.7             | 4.7E+04     |
| 248 | 3,7,11-trimethyl-dodecanoic acid                 | [M+K] <sup>+</sup>  | C15H30O2    | 281.18774               | 281.18854             | 2.8              | 2.7E+05     |
| 249 | Oleic acid                                       | [M-H] <sup>-</sup>  | C18H34O2    | 281.24860               | 281.24938             | 2.8              | 6.2E+05     |
| 250 | Octadecanoic acid                                | [M-H] <sup>-</sup>  | C18H36O2    | 283.26425               | 283.26364             | -2.2             | 1.0E+06     |
| 251 | 2-(Formamido)-N1-(5-phospho-D-ribose)acetamidine | [M+H] <sup>+</sup>  | C6H12N3O8P  | 286.04348               | 286.04281             | -2.3             | 1.1E+05     |
| 252 | Thiamine                                         | [M+Na] <sup>+</sup> | C12H17N4OS  | 288.10153               | 288.10143             | -0.3             | 1.1E+05     |
| 253 | Nicotinate D-ribonucleoside                      | [M+Cl] <sup>-</sup> | C11H14NO6   | 291.05151               | 291.05089             | -2.1             | 3.0E+04     |
| 254 | Palmitic acid                                    | [M+K] <sup>+</sup>  | C16H32O2    | 295.20339               | 295.20360             | 0.7              | 2.3E+05     |
| 255 | 3,5,7-Trihydroxy-6,8-dimethylflavone             | [M-H] <sup>-</sup>  | C17H14O5    | 297.07685               | 297.07628             | -1.9             | 2.6E+05     |
| 256 | 7,7-Difluoro-8Z-dodecenyl acetate                | [M+Cl] <sup>-</sup> | C14H24F2O2  | 297.14384               | 297.14325             | -2.0             | 5.1E+04     |
| 257 | 13S-hydroxy-9Z,11E-octadecadienoic acid          | [M+H] <sup>+</sup>  | C18H32O3    | 297.24242               | 297.24231             | -0.4             | 2.7E+05     |
| 258 | PC(2:0/0:0)                                      | [M-H] <sup>-</sup>  | C10H22NO7P  | 298.10611               | 298.10548             | -2.1             | 3.2E+05     |
| 259 | Serratamic acid                                  | [M+Na] <sup>+</sup> | C13H25NO5   | 298.16249               | 298.16313             | 2.1              | 1.5E+05     |
| 260 | 2-Ethylhexyl phthalate                           | [M+Na] <sup>+</sup> | C16H22O4    | 301.14103               | 301.14068             | -1.2             | 1.2E+06     |
| 261 | Thymidine 3',5'-cyclic monophosphate             | [M-H] <sup>-</sup>  | C10H13N2O7P | 303.03876               | 303.03879             | 0.1              | 8.2E+04     |
| 262 | 9-Riburonosyladenine                             | [M+Na] <sup>+</sup> | C10H11N5O5  | 304.06524               | 304.06516             | -0.3             | 1.0E+05     |
| 263 | 2'-Deoxymugineic acid                            | [M+H] <sup>+</sup>  | C12H20N2O7  | 305.13433               | 305.13369             | -2.1             | 1.9E+05     |
| 264 | 4-Hydroxytestosterone                            | [M+H] <sup>+</sup>  | C19H28O3    | 305.21112               | 305.21169             | 1.9              | 1.1E+05     |

| #   | Putative Annotation (M) <sup>a</sup>                              | Ion                 | Formula      | Theor. m/z <sup>b</sup> | Exp. m/z <sup>c</sup> | ppm <sup>d</sup> | Peak_Height |
|-----|-------------------------------------------------------------------|---------------------|--------------|-------------------------|-----------------------|------------------|-------------|
| 265 | Adenosine                                                         | [M+K] <sup>+</sup>  | C10H13N5O4   | 306.05991               | 306.05906             | -2.8             | 1.1E+05     |
| 266 | Z-Gly-Pro                                                         | [M+H] <sup>+</sup>  | C15H18N2O5   | 307.12885               | 307.12929             | 1.4              | 2.3E+05     |
| 267 | Heptadecanediol                                                   | [M+Cl] <sup>-</sup> | C17H36O2     | 307.24093               | 307.24063             | -1.0             | 2.3E+04     |
| 268 | (1R)-Hydroxy-(2R)-N-acetyl-L-cysteinyl-1,2-dihydronaphthalene     | [M+H] <sup>+</sup>  | C15H17NO4S   | 308.09511               | 308.09514             | 0.1              | 2.8E+05     |
| 269 | N-Acetyl-a-neuraminic acid                                        | [M-H] <sup>-</sup>  | C11H19NO9    | 308.09870               | 308.09859             | -0.4             | 2.5E+05     |
| 270 | 5-Amino-6-(1-D-ribitylamino)uracil                                | [M+Cl] <sup>-</sup> | C9H16N4O6    | 311.07639               | 311.07720             | 2.6              | 1.2E+05     |
| 271 | L-Aspartyl-L-phenylalanine                                        | [M+Cl] <sup>-</sup> | C13H16N2O5   | 315.07532               | 315.07447             | -2.7             | 1.3E+05     |
| 272 | 1-O-Hexadecyl-sn-glycerol                                         | [M-H] <sup>-</sup>  | C19H40O3     | 315.29047               | 315.28968             | -2.5             | 1.2E+05     |
| 273 | Saphenic acid methyl ester                                        | [M+Cl] <sup>-</sup> | C16H14N2O3   | 317.06984               | 317.06964             | -0.6             | 4.2E+04     |
| 274 | Hydroxyeicosatetraenoic acid                                      | [M-H] <sup>-</sup>  | C20H32O3     | 319.22787               | 319.22711             | -2.4             | 1.7E+05     |
| 275 | 4-(3,5-Diphenylcyclohexyl)phenol                                  | [M-H] <sup>-</sup>  | C24H24O      | 327.17544               | 327.17621             | 2.4              | 1.8E+05     |
| 276 | 2,2'-(1-phenyl-1H-1,2,4-triazole-3,5-diyl)bis-phenol              | [M-H] <sup>-</sup>  | C20H15N3O2   | 328.10915               | 328.10868             | -1.4             | 4.9E+04     |
| 277 | 2-[3-Ethyl-5-(4-methoxyphenyl)-1H-pyrazol-4-yl]phenol             | [M+Cl] <sup>-</sup> | C18H18N2O2   | 329.10623               | 329.10623             | 0.0              | 6.2E+04     |
| 278 | {(3S)-3-[(2Z)-pent-2-en-1-yl]oxiran-2-ylidene} undec-9-enoic acid | [M+K] <sup>+</sup>  | C18H28O3     | 331.16700               | 331.16634             | -2.0             | 1.6E+05     |
| 279 | 4-Prenylresveratrol                                               | [M+K] <sup>+</sup>  | C19H20O3     | 335.10440               | 335.10396             | -1.3             | 3.3E+05     |
| 280 | Trihexyphenidyl                                                   | [M+Cl] <sup>-</sup> | C20H31NO     | 336.20997               | 336.20904             | -2.8             | 4.2E+04     |
| 281 | 11R,12S-epoxy-8-hydroxy-5Z,9E,14Z-eicosatrienoic acid             | [M+H] <sup>+</sup>  | C20H32O4     | 337.23734               | 337.23647             | -2.6             | 4.7E+05     |
| 282 | Dehydrophytosphingosine                                           | [M+Na] <sup>+</sup> | C18H37NO3    | 338.26656               | 338.26731             | 2.2              | 8.2E+05     |
| 283 | N1-Amidinostreptamine 6-phosphate                                 | [M+K] <sup>+</sup>  | C7H17N4O7P   | 339.04665               | 339.04668             | 0.1              | 1.4E+05     |
| 284 | 1-Dehydro-15alpha-hydroxytestololactone                           | [M+Na] <sup>+</sup> | C19H24O4     | 339.15668               | 339.15750             | 2.4              | 2.9E+05     |
| 285 | 4-Carboxy-4'-sulfoazobenzene                                      | [M+Cl] <sup>-</sup> | C13H10N2O5S  | 341.00044               | 341.00060             | 0.5              | 1.3E+05     |
| 286 | Lactose                                                           | [M-H] <sup>-</sup>  | C12H22O11    | 341.10894               | 341.10952             | 1.7              | 2.2E+05     |
| 287 | (+)-12-Isocopalene-15,16-dial                                     | [M+K] <sup>+</sup>  | C20H30O2     | 341.18774               | 341.18831             | 1.7              | 1.4E+05     |
| 288 | N,N,N-trimethyl-sphingosine                                       | [M-H] <sup>-</sup>  | C21H44NO2    | 341.32993               | 341.32938             | -1.6             | 4.8E+04     |
| 289 | 13-HETE                                                           | [M+Na] <sup>+</sup> | C20H31O3     | 342.21654               | 342.21606             | -1.4             | 1.4E+05     |
| 290 | 10,13-Eicosadienoic acid                                          | [M+K] <sup>+</sup>  | C20H32O2     | 343.20339               | 343.20407             | 2.0              | 5.4E+05     |
| 291 | Thiamin monophosphate                                             | [M+H] <sup>+</sup>  | C12H18N4O4PS | 346.08591               | 346.08622             | 0.9              | 1.1E+05     |
| 292 | O-Arachidonoyl Ethanolamine                                       | [M+H] <sup>+</sup>  | C22H37NO2    | 348.28971               | 348.28878             | -2.7             | 1.5E+05     |
| 293 | 2-O-(6-Phospho-alpha-mannosyl)-D-glycerate                        | [M+H] <sup>+</sup>  | C9H17O12P    | 349.05304               | 349.05319             | 0.4              | 1.3E+05     |
| 294 | Heneicosanoic acid                                                | [M+Na] <sup>+</sup> | C21H42O2     | 349.30770               | 349.30811             | 1.2              | 1.3E+05     |
| 295 | (4E,8E,9Me-d19:2)sphingosine                                      | [M+K] <sup>+</sup>  | C19H37NO2    | 350.24559               | 350.24493             | -1.9             | 1.3E+05     |
| 296 | 17-Propyl-5alpha-androst-2-en-17beta-ol                           | [M+Cl] <sup>-</sup> | C22H36O      | 351.24602               | 351.24668             | 1.9              | 1.2E+05     |
| 297 | Dopamine glucuronide                                              | [M+Na] <sup>+</sup> | C14H19NO8    | 352.10029               | 352.10005             | -0.7             | 1.4E+05     |
| 298 | 12a-Hydroxydolineone                                              | [M+H] <sup>+</sup>  | C19H12O7     | 353.06558               | 353.06501             | -1.6             | 1.7E+05     |
| 299 | Testosterone acetate                                              | [M+Na] <sup>+</sup> | C21H30O3     | 353.20872               | 353.20965             | 2.6              | 1.0E+06     |
| 300 | 2,5-Diamino-6-(5'-phosphoribosylamino)-4-pyrimidineone            | [M+H] <sup>+</sup>  | C9H16N5O8P   | 354.08093               | 354.08077             | -0.4             | 8.5E+05     |
| 301 | 11,12,15S-trihydroxy-5Z,8Z,13E-eicosatrienoic acid                | [M+H] <sup>+</sup>  | C20H34O5     | 355.24790               | 355.24707             | -2.3             | 2.4E+05     |
| 302 | Succinyl sulfathiazole                                            | [M+H] <sup>+</sup>  | C13H13N3O5S2 | 356.03694               | 356.03706             | 0.3              | 1.4E+05     |

| #   | Putative Annotation (M) <sup>a</sup>                                         | Ion                 | Formula     | Theor. m/z <sup>b</sup> | Exp. m/z <sup>c</sup> | ppm <sup>d</sup> | Peak_Height |
|-----|------------------------------------------------------------------------------|---------------------|-------------|-------------------------|-----------------------|------------------|-------------|
| 303 | (5,12,13-Triaza-indeno[1,2-b]anthracen-13-yl)-acetic acid ethylester         | [M+H] <sup>+</sup>  | C22H17N3O2  | 356.13935               | 356.13887             | -1.4             | 1.5E+05     |
| 304 | Trihydroxy-trimethylpyranodihydrochalcone                                    | [M+H] <sup>+</sup>  | C21H24O5    | 357.16965               | 357.17067             | 2.9              | 1.6E+05     |
| 305 | Tetrahydrodeoxycorticosterone                                                | [M+Na] <sup>+</sup> | C21H34O3    | 357.24002               | 357.24082             | 2.3              | 1.7E+05     |
| 306 | Nicotinate D-ribonucleotide                                                  | [M+Na] <sup>+</sup> | C11H15NO9P  | 359.03766               | 359.03861             | 2.6              | 1.2E+05     |
| 307 | 12(S)-HETE                                                                   | [M+K] <sup>+</sup>  | C20H32O3    | 359.19830               | 359.19919             | 2.5              | 2.0E+05     |
| 308 | Estra-1,3,5(10),16-tetraen-3-ol benzoate                                     | [M+H] <sup>+</sup>  | C25H26O2    | 359.20056               | 359.20041             | -0.4             | 1.8E+05     |
| 309 | 2',4',6'-Trihydroxy-3'-prenyldihydrochalcone                                 | [M+Cl] <sup>-</sup> | C20H22O4    | 361.12121               | 361.12124             | 0.1              | 3.7E+04     |
| 310 | Oleoyle glycine                                                              | [M+Na] <sup>+</sup> | C20H37NO3   | 362.26656               | 362.26700             | 1.2              | 1.5E+05     |
| 311 | MG(0:0/16:0/0:0)                                                             | [M+Cl] <sup>-</sup> | C19H38O4    | 365.24641               | 365.24677             | 1.0              | 5.1E+05     |
| 312 | N-Acetyl-6-O-L-fucosyl-D-glucosamine                                         | [M-H] <sup>-</sup>  | C14H25NO10  | 366.14057               | 366.13985             | -2.0             | 3.3E+04     |
| 313 | 1-pentyl-sn-glycero-3-phosphocholine                                         | [M+K] <sup>+</sup>  | C13H30NO6P  | 366.14423               | 366.14517             | 2.6              | 1.3E+05     |
| 314 | Steryl sulfate                                                               | [M+K] <sup>+</sup>  | C17H28O4S   | 367.13399               | 367.13504             | 2.9              | 2.7E+05     |
| 315 | trans-3-Hydroxycotinine glucuronide                                          | [M+H] <sup>+</sup>  | C16H20N2O8  | 369.12924               | 369.12981             | 1.5              | 1.4E+05     |
| 316 | 4'-O-Methylxanthohumol                                                       | [M+H] <sup>+</sup>  | C22H24O5    | 369.16965               | 369.16992             | 0.7              | 1.7E+05     |
| 317 | 12-Keto-leukotriene B4                                                       | [M+Cl] <sup>-</sup> | C20H30O4    | 369.18381               | 369.18434             | 1.4              | 4.9E+04     |
| 318 | Dihydroneopterin phosphate                                                   | [M+Cl] <sup>-</sup> | C9H14N5O7P  | 370.03249               | 370.03356             | 2.9              | 6.2E+04     |
| 319 | 7-O-Acetylsalutaridinol                                                      | [M-H] <sup>-</sup>  | C21H25NO5   | 370.16600               | 370.16694             | 2.6              | 1.4E+05     |
| 320 | (2S)-5,7,4'-Trihydroxy-3'-methoxy-6-(1,1-dimethylallyl)flavanone             | [M+H] <sup>+</sup>  | C21H22O6    | 371.14891               | 371.14951             | 1.6              | 3.1E+05     |
| 321 | Methyl-2-alpha-L-fucopyranosyl-beta-D-galactoside                            | [M+Cl] <sup>-</sup> | C13H24O10   | 375.10635               | 375.10726             | 2.4              | 3.8E+04     |
| 322 | 2',4'-Dihydroxy-6'-methoxy-3'-prenylchalcone                                 | [M+K] <sup>+</sup>  | C21H22O4    | 377.11497               | 377.11455             | -1.1             | 1.4E+05     |
| 323 | 3,6-Dimethoxy-19-norpregna-1,3,5,7,9-pentaen-20-one                          | [M+K] <sup>+</sup>  | C22H26O3    | 377.15135               | 377.15035             | -2.7             | 2.5E+05     |
| 324 | 5,7-Dihydroxyflavone 7-benzoate                                              | [M+Na] <sup>+</sup> | C22H14O5    | 381.07334               | 381.07419             | 2.2              | 3.1E+05     |
| 325 | 3-Oxopregn-4-ene-20beta-carboxaldehyde dioxime                               | [M+Na] <sup>+</sup> | C22H34N2O2  | 381.25125               | 381.25164             | 1.0              | 2.5E+05     |
| 326 | C17 Sphinganine-1-phosphate                                                  | [M+H] <sup>+</sup>  | C17H41N2O5P | 385.28259               | 385.28317             | 1.5              | 1.3E+05     |
| 327 | 5-Hydroxy-3',4'-methylenedioxy-6'',6''-dimethylpyrano[2'',3'':7,8]isoflavone | [M+Na] <sup>+</sup> | C21H16O6    | 387.08391               | 387.08355             | -0.9             | 2.7E+05     |
| 328 | N-Acetylmuramoyl-Ala                                                         | [M+Na] <sup>+</sup> | C14H24N2O9  | 387.13740               | 387.13689             | -1.3             | 4.5E+05     |
| 329 | 11,15,19-trimethyl-5Z,9Z,17Z-eicosatrienoic acid                             | [M+K] <sup>+</sup>  | C23H40O2    | 387.26599               | 387.26621             | 0.6              | 1.3E+05     |
| 330 | 6-Deoxyerythronolide                                                         | [M+H] <sup>+</sup>  | C21H38O6    | 387.27412               | 387.27387             | -0.6             | 1.4E+05     |
| 331 | Acetyl adenylate                                                             | [M-H] <sup>-</sup>  | C12H16N5O8P | 388.06637               | 388.06661             | 0.6              | 3.6E+04     |
| 332 | 12-oxo-20-dihydroxy-leukotriene B4                                           | [M+Na] <sup>+</sup> | C20H29O6    | 388.18563               | 388.18536             | -0.7             | 1.9E+05     |
| 333 | N-Acetylneuraminic acid 9-phosphate                                          | [M+H] <sup>+</sup>  | C11H20NO12P | 390.07959               | 390.07986             | 0.7              | 1.6E+05     |
| 334 | Rehmanioside A                                                               | [M+H] <sup>+</sup>  | C19H34O8    | 391.23264               | 391.23315             | 1.3              | 2.3E+05     |
| 335 | (22E)-3alpha,12alpha-Dihydroxy-5beta-chole-22-en-24-oic Acid                 | [M+H] <sup>+</sup>  | C24H38O4    | 391.28429               | 391.28491             | 1.6              | 9.8E+05     |
| 336 | N-stearoyl serine                                                            | [M+Na] <sup>+</sup> | C21H41NO4   | 394.29278               | 394.29383             | 2.7              | 1.4E+05     |
| 337 | (5E)-isovitamin D2                                                           | [M-H] <sup>-</sup>  | C28H44O     | 395.33194               | 395.33248             | 1.4              | 2.6E+04     |
| 338 | PC(4:0/4:0)                                                                  | [M-H] <sup>-</sup>  | C16H32NO8P  | 396.17928               | 396.17974             | 1.2              | 6.1E+04     |
| 339 | Tris(butoxyethyl)phosphate                                                   | [M-H] <sup>-</sup>  | C18H39O7P   | 397.23606               | 397.23678             | 1.8              | 2.5E+05     |



| #   | Putative Annotation (M) <sup>a</sup>                           | Ion     | Formula    | Theor. m/z <sup>b</sup> | Exp. m/z <sup>c</sup> | ppm <sup>d</sup> | Peak_Height |
|-----|----------------------------------------------------------------|---------|------------|-------------------------|-----------------------|------------------|-------------|
| 340 | 1'H-5alpha-Androst-2-eno[3,2-b]indol-17beta-ol                 | [M+Cl]- | C25H33NO   | 398.22562               | 398.22534             | -0.7             | 2.3E+05     |
| 341 | Bisphenol A dimethacrylate                                     | [M+Cl]- | C23H24O4   | 399.13686               | 399.13787             | 2.5              | 9.9E+04     |
| 342 | 16,16-dimethyl-PGA1                                            | [M+Cl]- | C22H36O4   | 399.23076               | 399.23120             | 1.1              | 5.8E+04     |
| 343 | 1-Arachidonoylglycerol                                         | [M+Na]+ | C23H38O4   | 401.26623               | 401.26539             | -2.1             | 1.6E+05     |
| 344 | trans-3-Hydroxycotinine glucuronide                            | [M+Cl]- | C16H20N2O8 | 403.09137               | 403.09189             | 1.3              | 1.1E+05     |
| 345 | 1-Hydroxy-2-(beta-D-glucosyloxy)-9,10-anthraquinone            | [M+H]+  | C20H18O9   | 403.10236               | 403.10190             | -1.1             | 2.3E+05     |
| 346 | (3'R,4'R)-3'-Epoxyangeloyloxy-4'-acetoxy-3',4'-dihydroseselin  | [M+H]+  | C21H22O8   | 403.13874               | 403.13865             | -0.2             | 2.1E+05     |
| 347 | 16Z-pentacosenoic acid                                         | [M+Na]+ | C25H48O2   | 403.35465               | 403.35453             | -0.3             | 2.6E+05     |
| 348 | N-palmitoyl phenylalanine                                      | [M+H]+  | C25H41NO3  | 404.31592               | 404.31712             | 3.0              | 1.6E+05     |
| 349 | Salicin 6-phosphate                                            | [M+K]+  | C13H19O10P | 405.03474               | 405.03494             | 0.5              | 1.4E+05     |
| 350 | 12a-Hydroxypachyrrhizone                                       | [M+Na]+ | C20H14O8   | 405.05809               | 405.05717             | -2.3             | 1.9E+05     |
| 351 | 1alpha,5alpha-Epithio-17a-oxa-D-homoandrostan-3,17-dione       | [M+K]+  | C19H26O3S2 | 405.09550               | 405.09605             | 1.4              | 1.9E+05     |
| 352 | Cinnassiol A                                                   | [M+Na]+ | C20H30O7   | 405.18837               | 405.18869             | 0.8              | 2.2E+05     |
| 353 | 1alpha,25-dihydroxy-21-nor-20-oxavitamin D3                    | [M+H]+  | C25H40O4   | 405.29994               | 405.29919             | -1.8             | 3.0E+05     |
| 354 | Leu-leu-tyr                                                    | [M+H]+  | C21H33N3O5 | 408.24930               | 408.24934             | 0.1              | 2.2E+05     |
| 355 | 3beta-(1-Pyrrolidinyl)-5alpha-pregnane-11,20-dione             | [M+Na]+ | C25H39NO2  | 408.28730               | 408.28694             | -0.9             | 3.9E+05     |
| 356 | 17-oxo-20Z-hexacosenoic acid                                   | [M+H]+  | C26H48O3   | 409.36762               | 409.36867             | 2.6              | 1.7E+05     |
| 357 | (22E)-3alpha,12alpha-Dihydroxy-5beta-chole-22-en-24-oic Acid   | [M+Na]+ | C24H38O4   | 413.26623               | 413.26744             | 2.9              | 4.7E+05     |
| 358 | PA(14:1(9Z)/0:0)                                               | [M+Cl]- | C17H33O7P  | 415.16579               | 415.16489             | -2.2             | 7.3E+04     |
| 359 | 5,3',4'-Trihydroxy-3,7-dimethoxy-6-prenylflavone               | [M+Na]+ | C22H22O7   | 421.12577               | 421.12580             | 0.1              | 1.5E+05     |
| 360 | 17-methyl-tetracosanoic acid                                   | [M+K]+  | C25H50O2   | 421.34424               | 421.34323             | -2.4             | 4.4E+05     |
| 361 | Quassin                                                        | [M+Cl]- | C22H28O6   | 423.15799               | 423.15791             | -0.2             | 1.1E+05     |
| 362 | Deoxygomisin A                                                 | [M+Na]+ | C23H28O6   | 423.17781               | 423.17872             | 2.2              | 1.6E+05     |
| 363 | Plakinamine A                                                  | [M+H]+  | C29H46N2   | 423.37338               | 423.37403             | 1.5              | 1.5E+05     |
| 364 | PC(O-6:0/O-6:0)                                                | [M-H]-  | C20H44NO6P | 424.28335               | 424.28293             | -1.0             | 1.3E+05     |
| 365 | 5,2',5'-Trihydroxy-3,7,8-trimethoxyflavone 2'-acetate          | [M+Na]+ | C20H18O9   | 425.08430               | 425.08443             | 0.3              | 1.9E+05     |
| 366 | Prostaglandin D2-1-glyceryl ester                              | [M-H]-  | C23H38O7   | 425.25448               | 425.25503             | 1.3              | 4.9E+05     |
| 367 | 5,12-Dihydroxanthommatin                                       | [M+H]+  | C20H15N3O8 | 426.09319               | 426.09352             | 0.8              | 1.6E+05     |
| 368 | PGF2alpha-dihydroxypropanylamine                               | [M-H]-  | C23H41NO6  | 426.28611               | 426.28616             | 0.1              | 3.0E+05     |
| 369 | PA(15:1(9Z)/0:0)                                               | [M+Cl]- | C18H35O7P  | 429.18144               | 429.18258             | 2.7              | 6.3E+04     |
| 370 | PA(18:4/0:0)                                                   | [M-H]-  | C21H35O7P  | 429.20476               | 429.20450             | -0.6             | 4.8E+04     |
| 371 | Diisooctyl phthalate                                           | [M+K]+  | C24H38O4   | 429.24017               | 429.24014             | -0.1             | 2.7E+06     |
| 372 | Dihydroxy-campestenone                                         | [M-H]-  | C28H48O3   | 431.35307               | 431.35285             | -0.5             | 3.5E+04     |
| 373 | 1-Benzyl-7,8-dimethoxy-3-phenyl-3H-pyrazolo[3,4-c]isoquinoline | [M+K]+  | C25H21N3O2 | 434.12654               | 434.12538             | -2.7             | 1.4E+05     |
| 374 | Varanic acid                                                   | [M-H]-  | C26H44O5   | 435.31160               | 435.31251             | 2.1              | 1.5E+05     |
| 375 | Stigmasterol                                                   | [M+Na]+ | C29H48O    | 435.35974               | 435.36103             | 3.0              | 2.1E+05     |
| 376 | N-(1-methyl-2-hydroxy-2-phenyl-ethyl) arachidonyl amine        | [M-H]-  | C29H43NO2  | 436.32210               | 436.32264             | 1.2              | 8.3E+04     |
| 377 | 4alpha-methyl-5alpha-cholestan-3beta-ol                        | [M+Cl]- | C28H50O    | 437.35557               | 437.35453             | -2.4             | 7.0E+04     |

| #   | Putative Annotation (M) <sup>a</sup>                                              | Ion                 | Formula      | Theor. <i>m/z</i> <sup>b</sup> | Exp. <i>m/z</i> <sup>c</sup> | ppm <sup>d</sup> | Peak_Height |
|-----|-----------------------------------------------------------------------------------|---------------------|--------------|--------------------------------|------------------------------|------------------|-------------|
| 378 | (17Z)-1alpha,25-dihydroxy-26,27-dimethyl-17,20,22,22,23,23-hexadehydrovitamin D3  | [M+H] <sup>+</sup>  | C29H42O3     | 439.32067                      | 439.32014                    | -1.2             | 1.4E+05     |
| 379 | N-(2-hydroxy-2S-methyl-ethyl)-16,16-dimethyl-5Z,8Z,11Z,14Z-docosatetraenoyl amine | [M+Na] <sup>+</sup> | C27H47NO2    | 440.34990                      | 440.35071                    | 1.8              | 1.5E+05     |
| 380 | N-linolenoyl-glutamine                                                            | [M+Cl] <sup>-</sup> | C23H38N2O4   | 441.25256                      | 441.25275                    | 0.4              | 3.7E+05     |
| 381 | Palmitoyl glucuronide                                                             | [M+Na] <sup>+</sup> | C22H42O7     | 441.28227                      | 441.28354                    | 2.9              | 2.2E+05     |
| 382 | (10E)-19-fluorovitamin D3 / (10E)-19-fluorocholecalciferol                        | [M+K] <sup>+</sup>  | C27H43FO     | 441.29295                      | 441.29322                    | 0.6              | 1.4E+05     |
| 383 | (20S)-20-cyclopropyl-1alpha,25-dihydroxy-16,17-didehydro-21-norvitamin D3         | [M+H] <sup>+</sup>  | C29H44O3     | 441.33632                      | 441.33651                    | 0.4              | 1.4E+05     |
| 384 | (-)-Epicatechin 3-O-gallate                                                       | [M+H] <sup>+</sup>  | C22H18O10    | 443.09727                      | 443.09716                    | -0.3             | 2.1E+05     |
| 385 | (23R)-23-Hydroxy-3,7-dioxo-5beta-cholan-24-oic Acid                               | [M+K] <sup>+</sup>  | C24H36O5     | 443.21943                      | 443.21882                    | -1.4             | 1.7E+05     |
| 386 | 1,25-Dihydroxyvitamin D3-26,23-lactone                                            | [M-H] <sup>-</sup>  | C27H40O5     | 443.28030                      | 443.28104                    | 1.7              | 6.3E+04     |
| 387 | 15alpha-hydroxycholestane                                                         | [M+K] <sup>+</sup>  | C27H48O2     | 443.32859                      | 443.32864                    | 0.1              | 2.0E+05     |
| 388 | Dihydrofolate                                                                     | [M+H] <sup>+</sup>  | C19H21N7O6   | 444.16261                      | 444.16301                    | 0.9              | 2.0E+05     |
| 389 | N-oleoyl glutamine                                                                | [M+Cl] <sup>-</sup> | C23H42N2O4   | 445.28386                      | 445.28476                    | 2.0              | 4.6E+04     |
| 390 | 19-(3-methyl-butanoyloxy)-villanovane-13alpha,17-diol                             | [M+Na] <sup>+</sup> | C25H42O5     | 445.29245                      | 445.29111                    | -3.0             | 1.8E+05     |
| 391 | 19Z-octacosenoic acid                                                             | [M+Na] <sup>+</sup> | C28H54O2     | 445.40160                      | 445.40120                    | -0.9             | 1.6E+05     |
| 392 | Kaempferol 3,7-di-O-sulfate                                                       | [M+H] <sup>+</sup>  | C15H10O12S2  | 446.96864                      | 446.96948                    | 1.9              | 1.4E+05     |
| 393 | 5,7,2',6'-Tetrahydroxyflavone 2'-O-glucoside                                      | [M-H] <sup>-</sup>  | C21H20O11    | 447.09328                      | 447.09309                    | -0.4             | 1.5E+05     |
| 394 | 4-epi-clavulone II                                                                | [M+H] <sup>+</sup>  | C25H34O7     | 447.23773                      | 447.23865                    | 2.1              | 1.7E+05     |
| 395 | 24-isopropenyl-22E-dehydrocholesterol                                             | [M+Na] <sup>+</sup> | C30H48O      | 447.35974                      | 447.36046                    | 1.6              | 2.2E+05     |
| 396 | 17beta-Estradiol 17-(beta-D-glucuronide)                                          | [M+H] <sup>+</sup>  | C24H31O8     | 448.20917                      | 448.20947                    | 0.7              | 1.5E+05     |
| 397 | 2-Geranyl-3,4,2',4'-tetrahydroxydihydrochalcone                                   | [M+K] <sup>+</sup>  | C25H30O5     | 449.17248                      | 449.17256                    | 0.2              | 2.3E+05     |
| 398 | 3alpha,12alpha,25-trihydroxy-5beta-cholestan-7-one                                | [M+H] <sup>+</sup>  | C28H48O4     | 449.36254                      | 449.36281                    | 0.6              | 2.9E+05     |
| 399 | 1alpha-fluoro-25-hydroxy-16,17,23,23,24,24-hexadehydrovitamin D3                  | [M+K] <sup>+</sup>  | C27H37FO2    | 451.24092                      | 451.24163                    | 1.6              | 1.7E+05     |
| 400 | 4,2'-Dihydroxy-4',6'-dimethoxychalcone 4-glucoside                                | [M+H] <sup>+</sup>  | C23H26O10    | 463.15987                      | 463.16107                    | 2.6              | 3.8E+05     |
| 401 | 17-[[3-(1-Pyrrolidinyl)propyl]imino]androst-5-en-3beta-ol acetate                 | [M+Na] <sup>+</sup> | C28H44N2O2   | 463.32950                      | 463.32963                    | 0.3              | 2.4E+05     |
| 402 | 1-tetradecanoyl-glycero-3-phosphoserine                                           | [M+H] <sup>+</sup>  | C20H40NO9P   | 470.25135                      | 470.25225                    | 1.9              | 1.9E+05     |
| 403 | 19-oxo-22Z-octacosenoic acid                                                      | [M+Cl] <sup>-</sup> | C28H52O3     | 471.36105                      | 471.36060                    | -1.0             | 5.9E+04     |
| 404 | 11-trans-LTE4; 5S-hydroxy-6R-(S-cysteinyl)-7E,9E,11E14Z-eicosatetraenoic acid     | [M+Cl] <sup>-</sup> | C23H37NO5S   | 474.20865                      | 474.20945                    | 1.7              | 1.1E+05     |
| 405 | Glucolimnanthin                                                                   | [M+K] <sup>+</sup>  | C15H20NO10S2 | 477.01602                      | 477.01518                    | -1.8             | 1.6E+05     |
| 406 | 5,7,2'-Trihydroxy-8-methoxyflavone 7-glucuronide                                  | [M+H] <sup>+</sup>  | C22H20O12    | 477.10275                      | 477.10200                    | -1.6             | 1.7E+05     |
| 407 | 1-(9Z-tetradecenoyl)-glycero-3-phospho-(1'-sn-glycerol)                           | [M+Na] <sup>+</sup> | C20H39O9P    | 477.22239                      | 477.22134                    | -2.2             | 2.0E+05     |
| 408 | 1-O-all-trans-retinoyl-beta-glucuronic acid                                       | [M+H] <sup>+</sup>  | C26H36O8     | 477.24829                      | 477.24778                    | -1.1             | 1.5E+05     |
| 409 | Parsonsine                                                                        | [M+K] <sup>+</sup>  | C23H37NO7    | 478.22016                      | 478.21962                    | -1.1             | 1.4E+05     |
| 410 | 3'-Geranyl-3,4,2',4'-tetrahydroxy-6'-methoxydihydrochalcone                       | [M+K] <sup>+</sup>  | C26H32O6     | 479.18305                      | 479.18325                    | 0.4              | 1.8E+05     |
| 411 | (24R)-24-Methylcycloarta-25-en-3-beta-ol                                          | [M+K] <sup>+</sup>  | C31H52O      | 479.36498                      | 479.36614                    | 2.4              | 1.8E+05     |

| #   | Putative Annotation (M) <sup>a</sup>                                                             | Ion                 | Formula      | Theor. m/z <sup>b</sup> | Exp. m/z <sup>c</sup> | ppm <sup>d</sup> | Peak_Height |
|-----|--------------------------------------------------------------------------------------------------|---------------------|--------------|-------------------------|-----------------------|------------------|-------------|
| 412 | 23Z-dotriacontenoic acid                                                                         | [M+H] <sup>+</sup>  | C32H62O2     | 479.48226               | 479.48095             | -2.7             | 1.6E+05     |
| 413 | N-Acetyl-leukotriene E4                                                                          | [M-H] <sup>-</sup>  | C25H39NO6S   | 480.24253               | 480.24266             | 0.3              | 1.6E+05     |
| 414 | 13'-hydroxy-alpha-tocopherol                                                                     | [M+Cl] <sup>-</sup> | C29H50O3     | 481.34540               | 481.34581             | 0.9              | 4.0E+04     |
| 415 | S-Decyl glutathione                                                                              | [M+Cl] <sup>-</sup> | C20H37N3O6S  | 482.20971               | 482.20932             | -0.8             | 1.8E+05     |
| 416 | Lankacidin C                                                                                     | [M+Na] <sup>+</sup> | C25H33NO7    | 482.21492               | 482.21616             | 2.6              | 2.0E+05     |
| 417 | 3,4,2',3',4',6',alpha-Heptahydroxychalcone 2'-glucoside                                          | [M+H] <sup>+</sup>  | C21H22O13    | 483.11332               | 483.11449             | 2.4              | 1.7E+05     |
| 418 | Doxycycline                                                                                      | [M+K] <sup>+</sup>  | C22H24N2O8   | 483.11643               | 483.11676             | 0.7              | 1.9E+05     |
| 419 | 11alpha-ethyl-1alpha,25-dihydroxyvitamin D3 / 11alpha-ethyl-1alpha,25-dihydroxycholecalciferol;  | [M+K] <sup>+</sup>  | C29H48O3     | 483.32350               | 483.32261             | -1.9             | 1.9E+05     |
| 420 | 17-hydroxyandrostane-3-glucuronide                                                               | [M+H] <sup>+</sup>  | C25H40O9     | 485.27451               | 485.27460             | 0.2              | 1.6E+05     |
| 421 | C17 sphingosine-1-phosphocholine                                                                 | [M+Cl] <sup>-</sup> | C22H47N2O5P  | 485.29166               | 485.29091             | -1.6             | 5.1E+04     |
| 422 | (22R)-1alpha,22,25-trihydroxy-26,27-dimethyl-23,23,24,24-tetradecahydro-24a,24b-dihomovitamin D3 | [M+H] <sup>+</sup>  | C31H48O4     | 485.36254               | 485.36237             | -0.3             | 2.3E+05     |
| 423 | (24R)-25-fluoro-1alpha,24-dihydroxy-24-methylvitamin D3                                          | [M+K] <sup>+</sup>  | C28H45FO3    | 487.29843               | 487.29815             | -0.6             | 3.2E+05     |
| 424 | 2-(8-[3]-ladderane-octanyl)-sn-glycero-3-phosphoethanolamine                                     | [M+H] <sup>+</sup>  | C25H46NO6P   | 488.31355               | 488.31357             | 0.0              | 3.9E+05     |
| 425 | Dotriacontanol                                                                                   | [M+Na] <sup>+</sup> | C32H66O      | 489.50059               | 489.50187             | 2.6              | 1.7E+05     |
| 426 | L-2-Amino adipate adenylate                                                                      | [M+H] <sup>+</sup>  | C16H23N6O10P | 491.12860               | 491.12717             | -2.9             | 1.7E+05     |
| 427 | 1'',2''-Dihydro-8-hydroxyisopentanyl-2'-methoxy-4'-O-methylalpinumisoflavone                     | [M+Na] <sup>+</sup> | C27H32O7     | 491.20402               | 491.20256             | -3.0             | 2.0E+05     |
| 428 | 1-hydroxy-2-hexadecanoyl-sn-glycero-3-phosphoethanolamine                                        | [M+K] <sup>+</sup>  | C21H44NO7P   | 492.24870               | 492.24787             | -1.7             | 2.0E+05     |
| 429 | Patuletin 3,3'-di-O-sulfate                                                                      | [M+H] <sup>+</sup>  | C16H12O14S2  | 492.97412               | 492.97300             | -2.3             | 1.5E+05     |
| 430 | Tetrahydrogeranylgeranyl diphosphate                                                             | [M+K] <sup>+</sup>  | C20H40O7P2   | 493.18809               | 493.18694             | -2.3             | 1.5E+05     |
| 431 | (24RS)-28,28,28-trifluoro-25-hydroxyvitamin D2                                                   | [M+K] <sup>+</sup>  | C28H41F3O2   | 505.26902               | 505.27023             | 2.4              | 1.7E+05     |
| 432 | Deoxyuridine triphosphate                                                                        | [M+K] <sup>+</sup>  | C9H15N2O14P3 | 506.93677               | 506.93551             | -2.5             | 1.5E+05     |
| 433 | (25S)-3-oxo-12beta-acetoxy-cholest-1,4-dien-26-oic acid                                          | [M+Na] <sup>+</sup> | C30H44O5     | 507.30810               | 507.30897             | 1.7              | 1.7E+05     |
| 434 | Luciferyl sulfate                                                                                | [M+Na] <sup>+</sup> | C26H21N3O5S  | 510.10941               | 510.11039             | 1.9              | 1.6E+05     |
| 435 | omega-Carboxy-N-acetyl-LTE4                                                                      | [M-H] <sup>-</sup>  | C25H37NO8S   | 510.21671               | 510.21611             | -1.2             | 7.0E+04     |
| 436 | PS(18:4/0:0)                                                                                     | [M-H] <sup>-</sup>  | C24H40NO9P   | 516.23679               | 516.23543             | -2.6             | 1.0E+05     |
| 437 | PA(20:4(5Z,8Z,11Z,14Z)e/2:0)                                                                     | [M+K] <sup>+</sup>  | C25H43O7P    | 525.23780               | 525.23773             | -0.1             | 1.8E+05     |
| 438 | 5,3',4'-Trihydroxy-7-methoxy-4-phenylcoumarin 5-O-(6''-acetyl)-galactoside                       | [M+Na] <sup>+</sup> | C24H24O12    | 527.11600               | 527.11560             | -0.8             | 1.7E+05     |
| 439 | Makisterone A                                                                                    | [M+Cl] <sup>-</sup> | C28H46O7     | 529.29376               | 529.29250             | -2.4             | 1.6E+05     |
| 440 | 1-tridecanoyl-sn-glycero-3-phospho-(1'-myo-inositol)                                             | [M+H] <sup>+</sup>  | C22H43O12P   | 531.25649               | 531.25510             | -2.6             | 3.2E+05     |
| 441 | 1-(9Z,12Z-octadecadienyl)-glycero-3-phospho-(1'-sn-glycerol)                                     | [M+Na] <sup>+</sup> | C24H45O9P    | 531.26934               | 531.27035             | 1.9              | 2.0E+05     |
| 442 | 2',4',6',3',4-Pentahydroxy-3'-geranyl-5-prenyldihydrochalcone                                    | [M+K] <sup>+</sup>  | C30H38O6     | 533.23000               | 533.23092             | 1.7              | 3.4E+05     |
| 443 | 5-O-(Indol-3-ylacetyl-myoinositol) D-galactoside                                                 | [M+Cl] <sup>-</sup> | C22H29NO12   | 534.13838               | 534.13813             | -0.5             | 5.1E+04     |
| 444 | (S)-N-[3-(3,4-Methylenedioxyphenyl)-2-(acetylthio)methyl-1-oxopropyl]-L-alanine benzyl ester     | [M+Cl] <sup>-</sup> | C25H28N2O7S  | 535.13112               | 535.13139             | 0.5              | 1.6E+05     |

| #   | Putative Annotation (M) <sup>a</sup>                               | Ion                 | Formula        | Theor. m/z <sup>b</sup> | Exp. m/z <sup>c</sup> | ppm <sup>d</sup> | Peak_Height |
|-----|--------------------------------------------------------------------|---------------------|----------------|-------------------------|-----------------------|------------------|-------------|
| 445 | Lipoxin D4                                                         | [M+Na] <sup>+</sup> | C25H40N2O7S    | 535.24484               | 535.24641             | 2.9              | 2.0E+05     |
| 446 | Neurosporaxanthin                                                  | [M+K] <sup>+</sup>  | C35H46O2       | 537.31294               | 537.31150             | -2.7             | 2.8E+05     |
| 447 | 1-(9Z-tetradecenoyl)-2-(9Z-hexadecenoyl)-sn-glycerol               | [M+H] <sup>+</sup>  | C33H60O5       | 537.45135               | 537.45235             | 1.9              | 1.8E+05     |
| 448 | Thiamin triphosphate                                               | [M+Cl] <sup>-</sup> | C12H20N4O10P3S | 539.98070               | 539.98128             | 1.1              | 5.6E+04     |
| 449 | Chitotriose                                                        | [M+K] <sup>+</sup>  | C18H35N3O13    | 540.18015               | 540.18092             | 1.4              | 2.6E+05     |
| 450 | 10-Deoxygeniposide tetraacetate                                    | [M+H] <sup>+</sup>  | C25H32O13      | 541.19157               | 541.19067             | -1.7             | 2.2E+05     |
| 451 | 1-(1Z,12Z-nonadecadienyl)-sn-glycero-3-phosphocholine              | [M+Na] <sup>+</sup> | C27H54NO6P     | 542.35810               | 542.35693             | -2.1             | 2.9E+05     |
| 452 | dolichyl diphosphate                                               | [M+Na] <sup>+</sup> | C25H46O7P2     | 543.26110               | 543.25991             | -2.2             | 8.3E+05     |
| 453 | Thiamin triphosphate                                               | [M+K] <sup>+</sup>  | C12H20N4O10P3S | 543.97446               | 543.97521             | 1.4              | 4.4E+05     |
| 454 | 2-deoxy-20-hydroxyecdysone 22-phosphate                            | [M+H] <sup>+</sup>  | C27H45O9P      | 545.28740               | 545.28713             | -0.5             | 6.0E+05     |
| 455 | 1-(9Z,12Z-heptadecadienyl)-glycero-3-phosphoserine                 | [M+K] <sup>+</sup>  | C23H42NO9P     | 546.22288               | 546.22197             | -1.7             | 3.2E+05     |
| 456 | (24R)-11alpha,20,24-trihydroxyecdysone                             | [M+Cl] <sup>-</sup> | C27H44O9       | 547.26793               | 547.26777             | -0.3             | 9.1E+04     |
| 457 | Hydroxyphthioceranic acid (C36)                                    | [M-H] <sup>-</sup>  | C36H72O3       | 551.54087               | 551.54008             | -1.4             | 1.0E+05     |
| 458 | (D-Ala(2)-mephe(4)-gly-ol(5))enkephalin                            | [M+K] <sup>+</sup>  | C26H35N5O6     | 552.22189               | 552.22332             | 2.6              | 1.8E+05     |
| 459 | 2-Aminoethylphosphocholate                                         | [M+K] <sup>+</sup>  | C26H46NO7P     | 554.26435               | 554.26408             | -0.5             | 2.0E+05     |
| 460 | PG(P-20:0/0:0)                                                     | [M+Cl] <sup>-</sup> | C26H53O8P      | 559.31721               | 559.31560             | -2.9             | 7.6E+04     |
| 461 | Cholesterol glucuronide                                            | [M+H] <sup>+</sup>  | C33H54O7       | 563.39423               | 563.39365             | -1.0             | 2.1E+05     |
| 462 | PI(16:1/0:0)                                                       | [M-H] <sup>-</sup>  | C25H47O12P     | 569.27324               | 569.27401             | 1.4              | 4.0E+04     |
| 463 | 5,4'-Dihydroxy-7,8,2',3'-tetramethoxy flavone 5-glucoside          | [M+Cl] <sup>-</sup> | C25H28O13      | 571.12239               | 571.12368             | 2.3              | 5.0E+04     |
| 464 | 6,7,3',4'-Tetrahydroxyaurone 6-(2'',4'',6''-triacetylglucoside)    | [M+H] <sup>+</sup>  | C27H26O14      | 575.13953               | 575.13913             | -0.7             | 2.2E+05     |
| 465 | Coroglaucigenin-3-o-alpha-L-rhamnopyranoside                       | [M+K] <sup>+</sup>  | C29H44O9       | 575.26169               | 575.26270             | 1.8              | 3.4E+05     |
| 466 | Tetrahydroxy-4-phenylcoumarin 5-O-apiosyl-(1->6)-glucoside         | [M-H] <sup>-</sup>  | C26H28O15      | 579.13554               | 579.13396             | -2.7             | 4.8E+04     |
| 467 | Formamidopyrimidine nucleoside triphosphate                        | [M+K] <sup>+</sup>  | C10H18N5O15P3  | 579.96438               | 579.96443             | 0.1              | 1.9E+05     |
| 468 | PS(20:3/0:0)                                                       | [M+Cl] <sup>-</sup> | C26H46NO9P     | 582.26042               | 582.26144             | 1.8              | 1.4E+05     |
| 469 | (3Z)-Phycocyanobilin                                               | [M-H] <sup>-</sup>  | C33H38N4O6     | 585.27186               | 585.27279             | 1.6              | 6.0E+04     |
| 470 | Cholic acid glucuronide                                            | [M+H] <sup>+</sup>  | C30H48O11      | 585.32694               | 585.32561             | -2.3             | 2.3E+05     |
| 471 | DG(P-14:0/18:1)                                                    | [M+Cl] <sup>-</sup> | C35H66O4       | 585.46551               | 585.46709             | 2.7              | 8.9E+04     |
| 472 | 3-O-acetylcyclohexane 2-phosphate                                  | [M+H] <sup>+</sup>  | C29H47O10P     | 587.29796               | 587.29773             | -0.4             | 2.1E+05     |
| 473 | Catechin 3,7,-di-O-galate                                          | [M-H] <sup>-</sup>  | C29H22O14      | 593.09368               | 593.09492             | 2.1              | 7.9E+04     |
| 474 | 1-heneicosanoyl-glycero-3-phospho-(1'-sn-glycerol)                 | [M+K] <sup>+</sup>  | C27H55O9P      | 593.32153               | 593.32059             | -1.6             | 2.3E+05     |
| 475 | 5-O-beta-D-Mycaminosyltylonolide                                   | [M-H] <sup>-</sup>  | C31H51NO10     | 596.34402               | 596.34530             | 2.2              | 9.7E+04     |
| 476 | N-Acetyl-leu-leu-leu-tyr-amide                                     | [M+K] <sup>+</sup>  | C29H47N5O6     | 600.31579               | 600.31738             | 2.6              | 2.2E+05     |
| 477 | dolichyl beta-D-glucosyl phosphate                                 | [M-H] <sup>-</sup>  | C31H55O9P      | 601.35109               | 601.35183             | 1.2              | 4.9E+04     |
| 478 | Cyanidin 3-(2''-galloyl)galactoside)                               | [M+H] <sup>+</sup>  | C28H25O15      | 602.12662               | 602.12723             | 1.0              | 1.9E+05     |
| 479 | 5,7,3'-Trihydroxy-6,8,4'-trimethoxyflavone 5-(6''-acetylglucoside) | [M+K] <sup>+</sup>  | C26H28O14      | 603.11107               | 603.11124             | 0.3              | 2.5E+05     |
| 480 | PS(22:4(7Z,10Z,13Z,16Z)/0:0)                                       | [M+Cl] <sup>-</sup> | C28H48NO9P     | 608.27607               | 608.27778             | 2.8              | 1.6E+05     |
| 481 | Tetraacetoxy-cholest-5-en-3alpha-ol                                | [M-H] <sup>-</sup>  | C35H54O9       | 617.36951               | 617.37059             | 1.8              | 1.5E+05     |
| 482 | 1-hexadecanoyl-2-valeryl-sn-glycero-3-phosphocholine               | [M+K] <sup>+</sup>  | C29H58NO8P     | 618.35316               | 618.35255             | -1.0             | 4.1E+05     |

| #   | Putative Annotation (M) <sup>a</sup>                                                             | Ion     | Formula       | Theor. <i>m/z</i> <sup>b</sup> | Exp. <i>m/z</i> <sup>c</sup> | ppm <sup>d</sup> | Peak_Height |
|-----|--------------------------------------------------------------------------------------------------|---------|---------------|--------------------------------|------------------------------|------------------|-------------|
| 483 | 1-(6-[5]-ladderane-hexanoyl)-2-(8-[3]-ladderane-octanyl)-sn-glycerol                             | [M-H]-  | C41H64O4      | 619.47318                      | 619.47418                    | 1.6              | 4.0E+04     |
| 484 | Bacteriorubuxanthin                                                                              | [M+K]+  | C41H58O2      | 621.40684                      | 621.40807                    | 2.0              | 1.8E+05     |
| 485 | Adenosine tetraphosphate                                                                         | [M+Cl]- | C10H17N5O16P4 | 621.93148                      | 621.93246                    | 1.6              | 6.3E+04     |
| 486 | Cer(d18:0/22:0)                                                                                  | [M+H]+  | C40H81NO3     | 624.62892                      | 624.62879                    | -0.2             | 2.1E+05     |
| 487 | 1-heptadecanoyl-glycero-3-phospho-(1'-myo-inositol)                                              | [M+K]+  | C26H51O12P    | 625.27497                      | 625.27378                    | -1.9             | 3.2E+05     |
| 488 | Delphinidin 3-O-(6-caffeoyl-beta-D-glucoside)                                                    | [M+H]+  | C30H27O15     | 628.14227                      | 628.14271                    | 0.7              | 2.1E+05     |
| 489 | Kaempferol 3-(3"-acetyl-alpha-L-arabinofuranoside)-7-rhamnoside                                  | [M+Na]+ | C28H30O15     | 629.14769                      | 629.14780                    | 0.2              | 2.8E+05     |
| 490 | 7"-O-Phosphohygroscopicin                                                                        | [M+Na]+ | C20H38N3O16P  | 630.18819                      | 630.18727                    | -1.5             | 1.9E+05     |
| 491 | PI(18:1(9Z)/0:0)                                                                                 | [M+Cl]- | C27H51O12P    | 633.28122                      | 633.28053                    | -1.1             | 1.0E+05     |
| 492 | PS(13:0/12:0)                                                                                    | [M-H]-  | C31H60NO10P   | 636.38821                      | 636.38860                    | 0.6              | 3.6E+04     |
| 493 | 1-dodecanoyl-2-(9Z-tetradecenoyl)-glycero-3-phospho-(1'-sn-glycerol)                             | [M+H]+  | C32H61O10P    | 637.40751                      | 637.40684                    | -1.1             | 2.3E+05     |
| 494 | 1-dodecanoyl-2-(9Z,12Z-heptadecadienoyl)-glycero-3-phosphoethanolamine                           | [M+H]+  | C34H64NO8P    | 646.44423                      | 646.44593                    | 2.6              | 1.7E+05     |
| 495 | 2-Octaprenyl-6-hydroxyphenol                                                                     | [M-H]-  | C46H70O2      | 653.53031                      | 653.53184                    | 2.4              | 4.9E+04     |
| 496 | Z-Arg-Arg-NHMec                                                                                  | [M+Cl]- | C30H39N9O6    | 656.27173                      | 656.27151                    | -0.3             | 1.2E+05     |
| 497 | 1-dodecanoyl-2-nonadecanoyl-glycero-3-phosphate                                                  | [M+Na]+ | C34H67O8P     | 657.44658                      | 657.44603                    | -0.8             | 2.0E+05     |
| 498 | Neocarzinostatin chromophore                                                                     | [M-H]-  | C35H33NO12    | 658.19300                      | 658.19228                    | -1.1             | 3.9E+04     |
| 499 | Delphinidin 3-glucoside-5-(6-acetylglucoside)                                                    | [M+H]+  | C29H33O18     | 670.17397                      | 670.17342                    | -0.8             | 2.2E+05     |
| 500 | bacteriohopane-32,33-diol-34,35-dicarbamate                                                      | [M+K]+  | C37H64N2O6    | 671.43960                      | 671.43808                    | -2.3             | 2.0E+05     |
| 501 | 1-(6Z,9Z,12Z,15Z-octadecatetraenoyl)-2-(5Z,8Z,11Z,14Z,17Z-eicosapentaenoyl)-sn-glycerol          | [M+K]+  | C41H62O5      | 673.42288                      | 673.42448                    | 2.4              | 2.4E+05     |
| 502 | 1-tetradecanoyl-2-(1-enyl-1Z,11Z-octadecadienoyl)-sn-glycero-3-phosphoethanolamine               | [M+H]+  | C37H72NO7P    | 674.51192                      | 674.51040                    | -2.2             | 2.8E+05     |
| 503 | 1-tridecanoyl-2-(5Z,8Z,11Z,14Z-eicosatetraenoyl)-glycero-3-phosphate                             | [M+Na]+ | C36H63O8P     | 677.41528                      | 677.41548                    | 0.3              | 3.8E+05     |
| 504 | PA(15:0/20:5)                                                                                    | [M-H]-  | C38H65O8P     | 679.43443                      | 679.43522                    | 1.2              | 7.4E+04     |
| 505 | Cer(d18:0/26:0)                                                                                  | [M+H]+  | C44H89NO3     | 680.69152                      | 680.69101                    | -0.8             | 2.6E+05     |
| 506 | Noranhydrocaritin 3-rhamnosyl-(1->2)-rhamnoside                                                  | [M+K]+  | C32H38O14     | 685.18932                      | 685.18970                    | 0.6              | 2.7E+05     |
| 507 | 1-(8-[3]-ladderane-octanoyl)-2-(8-[3]-ladderane-octanyl)-sn-glycerol                             | [M+Cl]- | C43H70O4      | 685.49681                      | 685.49531                    | -2.2             | 4.2E+04     |
| 508 | 1-dodecanoyl-2-(7Z,10Z,13Z,16Z-docosatetraenoyl)-glycero-3-phosphate                             | [M+Na]+ | C37H65O8P     | 691.43093                      | 691.43019                    | -1.1             | 3.4E+05     |
| 509 | DG(17:0/22:5)/0:0)                                                                               | [M+Cl]- | C42H72O5      | 691.50738                      | 691.50815                    | 1.1              | 1.6E+05     |
| 510 | 2-Octaprenyl-6-methoxyphenol                                                                     | [M+Na]+ | C47H72O2      | 691.54245                      | 691.54215                    | -0.4             | 2.5E+05     |
| 511 | 1-tetradecanoyl-2-(4Z,7Z,10Z,13Z,16Z,19Z-docosahexaenoyl)-glycero-3-phosphate                    | [M+H]+  | C39H65O8P     | 693.44898                      | 693.45027                    | 1.9              | 3.7E+05     |
| 512 | 1-docosanoyl-glycero-3-phospho-(1'-myo-inositol)                                                 | [M+K]+  | C31H61O12P    | 695.35322                      | 695.35302                    | -0.3             | 3.0E+05     |
| 513 | 1,2-di(9Z-tetradecenoyl)-rac-glycero-3-phosphoserine                                             | [M+Na]+ | C34H62NO10P   | 698.40035                      | 698.40146                    | 1.6              | 3.4E+05     |
| 514 | 1-(1Z-hexadecenyl)-2-tridecanoyl-glycero-3-phosphoserine [1Z-alkenyl,2-acylglycerophosphoserines | [M+Na]+ | C35H68NO9P    | 700.45239                      | 700.45240                    | 0.0              | 3.6E+05     |

| #   | Putative Annotation (M) <sup>a</sup>                                                          | Ion                 | Formula       | Theor. m/z <sup>b</sup> | Exp. m/z <sup>c</sup> | ppm <sup>d</sup> | Peak_Height |
|-----|-----------------------------------------------------------------------------------------------|---------------------|---------------|-------------------------|-----------------------|------------------|-------------|
| 515 | 1-pentadecanoyl-2-(5Z,8Z,11Z,14Z,17Z-eicosapentaenoyl)-glycero-3-phosphate                    | [M+Na] <sup>+</sup> | C38H65O8P     | 703.43093               | 703.43133             | 0.6              | 2.8E+05     |
| 516 | PA(15:1/22:6)                                                                                 | [M-H] <sup>-</sup>  | C40H65O8P     | 703.43443               | 703.43466             | 0.3              | 2.2E+05     |
| 517 | 1-tridecanoyl-2-(6Z,9Z,12Z-octadecatrienoyl)-glycero-3-phospho-(1'-sn-glycerol)               | [M+H] <sup>+</sup>  | C37H67O10P    | 703.45446               | 703.45591             | 2.1              | 4.7E+05     |
| 518 | Limocitrin 3,7-diglucoside                                                                    | [M+Cl] <sup>-</sup> | C29H34O18     | 705.14392               | 705.14492             | 1.4              | 1.8E+05     |
| 519 | Guanosine 3'-diphosphate 5'-triphosphate                                                      | [M+Na] <sup>+</sup> | C10H18N5O20P5 | 705.91254               | 705.91436             | 2.6              | 4.5E+05     |
| 520 | 1-dodecanoyl-2-(5Z,8Z,11Z,14Z-eicosatetraenoyl)-glycero-3-phosphoethanolamine                 | [M+Na] <sup>+</sup> | C37H66NO8P    | 706.44183               | 706.44234             | 0.7              | 4.9E+05     |
| 521 | 1-dodecanoyl-2-(4Z,7Z,10Z,13Z,16Z,19Z-docosahexaenoyl)-glycero-3-phosphoethanolamine          | [M+H] <sup>+</sup>  | C39H66NO8P    | 708.45988               | 708.46077             | 1.3              | 2.8E+05     |
| 522 | 2,3-Bis(3-hydroxytetradecanoyl)-beta-D-glucosaminyl 1-phosphate                               | [M+H] <sup>+</sup>  | C34H66NO12P   | 712.43954               | 712.43999             | 0.6              | 4.5E+05     |
| 523 | 1-tridecanoyl-2-docosanoyl-glycero-3-phosphate                                                | [M+Na] <sup>+</sup> | C38H75O8P     | 713.50918               | 713.50926             | 0.1              | 2.3E+05     |
| 524 | 1-(6Z,9Z,12Z,15Z-octadecatetraenoyl)-2-(1-enyl-hexadecenoyl)-sn-glycero-3-phosphoethanolamine | [M+Na] <sup>+</sup> | C39H70NO7P    | 718.47821               | 718.47763             | -0.8             | 4.3E+05     |
| 525 | 1-pentadecanoyl-2-(8Z,11Z,14Z-eicosatrienoyl)-glycero-3-phosphate                             | [M+K] <sup>+</sup>  | C38H69O8P     | 723.43617               | 723.43573             | -0.6             | 3.8E+05     |
| 526 | 1-(9Z,12Z-octadecadienoyl)-2-(15Z-tetracosanoyl)-sn-glycerol                                  | [M+Na] <sup>+</sup> | C45H82O5      | 725.60545               | 725.60670             | 1.7              | 2.3E+05     |
| 527 | Alpha-Tetrasaccharide                                                                         | [M+Cl] <sup>-</sup> | C26H45NO20    | 726.22289               | 726.22309             | 0.3              | 3.1E+04     |
| 528 | 1-dodecanoyl-2-(9Z-heptadecenoyl)-glycero-3-phosphoserine                                     | [M+K] <sup>+</sup>  | C35H66NO10P   | 730.40559               | 730.40362             | -2.7             | 5.3E+05     |
| 529 | 1-octadecyl-2-(5Z,8Z,11Z,14Z,17Z-eicosapentaenoyl)-glycero-3-phosphate                        | [M+Na] <sup>+</sup> | C41H73O7P     | 731.49861               | 731.49905             | 0.6              | 4.6E+05     |
| 530 | PS(12:0/20:1)                                                                                 | [M-H] <sup>-</sup>  | C38H72NO10P   | 732.48211               | 732.48394             | 2.5              | 4.2E+04     |
| 531 | Pentacarboxylporphyrin I                                                                      | [M+Cl] <sup>-</sup> | C37H38N4O10   | 733.22820               | 733.22695             | -1.7             | 3.3E+04     |
| 532 | N-(heptadecanoyl)-sphing-4-enine-1-phosphocholine                                             | [M+Na] <sup>+</sup> | C40H81N2O6P   | 739.57245               | 739.57466             | 3.0              | 2.3E+05     |
| 533 | 1-(1Z-hexadecenyl)-2-(9Z-hexadecenoyl)-glycero-3-phosphoserine                                | [M+Na] <sup>+</sup> | C38H72NO9P    | 740.48369               | 740.48468             | 1.3              | 5.6E+05     |
| 534 | PS(12:0/18:0)                                                                                 | [M+Cl] <sup>-</sup> | C36H70NO10P   | 742.44314               | 742.44228             | -1.2             | 9.2E+04     |
| 535 | 1-tetradecanoyl-2-docosanoyl-glycero-3-phosphate                                              | [M+K] <sup>+</sup>  | C39H77O8P     | 743.49877               | 743.49809             | -0.9             | 5.6E+05     |
| 536 | 1-tridecanoyl-2-(5Z,8Z,11Z,14Z,17Z-eicosapentaenoyl)-glycero-3-phospho-(1'-sn-glycerol)       | [M+Na] <sup>+</sup> | C39H67O10P    | 749.43641               | 749.43745             | 1.4              | 2.5E+05     |
| 537 | 1,2-di(4Z,7Z,10Z,13Z,16Z,19Z-docosahexaenoyl)-rac-glycerol                                    | [M+K] <sup>+</sup>  | C47H68O5      | 751.46983               | 751.47144             | 2.1              | 6.0E+05     |
| 538 | PA(16:0/22:6)                                                                                 | [M+Cl] <sup>-</sup> | C41H69O8P     | 755.44241               | 755.44451             | 2.8              | 3.5E+04     |
| 539 | 1-dodecanoyl-2-(11Z-eicosenoyl)-glycero-3-phosphoserine                                       | [M+Na] <sup>+</sup> | C38H72NO10P   | 756.47860               | 756.47869             | 0.1              | 3.8E+05     |
| 540 | 1-(10Z,13Z,16Z-docosatrienoyl)-2-(4Z,7Z,10Z,13Z,16Z,19Z-docosahexaenoyl)-sn-glycerol          | [M+K] <sup>+</sup>  | C47H74O5      | 757.51678               | 757.51806             | 1.7              | 4.6E+05     |
| 541 | Oceanalin A                                                                                   | [M+Na] <sup>+</sup> | C41H72N2O9    | 759.51300               | 759.51308             | 0.1              | 6.1E+05     |
| 542 | (3R,2'S)-Myxol 2'-(2,4-di-O-methyl-alpha-L-fucoside)                                          | [M+H] <sup>+</sup>  | C48H70O7      | 759.51943               | 759.52111             | 2.2              | 3.6E+05     |
| 543 | Quercetin 3-(2"-galoylrutinoside)                                                             | [M-H] <sup>-</sup>  | C34H34O20     | 761.15707               | 761.15744             | 0.5              | 6.0E+04     |

| #   | Putative Annotation (M) <sup>a</sup>                                                              | Ion                 | Formula     | Theor. <i>m/z</i> <sup>b</sup> | Exp. <i>m/z</i> <sup>c</sup> | ppm <sup>d</sup> | Peak_Height |
|-----|---------------------------------------------------------------------------------------------------|---------------------|-------------|--------------------------------|------------------------------|------------------|-------------|
| 544 | 1-(6-[5]-ladderane-hexanyl)-2-(8-[3]-ladderane-octanyl)-sn-glycero-3-phospho-(1'-sn-glycerol)     | [M+H] <sup>+</sup>  | C44H73O8P   | 761.51158                      | 761.51330                    | 2.3              | 7.3E+05     |
| 545 | 1-(6Z,9Z,12Z-octadecatrienoyl)-2-(1-enyl-1Z,11Z-octadecadienoyl)-sn-glycero-3-phosphoethanolamine | [M+K] <sup>+</sup>  | C41H74NO7P  | 762.48345                      | 762.48488                    | 1.9              | 3.2E+05     |
| 546 | CerP(d18:1/24:1)                                                                                  | [M+Cl] <sup>-</sup> | C42H82NO6P  | 762.55738                      | 762.55560                    | -2.3             | 1.7E+05     |
| 547 | PI(12:0/17:2)                                                                                     | [M-H] <sup>-</sup>  | C38H69O13P  | 763.44030                      | 763.43961                    | -0.9             | 4.5E+05     |
| 548 | 1-hexadecanoyl-2-(7Z,10Z,13Z,16Z-docosatetraenoyl)-glycero-3-phosphate                            | [M+K] <sup>+</sup>  | C41H73O8P   | 763.46747                      | 763.46564                    | -2.4             | 9.1E+05     |
| 549 | 1,2-di-(3Z,6Z,9Z,12Z,15Z-octadecapentaenoyl)-3-O-beta-D-galactosyl-sn-glycerol                    | [M+H] <sup>+</sup>  | C45H66O10   | 767.47287                      | 767.47413                    | 1.6              | 3.7E+05     |
| 550 | PA(P-18:0/22:6)                                                                                   | [M+Cl] <sup>-</sup> | C43H73O7P   | 767.47879                      | 767.48054                    | 2.3              | 1.1E+05     |
| 551 | 1-tetradecanoyl-2-(8Z,11Z,14Z-eicosatrienoyl)-glycero-3-phospho-(1'-sn-glycerol)                  | [M+Na] <sup>+</sup> | C40H73O10P  | 767.48336                      | 767.48482                    | 1.9              | 2.6E+05     |
| 552 | PC(O-16:0/17:0)                                                                                   | [M+Cl] <sup>-</sup> | C41H84NO7P  | 768.56794                      | 768.56581                    | -2.8             | 4.5E+04     |
| 553 | (3R,2'S)-Myxol 2'-alpha-L-fucoside                                                                | [M+K] <sup>+</sup>  | C46H66O7    | 769.44401                      | 769.44560                    | 2.1              | 2.8E+05     |
| 554 | 1-hexadecyl-2-(9Z-octadecenoyl)-glycero-3-phosphoserine [1-alkyl,2-acylglycerophosphoserines      | [M+Na] <sup>+</sup> | C40H78NO9P  | 770.53064                      | 770.53258                    | 2.5              | 2.3E+05     |
| 555 | Leucomycin A5                                                                                     | [M+H] <sup>+</sup>  | C39H65NO14  | 772.44778                      | 772.44650                    | -1.7             | 2.2E+05     |
| 556 | 1-(8-[5]-ladderane-octanoyl)-2-(8-[3]-ladderane-octanyl)-sn-glycerophosphoethanolamine            | [M+H] <sup>+</sup>  | C45H74NO7P  | 772.52757                      | 772.52870                    | 1.5              | 4.7E+05     |
| 557 | 1-dodecanoyl-2-(7Z,10Z,13Z,16Z-docosatetraenoyl)-glycero-3-phosphocholine                         | [M+Na] <sup>+</sup> | C42H76NO8P  | 776.52008                      | 776.52107                    | 1.3              | 5.0E+05     |
| 558 | 1-(6-[3]-ladderane-hexanoyl)-2-(8-[3]-ladderane-octanyl)-sn-glycero-3-phospho-(1'-sn-glycerol)    | [M+H] <sup>+</sup>  | C44H73O9P   | 777.50650                      | 777.50675                    | 0.3              | 4.0E+05     |
| 559 | 5,7,3'-Trihydroxy-4'-methoxyflavanone 7-(2,6-dirhamnosylglucoside)                                | [M+Na] <sup>+</sup> | C34H44O19   | 779.23690                      | 779.23481                    | -2.7             | 2.1E+05     |
| 560 | 3-O-Sulfogalactosylceramide (d18:1/16:0)                                                          | [M+H] <sup>+</sup>  | C40H77NO11S | 780.52901                      | 780.52703                    | -2.5             | 2.4E+05     |
| 561 | PG(15:1(9Z)/22:2)                                                                                 | [M-H] <sup>-</sup>  | C43H79O10P  | 785.53381                      | 785.53215                    | -2.1             | 7.6E+04     |
| 562 | 1-tridecanoyl-2-(4Z,7Z,10Z,13Z,16Z,19Z-docosahexaenoyl)-glycero-3-phosphocholine                  | [M+Na] <sup>+</sup> | C43H74NO8P  | 786.50443                      | 786.50641                    | 2.5              | 4.9E+05     |
| 563 | 1-(6-[3]-ladderane-hexanoyl)-2-(8-[3]-ladderane-octanyl)-sn-glycerophosphocholine                 | [M+H] <sup>+</sup>  | C46H78NO7P  | 788.55887                      | 788.55785                    | -1.3             | 2.1E+05     |
| 564 | 1-(9Z-octadecenoyl)-2-(7Z,10Z,13Z,16Z-docosatetraenoyl)-glycero-3-phosphate                       | [M+K] <sup>+</sup>  | C43H75O8P   | 789.48312                      | 789.48469                    | 2.0              | 2.7E+05     |
| 565 | 1-(9Z-octadecenoyl)-2-(13Z,16Z-docosadienoyl)-glycero-3-phosphate                                 | [M+K] <sup>+</sup>  | C43H79O8P   | 793.51442                      | 793.51268                    | -2.2             | 8.7E+05     |
| 566 | PA(22:2/22:6)                                                                                     | [M-H] <sup>-</sup>  | C47H77O8P   | 799.52833                      | 799.52875                    | 0.5              | 7.7E+04     |
| 567 | N-(docosanoyl)-hexadecasphinganine-1-phosphocholine                                               | [M+K] <sup>+</sup>  | C43H89N2O6P | 799.60898                      | 799.60955                    | 0.7              | 4.0E+05     |
| 568 | 1-(11Z-eicosenoyl)-2-(7Z,10Z,13Z,16Z-docosatetraenoyl)-glycero-3-phosphate                        | [M+Na] <sup>+</sup> | C45H79O8P   | 801.54048                      | 801.53905                    | -1.8             | 5.0E+05     |

| #   | Putative Annotation (M) <sup>a</sup>                                                                 | Ion                 | Formula       | Theor. <i>m/z</i> <sup>b</sup> | Exp. <i>m/z</i> <sup>c</sup> | ppm <sup>d</sup> | Peak_Height |
|-----|------------------------------------------------------------------------------------------------------|---------------------|---------------|--------------------------------|------------------------------|------------------|-------------|
| 569 | 1-hexadecyl-2-(4Z,7Z,10Z,13Z,16Z,19Z-docosahexaenoyl)-glycero-3-phospho-(1'-sn-glycerol)             | [M+Na] <sup>+</sup> | C44H77O9P     | 803.51974                      | 803.52040                    | 0.8              | 4.1E+05     |
| 570 | 1-(1Z-hexadecenyl)-2-(9Z,12Z-heptadecadienoyl)-glycero-3-phospho-(1'-myo-inositol)                   | [M+H] <sup>+</sup>  | C42H77O12P    | 805.52254                      | 805.52485                    | 2.9              | 3.3E+05     |
| 571 | 1-octadecanoyl-2-(12S-hydroxy-5Z,8Z,10E,14Z-eicosatetraenoyl)-sn-glycero-3-phosphoethanolamine       | [M+Na] <sup>+</sup> | C43H78NO9P    | 806.53064                      | 806.53282                    | 2.7              | 6.3E+05     |
| 572 | 1-pentadecanoyl-2-(7Z,10Z,13Z,16Z-docosatetraenoyl)-glycero-3-phospho-(1'-sn-glycerol)               | [M+Na] <sup>+</sup> | C43H77O10P    | 807.51466                      | 807.51416                    | -0.6             | 8.5E+05     |
| 573 | PG(P-20:0/17:2)                                                                                      | [M+Cl] <sup>-</sup> | C43H81O9P     | 807.53122                      | 807.53130                    | 0.1              | 1.1E+05     |
| 574 | FAD                                                                                                  | [M+Na] <sup>+</sup> | C27H33N9O15P2 | 808.14636                      | 808.14464                    | -2.1             | 2.2E+05     |
| 575 | 1-(2E,6E-phytadienyl)-2-(2E,6E-phytadienyl)-sn-glycero-3-phosphocholine                              | [M-H] <sup>-</sup>  | C48H92NO6P    | 808.65895                      | 808.65717                    | -2.2             | 4.6E+04     |
| 576 | PC(P-20:0/19:1)                                                                                      | [M-H] <sup>-</sup>  | C47H92NO7P    | 812.65386                      | 812.65627                    | 3.0              | 3.4E+04     |
| 577 | PE(16:0/22:6)(14OH))                                                                                 | [M+Cl] <sup>-</sup> | C43H74NO9P    | 814.47952                      | 814.48006                    | 0.7              | 1.9E+05     |
| 578 | 1-hexadecyl-2-docosanoyl-glycero-3-phospho-(1'-sn-glycerol)                                          | [M+Na] <sup>+</sup> | C44H89O9P     | 815.61364                      | 815.61581                    | 2.7              | 2.7E+05     |
| 579 | 1-tetradecanoyl-2-(4Z,7Z,10Z,13Z,16Z,19Z-docosahexaenoyl)-sn-glycero-3-phosphocholine                | [M+K] <sup>+</sup>  | C44H76NO8P    | 816.49401                      | 816.49391                    | -0.1             | 4.9E+05     |
| 580 | 1-tridecanoyl-2-(5Z,8Z,11Z,14Z-eicosatetraenoyl)-glycero-3-phospho-(1'-myo-inositol)                 | [M+H] <sup>+</sup>  | C42H73O13P    | 817.48616                      | 817.48707                    | 1.1              | 9.3E+05     |
| 581 | 1-tetradecanoyl-2-(4Z,7Z,10Z,13Z,16Z,19Z-docosahexaenoyl)-glycero-3-phosphoserine                    | [M+K] <sup>+</sup>  | C42H70NO10P   | 818.43689                      | 818.43728                    | 0.5              | 2.7E+05     |
| 582 | 1-hexadecanoyl-2-(4Z,7Z,10Z,13Z,16Z-docosapentaenoyl)-sn-glycero-3-phospho-(1'-sn-glycerol)          | [M+Na] <sup>+</sup> | C44H77O10P    | 819.51466                      | 819.51643                    | 2.2              | 5.3E+05     |
| 583 | 1-hexadecyl-2-(9Z,12Z-octadecadienoyl)-glycero-3-phospho-(1'-myo-inositol)                           | [M+H] <sup>+</sup>  | C43H81O12P    | 821.55384                      | 821.55178                    | -2.5             | 4.2E+05     |
| 584 | 5,10-Methenyltetrahydromethanopterin                                                                 | [M+Cl] <sup>-</sup> | C31H44N6O16P  | 822.22454                      | 822.22428                    | -0.3             | 6.7E+04     |
| 585 | 1-(9Z-pentadecenoyl)-2-(13Z,16Z-docosadienoyl)-glycero-3-phosphoserine                               | [M+Na] <sup>+</sup> | C43H78NO10P   | 822.52556                      | 822.52402                    | -1.9             | 4.6E+05     |
| 586 | 1-dodecanoyl-2-(4Z,7Z,10Z,13Z,16Z,19Z-docosahexaenoyl)-glycero-3-phospho-(1'-myo-inositol)           | [M+H] <sup>+</sup>  | C43H71O13P    | 827.47051                      | 827.47160                    | 1.3              | 5.3E+05     |
| 587 | 1-(9Z-pentadecenoyl)-2-(4Z,7Z,10Z,13Z,16Z,19Z-docosahexaenoyl)-glycero-3-phosphocholine              | [M+K] <sup>+</sup>  | C45H76NO8P    | 828.49401                      | 828.49494                    | 1.1              | 4.5E+05     |
| 588 | 1-octadecanoyl-2-(14-hydroxy-4Z,7Z,10Z,12E,16Z,19Z-docosahexaenoyl)-sn-glycero-3-phosphoethanolamine | [M+Na] <sup>+</sup> | C45H78NO9P    | 830.53064                      | 830.52843                    | -2.7             | 3.1E+05     |
| 589 | 3-O-Sulfogalactosylceramide (d18:1/18:0)                                                             | [M+Na] <sup>+</sup> | C42H81NO11S   | 830.54225                      | 830.54395                    | 2.0              | 5.0E+05     |
| 590 | 1-hexadecyl-2-(9Z-heptadecenoyl)-glycero-3-phospho-(1'-myo-inositol)                                 | [M+Na] <sup>+</sup> | C42H81O12P    | 831.53579                      | 831.53580                    | 0.0              | 7.4E+05     |
| 591 | 1-heneicosanoyl-2-(7Z,10Z,13Z,16Z-docosatetraenoyl)-glycero-3-phosphate                              | [M+K] <sup>+</sup>  | C46H83O8P     | 833.54572                      | 833.54694                    | 1.5              | 5.5E+05     |



| #   | Putative Annotation (M) <sup>a</sup>                                                                      | Ion     | Formula        | Theor. <i>m/z</i> <sup>b</sup> | Exp. <i>m/z</i> <sup>c</sup> | ppm <sup>d</sup> | Peak_Height |
|-----|-----------------------------------------------------------------------------------------------------------|---------|----------------|--------------------------------|------------------------------|------------------|-------------|
| 592 | PS(18:3/20:5)                                                                                             | [M+Cl]- | C44H70NO10P    | 838.44314                      | 838.44104                    | -2.5             | 6.4E+04     |
| 593 | 1-pentadecanoyl-2-(9Z-octadecenoyl)-3-hexadecanoyl-glycerol                                               | [M+Na]+ | C52H98O6       | 841.72556                      | 841.72732                    | 2.1              | 2.3E+05     |
| 594 | 1-(11Z-docosenoyl)-2-(7Z,10Z,13Z,16Z-docosatetraenoyl)-glycero-3-phosphate                                | [M+K]+  | C47H83O8P      | 845.54572                      | 845.54718                    | 1.7              | 7.1E+05     |
| 595 | 1-octadecanoyl-2-(15-oxo-5Z,8Z,11Z,13E-eicosatetraenoyl)-sn-glycero-3-phosphoethanolamine                 | [M+Na]+ | C46H82NO9P     | 846.56194                      | 846.56293                    | 1.2              | 5.3E+05     |
| 596 | Acetyl-CoA                                                                                                | [M+K]+  | C23H38N7O17P3S | 848.08893                      | 848.08887                    | -0.1             | 2.7E+05     |
| 597 | 1-tridecanoyl-2-(13Z,16Z-docosadienoyl)-glycero-3-phospho-(1'-myo-inositol)                               | [M+H]+  | C44H81O13P     | 849.54876                      | 849.54874                    | 0.0              | 1.7E+06     |
| 598 | PG(20:1/22:2)                                                                                             | [M-H]-  | C48H89O10P     | 855.61206                      | 855.61081                    | -1.5             | 8.9E+04     |
| 599 | 1-eicosyl-2-(4Z,7Z,10Z,13Z,16Z,19Z-docosahexaenoyl)-glycero-3-phospho-(1'-sn-glycerol)                    | [M+Na]+ | C48H85O9P      | 859.58234                      | 859.58122                    | -1.3             | 4.7E+05     |
| 600 | 1-octadecanoyl-2-(4Z,7Z,10Z,13Z,16Z,19Z-docosahexaenoyl)-sn-glycero-3-phospho-(1'-sn-glycerol)            | [M+K]+  | C46H79O10P     | 861.50424                      | 861.50266                    | -1.8             | 1.6E+06     |
| 601 | 1-(9Z-nonadecenoyl)-2-(7Z,10Z,13Z,16Z-docosatetraenoyl)-glycero-3-phospho-(1'-sn-glycerol)                | [M+Na]+ | C47H83O10P     | 861.56161                      | 861.56198                    | 0.4              | 2.7E+05     |
| 602 | 1-(docosatetraenoyl)-2-(docosahexaenoyl)-sn-glycero-3-phosphoethanolamine                                 | [M+Na]+ | C49H78NO8P     | 862.53573                      | 862.53442                    | -1.5             | 9.9E+05     |
| 603 | SM(d18:1/25:0)                                                                                            | [M+Cl]- | C48H97N2O6P    | 863.67783                      | 863.67659                    | -1.4             | 7.2E+04     |
| 604 | 1-hexadecanoyl-2-heptadecanoyl-3-(5Z,8Z,11Z,14Z,17Z-eicosapentaenoyl)-sn-glycerol                         | [M+H]+  | C56H98O6       | 867.74362                      | 867.74524                    | 1.9              | 3.9E+05     |
| 605 | PI(15:1(9Z)/22:4)                                                                                         | [M-H]-  | C46H79O13P     | 869.51855                      | 869.51902                    | 0.5              | 1.6E+05     |
| 606 | 1-eicosanoyl-2-(4Z,7Z,10Z,13Z,16Z,19Z-docosahexaenoyl)-glycero-3-phospho-(1'-sn-glycerol)                 | [M+Na]+ | C48H83O10P     | 873.56161                      | 873.56115                    | -0.5             | 8.7E+05     |
| 607 | PI(O-18:0/20:3)                                                                                           | [M-H]-  | C47H87O12P     | 873.58624                      | 873.58804                    | 2.1              | 3.0E+04     |
| 608 | TG(16:0/17:2/18:3)                                                                                        | [M+Cl]- | C54H94O6       | 873.67444                      | 873.67405                    | -0.5             | 2.3E+05     |
| 609 | 1-(9Z-hexadecenoyl)-2-(9Z,12Z,15Z-octadecatrienoyl)-3-(5Z,8Z,11Z,14Z,17Z-eicosapentaenoyl)-sn-glycerol    | [M+H]+  | C57H92O6       | 873.69667                      | 873.69851                    | 2.1              | 2.7E+05     |
| 610 | 1-octadecanoyl-2-(7Z,10Z,13Z,16Z-docosatetraenoyl)-glycero-3-phosphoserine                                | [M+K]+  | C46H82NO10P    | 878.53079                      | 878.53336                    | 2.9              | 7.1E+05     |
| 611 | PC(P-20:0/21:0)                                                                                           | [M+Cl]- | C49H98NO7P     | 878.67749                      | 878.67555                    | -2.2             | 1.5E+05     |
| 612 | 1-(11Z-eicosenoyl)-2-(13Z,16Z-docosadienoyl)-glycero-3-phospho-(1'-sn-glycerol)                           | [M+Na]+ | C48H89O10P     | 879.60856                      | 879.60764                    | -1.0             | 8.7E+05     |
| 613 | PS(18:0/22:0)                                                                                             | [M+Cl]- | C46H90NO10P    | 882.59964                      | 882.60112                    | 1.7              | 4.9E+04     |
| 614 | 1-hexadecyl-2-(5Z,8Z,11Z,14Z-eicosatetraenoyl)-glycero-3-phospho-(1'-myo-inositol)                        | [M+K]+  | C45H81O12P     | 883.50972                      | 883.51148                    | 2.0              | 3.0E+05     |
| 615 | 1-hexadecyl-2-(11Z-eicosenoyl)-glycero-3-phospho-(1'-myo-inositol) [1-alkyl,2-acylglycerophosphoinositols | [M+K]+  | C45H87O12P     | 889.55667                      | 889.55678                    | 0.1              | 9.8E+05     |

| #   | Putative Annotation (M) <sup>a</sup>                                                      | Ion                 | Formula        | Theor. <i>m/z</i> <sup>b</sup> | Exp. <i>m/z</i> <sup>c</sup> | ppm <sup>d</sup> | Peak_Height |
|-----|-------------------------------------------------------------------------------------------|---------------------|----------------|--------------------------------|------------------------------|------------------|-------------|
| 616 | 1-heptadecanoyl-2-(5Z,8Z,11Z,14Z-eicosatetraenoyl)-sn-glycero-3-phospho-(1'-myo-inositol) | [M+H] <sup>+</sup>  | C46H84NO13P    | 890.57530                      | 890.57686                    | 1.7              | 7.2E+05     |
| 617 | PG(22:1(11Z)/20:4(5Z,8Z,11Z,14Z))                                                         | [M+K] <sup>+</sup>  | C48H85O10P     | 891.55120                      | 891.54867                    | -2.8             | 2.3E+06     |
| 618 | PC(20:3(8Z,11Z,14Z)/22:4(7Z,10Z,13Z,16Z))                                                 | [M+K] <sup>+</sup>  | C50H86NO8P     | 898.57226                      | 898.57044                    | -2.0             | 5.8E+05     |
| 619 | PS(22:0/22:2)                                                                             | [M-H] <sup>-</sup>  | C50H94NO10P    | 898.65426                      | 898.65568                    | 1.6              | 8.5E+04     |
| 620 | PI(O-18:0/19:1)                                                                           | [M+Cl] <sup>-</sup> | C46H89O12P     | 899.57857                      | 899.58102                    | 2.7              | 8.7E+04     |
| 621 | 2-Methylacetoacetyl-CoA                                                                   | [M+K] <sup>+</sup>  | C26H42N7O18P3S | 904.11515                      | 904.11253                    | -2.9             | 7.4E+05     |
| 622 | (3'-sulfo)Galbeta-Cer(d18:0/2-OH-24:1)                                                    | [M-H] <sup>-</sup>  | C48H91NO12S    | 904.61892                      | 904.61897                    | 0.1              | 3.9E+04     |
| 623 | PC(20:3(8Z,11Z,14Z)/22:1(11Z))                                                            | [M+K] <sup>+</sup>  | C50H92NO8P     | 904.61922                      | 904.62022                    | 1.1              | 2.9E+05     |
| 624 | PG(21:0/22:4(7Z,10Z,13Z,16Z))                                                             | [M+K] <sup>+</sup>  | C49H89O10P     | 907.58250                      | 907.58427                    | 2.0              | 6.5E+05     |
| 625 | PG(21:0/22:0)                                                                             | [M+Cl] <sup>-</sup> | C49H97O10P     | 911.65134                      | 911.65134                    | 0.0              | 2.2E+04     |
| 626 | PI(P-18:0/20:2(11Z,14Z))                                                                  | [M+K] <sup>+</sup>  | C47H87O12P     | 913.55667                      | 913.55665                    | 0.0              | 6.5E+05     |
| 627 | PI(16:0/22:1(11Z))                                                                        | [M+Na] <sup>+</sup> | C47H89O13P     | 915.59330                      | 915.59551                    | 2.4              | 6.8E+05     |
| 628 | PS(22:1(11Z)/22:2(13Z,16Z))                                                               | [M+Na] <sup>+</sup> | C50H92NO10P    | 920.63511                      | 920.63564                    | 0.6              | 5.6E+05     |
| 629 | 2-Aminobenzoyl-CoA                                                                        | [M-H] <sup>-</sup>  | C28H41N8O17P3S | 921.12172                      | 921.12282                    | 1.2              | 1.0E+05     |
| 630 | PI(22:1(11Z)/17:1(9Z))                                                                    | [M+Na] <sup>+</sup> | C48H89O13P     | 927.59330                      | 927.59191                    | -1.5             | 3.2E+05     |
| 631 | Glc-GP(18:0/20:0)                                                                         | [M+K] <sup>+</sup>  | C47H91O13P     | 933.58289                      | 933.58437                    | 1.6              | 1.2E+06     |
| 632 | Bilirubin beta-diglucuronide                                                              | [M-H] <sup>-</sup>  | C45H52N4O18    | 935.32038                      | 935.32314                    | 3.0              | 8.4E+04     |
| 633 | 1,2-Di-(9Z,12Z,15Z-octadecatrienoyl)-3-(Galactosyl-alpha-1-6-Galactosyl-beta-1)-glycerol  | [M+H] <sup>+</sup>  | C51H84O15      | 937.58830                      | 937.58747                    | -0.9             | 3.8E+05     |
| 634 | PI(O-20:0/20:0)                                                                           | [M+K] <sup>+</sup>  | C49H97O12P     | 947.63492                      | 947.63562                    | 0.7              | 1.4E+06     |
| 635 | PI(22:6/21:0)                                                                             | [M-H] <sup>-</sup>  | C52H89O13P     | 951.59680                      | 951.59549                    | -1.4             | 7.8E+04     |
| 636 | 3-O-Sulfogalactosylceramide (d18:1/26:1(17Z))                                             | [M+K] <sup>+</sup>  | C50H95NO11S    | 956.62574                      | 956.62528                    | -0.5             | 7.3E+05     |
| 637 | PI(21:0/22:2(13Z,16Z))                                                                    | [M+H] <sup>+</sup>  | C52H97O13P     | 961.67396                      | 961.67402                    | 0.1              | 9.6E+05     |
| 638 | PI(20:1(11Z)/22:4(7Z,10Z,13Z,16Z))                                                        | [M+Na] <sup>+</sup> | C51H89O13P     | 963.59330                      | 963.59065                    | -2.8             | 2.6E+05     |
| 639 | (3S)-Citryl-CoA                                                                           | [M+Na] <sup>+</sup> | C27H42N7O22P3S | 964.12087                      | 964.12004                    | -0.9             | 2.7E+05     |
| 640 | (2E)-Dodecenoyl-CoA                                                                       | [M+Na] <sup>+</sup> | C33H52N7O17P3S | 966.22454                      | 966.22373                    | -0.8             | 2.8E+05     |
| 641 | Trihexosylceramide (d18:1/12:0)                                                           | [M+H] <sup>+</sup>  | C48H89NO18     | 968.61524                      | 968.61264                    | -2.7             | 5.4E+05     |
| 642 | DAT(16:0/22:0(2Me[S],4Me[S]))                                                             | [M+K] <sup>+</sup>  | C52H98O13      | 969.66390                      | 969.66591                    | 2.1              | 4.5E+05     |
| 643 | Benzylsuccinyl-CoA                                                                        | [M+Cl] <sup>-</sup> | C32H46N7O19P3S | 992.14760                      | 992.14713                    | -0.5             | 7.9E+04     |
| 644 | PIP2(16:0/18:0)                                                                           | [M-H] <sup>-</sup>  | C43H85O19P3    | 997.48251                      | 997.47996                    | -2.6             | 5.8E+04     |

<sup>a</sup>Cer: Ceramide; GalCer: Galactosylceramide; GlcCer: Glucosylceramide; Glc-GP: phosphatidylglucose; LacCer: Lactosylceramide; MG: Monoacylglycerol; DAT: Acyltrehaloses; DG: Diacylglycerol; TG: Triacylglycerol; MGDG: Monoacyldiacylglycerol; PA: Phosphatidic acid; PC: Phosphatidylcholine; PE: Phosphatidylethanolamine; PG: Glycerophospholipids; PI: Phosphatidylinositol; PIP2: phosphatidylinositol bisphosphate; PS: Phosphatidylserine; SM: Sphingomyelin.

<sup>b</sup>Theor. stands for calculated exact mass to charge ratio.

<sup>c</sup>Exp. stands for experimental *m/z* value.

<sup>d</sup>The error expressed in parts per million (ppm).
